# Supplementary material for: Population heterogeneity in associations between hormonal contraception and antidepressant use in Sweden: a prospective cohort study applying intersectional multilevel analysis of individual heterogeneity and discriminatory accuracy (MAIHDA)
Source: PubMed Central journal article supplement (PMC8488727; doi:10.1136/bmjopen-2021-049553), 2021-10-01
Supplement: bmjopen-2021-049553.draft_revisions.pdf [file bmjopen-2021-049553.draft_revisions.pdf]

# BMJ Open

BMJ Open is committed to open peer review. As part of this commitment we make the peer review history of every article we publish publicly available.

When an article is published we post the peer reviewers' comments and the authors' responses online. We also post the versions of the paper that were used during peer review. These are the versions that the peer review comments apply to.

The versions of the paper that follow are the versions that were submitted during the peer review process. They are not the versions of record or the final published versions. They should not be cited or distributed as the published version of this manuscript.

BMJ Open is an open access journal and the full, final, typeset and author-corrected version of record of the manuscript is available on our site with no access controls, subscription charges or pay-per-view fees (<http://bmjopen.bmj.com>).

If you have any questions on BMJ Open's open peer review process please email [info.bmjopen@bmj.com](mailto:info.bmjopen@bmj.com)

# BMJ Open

## Hormonal Contraception and Anti-depressant Use in Sweden: An Intersectional Multilevel Analysis of Individual Heterogeneity and Discriminatory Accuracy (MAIHDA)

|                               |                                                                                                                                                                                                                                                                                                                                                                                                                                                                                                                                                                                                                                                                                                                                                                                              |
|-------------------------------|----------------------------------------------------------------------------------------------------------------------------------------------------------------------------------------------------------------------------------------------------------------------------------------------------------------------------------------------------------------------------------------------------------------------------------------------------------------------------------------------------------------------------------------------------------------------------------------------------------------------------------------------------------------------------------------------------------------------------------------------------------------------------------------------|
| Journal:                      | <i>BMJ Open</i>                                                                                                                                                                                                                                                                                                                                                                                                                                                                                                                                                                                                                                                                                                                                                                              |
| Manuscript ID                 | bmjopen-2021-049553                                                                                                                                                                                                                                                                                                                                                                                                                                                                                                                                                                                                                                                                                                                                                                          |
| Article Type:                 | Original research                                                                                                                                                                                                                                                                                                                                                                                                                                                                                                                                                                                                                                                                                                                                                                            |
| Date Submitted by the Author: | 03-Feb-2021                                                                                                                                                                                                                                                                                                                                                                                                                                                                                                                                                                                                                                                                                                                                                                                  |
| Complete List of Authors:     | Zettermark, Sofia; Lund University, Unit for Social Epidemiology, Department of Clinical Sciences, Malmö<br>Khalaf, Kani; Lund University, Unit for Social Epidemiology, Department of Clinical Sciences, Malmö<br>Perez-Vicente, Raquel; Lund University, Unit for Social Epidemiology, Department of Clinical Sciences, Malmö<br>Leckie, George; University of Bristol, Center for Multilevel Modelling, School of Education; Lund University, Unit for Social Epidemiology, Department of Clinical Sciences<br>Mulinari, Diana; Lund University, Department of Gender Studies, Faculty of Social Sciences<br>Merlo, Juan; Lund University, Unit for Social Epidemiology, Department of Clinical Sciences; Region Skane Health Care, Center for Primary Health Care Research, Region Skåne |
| Keywords:                     | MENTAL HEALTH, Sex steroids & HRT < DIABETES & ENDOCRINOLOGY, SOCIAL MEDICINE, EPIDEMIOLOGY, Depression & mood disorders < PSYCHIATRY                                                                                                                                                                                                                                                                                                                                                                                                                                                                                                                                                                                                                                                        |
|                               |                                                                                                                                                                                                                                                                                                                                                                                                                                                                                                                                                                                                                                                                                                                                                                                              |

SCHOLARONE™  
Manuscripts

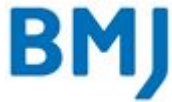

I, the Submitting Author has the right to grant and does grant on behalf of all authors of the Work (as defined in the below author licence), an exclusive licence and/or a non-exclusive licence for contributions from authors who are: i) UK Crown employees; ii) where BMJ has agreed a CC-BY licence shall apply, and/or iii) in accordance with the terms applicable for US Federal Government officers or employees acting as part of their official duties; on a worldwide, perpetual, irrevocable, royalty-free basis to BMJ Publishing Group Ltd ("BMJ") its licensees and where the relevant Journal is co-owned by BMJ to the co-owners of the Journal, to publish the Work in this journal and any other BMJ products and to exploit all rights, as set out in our [licence](#).

The Submitting Author accepts and understands that any supply made under these terms is made by BMJ to the Submitting Author unless you are acting as an employee on behalf of your employer or a postgraduate student of an affiliated institution which is paying any applicable article publishing charge ("APC") for Open Access articles. Where the Submitting Author wishes to make the Work available on an Open Access basis (and intends to pay the relevant APC), the terms of reuse of such Open Access shall be governed by a Creative Commons licence – details of these licences and which [Creative Commons](#) licence will apply to this Work are set out in our licence referred to above.

Other than as permitted in any relevant BMJ Author's Self Archiving Policies, I confirm this Work has not been accepted for publication elsewhere, is not being considered for publication elsewhere and does not duplicate material already published. I confirm all authors consent to publication of this Work and authorise the granting of this licence.

1  
2  
3 **Hormonal Contraception and Anti-depressant Use in Sweden: An**  
4 **Intersectional Multilevel Analysis of Individual Heterogeneity and**  
5 **Discriminatory Accuracy (MAIHDA)**  
6  
7  
8

9 Sofia Zettermark<sup>1\*</sup>, Kani Khalaf<sup>1</sup>, Raquel Perez-Vicente<sup>1</sup>, George Leckie<sup>1,3</sup>, Diana Mulinari<sup>2</sup>,  
10 Juan Merlo<sup>1,4</sup>  
11  
12

13  
14 <sup>1</sup> Unit for Social Epidemiology, Department of Clinical Sciences, Faculty of Medicine, Lund  
15 University, Malmö, Sweden  
16

17 <sup>2</sup> Department of Gender Studies, Faculty of Social Sciences, Lund University, Lund, Sweden  
18

19 <sup>3</sup> Center for Multilevel Modelling, School of Education, University of Bristol, Bristol, United  
20 Kingdom  
21

22 <sup>4</sup> Center for Primary Health Care Research, Region Skåne, Malmö, Sweden  
23  
24  
25  
26  
27

28 \*Corresponding author:  
29

30 Sofia Zettermark  
31

32 sofia.zettermark@med.lu.se  
33

34 Unit for Social Epidemiology, Department of Clinical Sciences  
35

36 Faculty of Medicine, Lund University  
37

38 Jan Waldenströms gata 35, CRC  
39

40 214 28, Malmö, Sweden  
41  
42  
43  
44  
45  
46  
47  
48  
49  
50

51 Word count: 3965  
52

53 Keywords: Epidemiology, Contraception, Hormonal contraception, Mental health, Multilevel  
54 analysis  
55  
56  
57  
58  
59  
60

## ABSTRACT

**Objectives** From a reproductive justice framework, we aimed to investigate how a possible association between hormonal contraceptive (HC) and anti-depressants use (as a proxy for depression) is distributed across intersectional strata in the population. We aimed to visualize how intersecting power dynamics may operate in combination with HC use to predispose for depression. Our main hypothesis was that the previously observed association between HC and anti-depressants use would vary between strata, being more pronounced in more oppressed intersectional contexts. For this purpose, we applied an intersectional Multilevel Analysis of Individual Heterogeneity and Discriminatory Accuracy (MAIHDA) approach.

**Design** Observational prospective cohort study using record linkage of national Swedish registers.

**Setting** The population of Sweden.

**Participants** All 978 761 women aged 12-30 residing in Sweden 2010, without a recent pregnancy and alive during one-year follow-up.

**Primary and secondary outcome measures** Use of any anti-depressant, meaning being dispensed at least one anti-depressant (ATC N06A) during follow-up.

**Results** Previously mentally healthy hormonal contraceptive users had an odds ratio of 1.79 for use anti-depressants compared to non-users, whereas this number was 1.28 for women with previous mental health issues. The highest absolute risks for anti-depressant use were uniformly found in strata with previous mental health issues, with highest risk in women aged 24-30 with no immigrant background, low income, and HC use (51.4%). The largest difference in anti-depressant use between HC users and non-users was found in teenagers, and in adult women of immigrant background with low income. Of the total individual variance in the latent propensity of using antidepressant 9.01% (healthy) and 8.16% (with previous mental health issues) was found at the intersectional stratum level.

**Conclusions** Our study suggests teenagers and women with immigrant background and low income could be more sensitive to mood effects of HC, a heterogeneity important to consider moving forward.

### STRENGTHS AND LIMITATIONS OF THIS STUDY

- Entire Swedish population of women aged 12-30 included
- Pharmacy dispensing automatically linked to individual personal identification number in Sweden through the Swedish Prescribed Drug Register and thus very reliable
- Intersectional MAHIDA is a fruitful way of epidemiologically investigating heterogeneity within a population while considering individual conditions determined by societal power dimensions such as class, gender and race
- Anti-depressant dispensing is not a perfect proxy for depression
- Registers cannot not measure actual use of any medication

## INTRODUCTION

In recent years, attention in the medical community has increasingly been drawn towards depression and other adverse effects on mood related to use of hormonal contraception (HC).(1, 2) Discontinuation rates are high, with mood disturbances or depression being one of the most common complaints.(3-5) Two large epidemiological studies, one in Denmark and the other performed in Sweden, have recently shown a higher risk of anti-depressants and psychotropic drugs use in women on HC, particularly in teenagers.(6, 7) Randomized controlled trials are rare, but suggest a negative influence of HC on well-being and sexual function,(8, 9) as well as evidence of HC modulating brain activity with subsequent mood alterations in some women.(10, 11) Even though oestrogen and progesterone are known to affect mood,(12) the growing body of evidence in this field is contradictory, with recent reviews concluding that both protective and negative effects of HC on mood exist and more research is needed.(13-16) Despite this uncertainty, many scholars agree that certain subgroups of women seem more vulnerable to psychological side effects of HC than others, particularly teenagers and women with previous mental health issues.(10, 13, 17-20) A call for further investigation into these vulnerable subgroups has been made.(14)

A fruitful way of epidemiologically investigating heterogeneity within a population while considering individual conditions determined by societal power dimensions such as class, gender and race has been developed through intersectional theory in recent years.(21-26) Intersectionality theory was first articulated by Black feminist scholars as a way of understanding how an individual inhabits and is formed by more than one social relation such as gender “race” or class, and how these classification systems interconnect to create specific contexts of oppression or privilege.(27, 28) These categorizations should not be seen as individual “risky” identities, but as the social, political and economic contextual conditions that outline our lives through structural inequalities.(29) Reproductive justice is a theoretical framework that builds upon intersectionality and centres diverse groups of unprivileged women’s reproductive experiences to recognize that societal context and differing resources available shape reproductive health.(30) Applying a reproductive justice framework, it becomes clear that we need to take notice of disparate sociocultural contexts and interlocking power dimensions to understand different patterns of usage as well as possible diverse responses to HC.(31, 32)

To operationalize an intersectional mapping of heterogeneity in use of anti-depressants in relation to HC on a population level, we used a multilevel analysis of individual heterogeneity and discriminatory accuracy (MAIHDA).(21-23, 33, 34) We created

1  
2  
3 intersectional strata based on previous literature showing that age, socioeconomic position,  
4 and previous mental illness are relevant intersecting dimensions in understanding the relation  
5 between HC and depression.(17, 20, 35, 36)  
6  
7

8 We conceptualise the intersectional strata as social contexts rather than static  
9 individual traits, thereby visualising how intersecting power dynamics can act in combination  
10 with HC to predispose for depressive mood. Our main hypothesis was that the previously  
11 observed association between HC and use of anti-depressants would vary between strata and  
12 that this association would be more pronounced in more oppressed intersectional contexts.  
13 We investigate this hypothesis on the whole population of women susceptible to HC use in  
14 Sweden.  
15  
16  
17  
18  
19  
20  
21

## 22 **METHOD**

### 23 **Databases and study population**

24 After allowance from the Swedish Ethical Authority and the data safety committees from  
25 Statistics Sweden and the Swedish National Board of Health and Welfare, we obtained a  
26 database created by record linkage of several nationwide registers administered by Statistics  
27 Sweden (the Swedish Population Register and the Longitudinal Integration Database for  
28 Health Insurance and Labour Market Studies, LISA) and the Swedish National Board of  
29 Health and Welfare (National Patient Register, the Swedish Prescribed Drug Register (SPDR)  
30 and the Cause of Death Register). The Swedish authorities linked the registries using a unique  
31 personal identification number, but the database was anonymized before delivering it to us.  
32 We defined an initial cohort containing all 1 064 171 women aged 12 - 30 years residing in  
33 Sweden 1st January 2010 and obtained individual level data on medication use from SPDR,  
34 which contain all dispensed drug prescriptions at Swedish pharmacies since 2006.  
35  
36  
37  
38  
39  
40  
41  
42  
43  
44

45 Every woman was assigned an individual baseline date, defined by the first  
46 dispensed prescription of an HC drug between 1 January 2010 and 31 December 2014 after  
47 12 years of age. If a woman did not fill an HC prescription during this period, she was  
48 assigned a date midmost her own baseline time, i.e. July 2012 for adults, but later for the  
49 youngest girls. From the individual baseline date, the women were followed for one year to  
50 find out if a prescription of an antidepressant was dispensed. Data was also collected on  
51 psychiatric disorders and psychotropic drug use in the past three years (see Assessment of  
52 variables). After excluding women with incomplete follow-up time due to death, emigration,  
53 missing information on country of birth, and pregnancies one year before and after the  
54  
55  
56  
57  
58  
59  
60



1  
2  
3 baseline, the final database consisted of 978 761 women. This database was divided into two  
4 cohorts according to the presence or absence of previous mental health issues, see Figure 1.  
5  
6  
7

### 8 **Assessment of variables**

9  
10 Users of HC were defined as any women who, according the SPDR, filled a prescription of  
11 HC (Anatomical Therapeutical Chemical (ATC) classification system codes G02B, G03AA-  
12 C) between 1 January 2010 and 31 December 2014, while non-users did not have a  
13 prescription filled during the same period. Most prescriptions of HC are acquired via a  
14 midwife in Sweden, although physicians also can prescribe, and the prescriptions can be  
15 dispensed by pharmacies annually or every three months.  
16  
17  
18  
19

20  
21 Anti-depressant use, the outcome of our study, was defined, according to the  
22 SPDR, as being dispensed at least one prescription of antidepressants (ATC: N06A) during  
23 the one-year follow-up.  
24

25  
26 Previous mental health issues were defined as having any psychiatric disorder  
27 (ICD: F00-F99) or psychotropic drug use (ATC: N05A, N05B, N06A) in the past three years.  
28

29  
30 Pregnancies one year previous to baseline and during follow-up were identified  
31 according to the 2019 version of the Nordic Diagnosis-Related Group classification  
32 (NordDRG), Major Diagnostic Categories codes M14 for pregnancy, delivery and post-  
33 partum care.(37)  
34  
35

36  
37 We used family level data on income as of 31 December 2010 from Statistics  
38 Sweden's LISA. Individualized disposable family income was calculated by dividing the total  
39 disposable income of the family by the number of family members, taking into account the  
40 different consumption weights of adults and children determined by Statistics Sweden.  
41 Thereafter, we created three categories (i.e., low, medium, and high) of income using tertile  
42 cut-offs based on the total Swedish population aged 18 - 80 years. We considered the high-  
43 income category as the reference in the comparisons.  
44  
45  
46  
47

48  
49 We defined immigrant status at the family level as no family member >18 years  
50 of age born in Sweden, since understanding of and access to institutions such as health care  
51 differ depending on social position such as it is constructed by the power dimensions of  
52 race/immigration, as well as the experience of xenophobia. This variable should therefore be  
53 considered as an effort to capture a social position affecting possibilities and life trajectories  
54 rather than an essentialist view of otherness.  
55  
56  
57  
58  
59  
60

1  
2  
3 We categorized age at the individual baseline into the following groups: 12 to  
4 17, 18 to 23, and 24 to 30 years to capture age specific conditions of adolescents, young  
5 adults, and adult women.  
6  
7  
8  
9

### 10 **Intersectional Strata**

11 We generated 36 intersectional strata within each cohort stratified by previous mental health  
12 issues, by combining three categories of age, three categories of income, two categories of  
13 immigrant background, and finally two categories of HC use. Mental health issues can be  
14 considered as a valid category of intersectional investigation in a society that consider an able  
15 body and mind vital, in other words relating to the power dimension of able-bodiedness,(38,  
16 39) but was also included in the analysis since it is a strong determinant of antidepressant use  
17 that needs to be addressed. We could consider that over and above individual characteristics,  
18 mental illness-related stigma may condition inequities in health care.(40) As with gender or  
19 income, able-bodiedness concerning mental health can therefore be conceptualized as a  
20 contextual dimension when defining intersectional strata.  
21  
22  
23  
24  
25  
26  
27  
28  
29  
30

### 31 **Statistical analysis**

32 We performed an intersectional MAIHDA with individual women at the first level and the 36  
33 intersectional strata at the second level stratified by previous mental health issues, see  
34 Supplementary material 1-4. The risk of antidepressant use was thus analysed through two  
35 successive multilevel logistic regression models distinguishing between measures of  
36 association and measures of variance and discriminatory accuracy.  
37  
38  
39  
40  
41  
42

#### 43 *Model 1*

44 The first model included only an intercept and a random effect for the intersectional strata  
45 with no covariates. In this model 1 we first (i) performed a simple analysis of components of  
46 variance and calculated the Variance Partition Coefficient (VPC). That is, the share  
47 (expressed as a percentage) of the total individual variance in the latent propensity of  
48 antidepressant use that is at the intersectional strata level. In this simple model, the VPC  
49 correspond with the Intraclass Correlation Coefficient (ICC) which informs on the clustering  
50 of antidepressant use within intersectional strata. The VPC values extend from 0 to 100%.  
51 Second, (ii) we calculate the stratum-specific absolute risks (AR) and their 95% credible  
52 intervals (CI) by transformation of the information from the logistic regression to the  
53 probability scale. We used this information to map the AR heterogeneity across the  
54  
55  
56  
57  
58  
59  
60

1  
2  
3 intersectional strata. Then, (iii) using these stratum-specific predictions, we calculated the  
4 Area Under the receiver operator characteristics Curve (AUC). The AUC informs on the  
5 accuracy of the intersectional strata information for discriminating those women who used  
6 antidepressants from those who did not. The AUC values extend from 0.5 to 1, where 1  
7 represents total accuracy and 0.5 represent absence of accuracy. Both the VPC and the AUC  
8 in model 1 can be interpreted as measures of discriminatory accuracy,(41) and inform on the  
9 magnitude of the general intersectional effects. The higher the VPC and AUC values are, the  
10 higher the influence of the intersectional context on the individual use of antidepressants.  
11 Finally, (iv) we calculated the AR difference (ARD) and 95% CI between similar pairs of  
12 strata differing only on the use of HC. This ARD represents the stratum specific association  
13 between HC and antidepressant use.  
14  
15  
16  
17  
18  
19  
20  
21  
22

### 23 *Model 2 or fixed main effects model*

24 This model includes the fixed, main effects of all the intersectional dimensions (i.e., age,  
25 income, immigrant background and HC use) used to define the intersectional strata. In model  
26 2 we quantified, (i) the association between the intersectional dimensions and the risk of  
27 antidepressant use as expressed by the odds ratio (OR) and 95% CI. We also to calculate (ii)  
28 the Proportional Change in the Variance (PCV). The PCV measures the overall proportion of  
29 strata variance of model 1 explained by the specific intersectional dimensions. Since model 2  
30 contains all the variables used to construct the intersectional strata as main effects, it should  
31 explain all the strata variance (i.e., PCV= 100%). If this is not the case, the remaining  
32 between strata variance would be due to the existence of multiplicative interaction of effects  
33 between the intersectional dimensions defining the strata.(22, 42)  
34  
35  
36  
37  
38  
39  
40  
41  
42

43 The AUCs of the models 1 and 2 are expected to be the same because model 2  
44 only decomposes the stratum-specific predicted probabilities obtained in model 1 into fixed  
45 and random effect components and their sum equals the prediction obtained only by random  
46 effects in model 1.  
47  
48  
49

50 We ran the models using MLwiN 3.00 by calling it from within Stata 14.1 using  
51 the *runmlwin* command.(43) The estimations were performed using Markov chain Monte  
52 Carlo (MCMC) methods. All points estimations and their 95% credible intervals were based  
53 on the parameter and random effect chains obtained from the MCMC estimation. See  
54 elsewhere for further information on the statistical MAIHDA analysis including Stata  
55 commands,(33, 42) and discussion on the theory and methodological approach.(22, 44)  
56  
57  
58  
59  
60

## Patient and Public Involvement statement

The research was developed with a grassroots perspective in mind, whereby women's experiences of use of hormonal contraception inspired and informed the choice of research area and research questions. The anonymised data and scope of the study, including around 1 million women, prohibited direct patient involvement.

## RESULTS

### Characteristics of the population

As show in Figure 1, the study population consisted of 978 761 women aged 12 – 30. Out of those 13.0% (n = 127 323) had previous mental health issues. Mean age was somewhat older for women with previous mental health issues (22.6 years; SD 4.8) than for those without such concerns (20.9 years; SD 5.3). Supplementary table 5 shows pooled statistics for usage of previous mental health issues and HC use. Table 1 displays the baseline characteristics of the population by previous mental health issues and use of hormonal contraceptives.

Table 1. Characteristics of the 978 761 women aged 12 - 30 years and residing in Sweden by 1<sup>st</sup> January 2013 by previous mental health issues and use of hormonal contraceptives. Values are percentages (number of women) if not otherwise indicated.

|                             | Previous mental health issues |                            |                            |                           |
|-----------------------------|-------------------------------|----------------------------|----------------------------|---------------------------|
|                             | No<br>87.0 (n= 851 438)       |                            | Yes<br>13.0 (n= 127 323)   |                           |
|                             | Use of HC                     |                            | Use of HC                  |                           |
|                             | Yes<br>45.4<br>(n= 386 492)   | No<br>54.6<br>(n= 464 946) | Yes<br>48.6<br>(n= 61 914) | No<br>51.4<br>(n= 65 409) |
| Anti-depressant use         | 3.0                           | 1.9                        | 42.8                       | 39.8                      |
| <i>Age</i>                  |                               |                            |                            |                           |
| 12-17 years                 | 16.8                          | 42.1                       | 13.7                       | 19.4                      |
| 18-23 years                 | 48.4                          | 23.3                       | 45.8                       | 31.2                      |
| 24-30 years                 | 34.8                          | 34.6                       | 40.3                       | 49.4                      |
| <i>Income level</i>         |                               |                            |                            |                           |
| Low                         | 32.5                          | 33.1                       | 41.7                       | 45.6                      |
| Middle                      | 25.3                          | 29.5                       | 26.4                       | 27.5                      |
| High                        | 42.4                          | 37.4                       | 31.9                       | 27.0                      |
| <i>Immigrant background</i> |                               |                            |                            |                           |
| No                          | 93.7                          | 82.6                       | 89.1                       | 93.9                      |
| Yes                         | 6.3                           | 17.4                       | 10.9                       | 6.1                       |

Among healthy women, 45.4% (n = 386 942) were users of HC, while this share was 48.6% (n = 61 914) for women with previous mental health issues. Anti-depressants were dispensed to 3.0% of HC users compared to 1.9% of non-users among healthy women during follow-up. For women with previous mental health issues, 42.8% of HC users and 39.8% of non-users were dispensed an anti-depressant. The income levels were generally higher among women without mental health issues, but the differences between HC users and non-users within each cohort were small. Women with immigrant background were less likely use HC (6.3%) if they were previously healthy than if they had pre-existing mental issues (10.9%), while the opposite was true for women without such background.

### Results from the MAIHDA

Table 2 shows the results from the MAIHDA distinguishing between measures of association and measures of variance and discriminatory accuracy.

Table 2. Results from the Multilevel Analysis of Individual Heterogeneity and Discriminatory Accuracy (MAIHDA) distinguishing between measures of association and measures of variance and discriminatory accuracy. The analyses are stratified by the existence of previous mental issues. Values are odds ratios with (95% Confidence Intervals)

|                                | Without metal health issues |                  | With mental health issues |                  |
|--------------------------------|-----------------------------|------------------|---------------------------|------------------|
|                                | Model 1                     | Model 2          | Model 1                   | Model 2          |
| <i>Age</i>                     |                             |                  |                           |                  |
| 12-17                          |                             | 1.00             |                           | 1.00             |
| 18-23                          |                             | 1.71 (1.28-2.19) |                           | 1.52 (1.33-1.73) |
| 24-30                          |                             | 2.02 (1.54-2.68) |                           | 2.62 (2.28-3.07) |
| <i>Income</i>                  |                             |                  |                           |                  |
| High                           |                             | 1.00             |                           | 1.00             |
| Middle                         |                             | 1.12 (0.94-1.40) |                           | 0.88 (0.76-0.99) |
| Low                            |                             | 1.06 (0.84-1.38) |                           | 0.88 (0.79-0.99) |
| <i>Immigrant background</i>    |                             |                  |                           |                  |
| No                             |                             | 1.00             |                           | 1.00             |
| Yes                            |                             | 0.64 (0.50-0.81) |                           | 0.57 (0.51-0.63) |
| <i>Hormonal contraceptives</i> |                             |                  |                           |                  |
| No                             |                             | 1.00             |                           | 1.00             |
| Yes                            |                             | 1.79 (1.41-2.21) |                           | 1.28 (1.16-1.42) |
| <b>Measures of variance</b>    |                             |                  |                           |                  |
| Variance*                      | 0.33 (0.19-0.53)            | 0.11 (0.06-0.18) | 0.29 (0.18-0.48)          | 0.02 (0.01-0.04) |

|     |                  |                  |                   |                   |
|-----|------------------|------------------|-------------------|-------------------|
| VPC | 9.01%            | 3.09%            | 8.16%             | 0.55%             |
| PCV |                  | 67.78%           |                   | 93.84%            |
| AUC | 0.62 (0.62-0.62) | 0.62 (0.62-0.62) | 0.64 (0.64-0.640) | 0.64 (0.64-0.640) |

\*Between-strata variance, variance partition coefficient (VPC), proportional change of the variance (PCV), Area under the curve (AUC)

Model 1 indicates that 9.01% (without mental health issues) and 8.16% (with previous mental health issues) of the total individual variance in the latent propensity of using antidepressant is at the intersectional strata level. These VPCs correspond with AUC values of 0.62 and 0.64 respectively. Both measures suggest the existence of a moderate intersectional effect, largely driven by the main effects of the covariates. The PCV was considerably higher in the group with previous mental health issues, meaning the intersectional dimensions or main effects explain more of the inter-strata variance. Model 2 shows that HC was associated with increased risk of antidepressant use after adjustment for all other intersectional dimensions. This result was seen within both cohorts, but more strongly so in women without previous mental health issues (OR 1.79 compared to 1.28). Finally, the VPC in model 2 was very small (3.09% and 0.55% respectively) but did not vanish. This finding means that while the intersectional strata effect was mainly due the additive effect of variables defining the strata, a small component due to interaction of effects could also be detected.

**Heterogeneity concerning absolute risk of antidepressant use**

Women with previous mental health issues presented much higher risk of antidepressant use than women without such issues, but the risk nonetheless varied across the other intersectional dimensions. Table 3 show the stratum-specific ARs or incidence rates for antidepressant use and 95% CI obtained in model 1.

Table 3. Absolute risk (AR) of antidepressant use, and AR difference (ARD) between user and non-users of hormonal contraceptives but otherwise sharing the same intersectional stratum. The values are calculated from the multilevel analysis of individual heterogeneity and discriminatory accuracy (MAIHDA)

| Mental health issues | Age (years) | Income level | Immigrant background | Number of women | Use of hormonal contraceptive |    |                   |
|----------------------|-------------|--------------|----------------------|-----------------|-------------------------------|----|-------------------|
|                      |             |              |                      |                 | Yes                           | No | Yes-No difference |
|                      |             |              |                      |                 | AR                            | AR | ARD               |

|    |     |         |        |     |         |      |      |      |               |
|----|-----|---------|--------|-----|---------|------|------|------|---------------|
| 1  |     |         |        |     |         |      |      |      |               |
| 2  |     |         |        |     |         |      |      |      |               |
| 3  | No  | 12–17   | Low    | No  | 29 274  | 3.8  | 1.3  | 2.5  | (2.1 – 3.0)   |
| 4  |     |         |        | Yes | 7 776   | 1.2  | 0.5  | 0.7  | (0.1 – 1.4)   |
| 5  |     |         | Middle | No  | 78 405  | 3.2  | 1.0  | 2.1  | (1.9 – 2.4)   |
| 6  |     |         |        | Yes | 10 291  | 2.0  | 0.6  | 1.4  | (0.7 – 2.3)   |
| 7  |     |         | High   | No  | 130 331 | 2.2  | 0.9  | 1.3  | (1.1 – 1.5)   |
| 8  |     |         |        | Yes | 4 745   | 2.9  | 0.8  | 2.0  | (1.0 – 3.3)   |
| 9  |     | 18 – 23 | Low    | No  | 47 678  | 3.7  | 3.0  | 0.7  | (0.4 – 1.1)   |
| 10 |     |         |        | Yes | 11 691  | 2.5  | 1.2  | 1.3  | (0.8 – 1.9)   |
| 11 |     |         | Middle | No  | 76 451  | 3.0  | 2.8  | 0.2  | (0.0 – 0.5)   |
| 12 |     |         |        | Yes | 9 173   | 2.2  | 1.2  | 1.0  | (0.5 – 1.7)   |
| 13 |     |         | High   | No  | 145 735 | 2.4  | 2.3  | 0.1  | (-0.1– 0.3)   |
| 14 |     |         |        | Yes | 4 707   | 2.4  | 1.8  | 0.5  | (-0.2– 1.3)   |
| 15 |     | 24 – 30 | Low    | No  | 141 795 | 3.4  | 3.2  | 0.2  | (0.0 – 0.4)   |
| 16 |     |         |        | Yes | 41 436  | 3.1  | 1.4  | 1.8  | (1.4 – 2.1)   |
| 17 |     |         | Middle | No  | 48 389  | 3.9  | 3.0  | 0.8  | (0.5 – 1.2)   |
| 18 |     |         |        | Yes | 11 649  | 2.9  | 2.4  | 0.5  | (-0.1 – 1.2)  |
| 19 |     |         | High   | No  | 47 985  | 2.7  | 2.6  | 0.1  | (-0.2 – 0.4)  |
| 20 |     |         |        | Yes | 3 927   | 2.1  | 2.3  | 0.2  | (-1.1 – 0.8)  |
| 21 | Yes | 12–17   | Low    | No  | 3 693   | 31.2 | 22.7 | 8.6  | (5.7 – 11.4)  |
| 22 |     |         |        | Yes | 458     | 24.8 | 13.6 | 11.2 | (3.8 – 19.0)  |
| 23 |     |         | Middle | No  | 7 427   | 32.8 | 23.4 | 9.4  | (7.3 – 11.4)  |
| 24 |     |         |        | Yes | 603     | 21.8 | 14.3 | 7.5  | (0.9 – 14.6)  |
| 25 |     |         | High   | No  | 8 612   | 34.5 | 28.1 | 6.4  | (4.4 – 8.4)   |
| 26 |     |         |        | Yes | 406     | 30.8 | 19.8 | 11.0 | (2.8 – 19.7)  |
| 27 |     | 18 – 23 | Low    | No  | 12 165  | 40.3 | 37.8 | 2.5  | (0.8 – 4.3)   |
| 28 |     |         |        | Yes | 1 236   | 30.9 | 19.6 | 11.3 | (6.3 – 16.2)  |
| 29 |     |         | Middle | No  | 14 301  | 38.6 | 36.3 | 2.3  | (0.7 – 3.9)   |
| 30 |     |         |        | Yes | 924     | 27.2 | 19.7 | 7.4  | (2.0 – 12.9)  |
| 31 |     |         | High   | No  | 19 372  | 39.4 | 39.8 | -0.4 | (-1.8 – 1.1)  |
| 32 |     |         |        | Yes | 709     | 29.0 | 25.4 | 3.6  | (-2.8 – 10.1) |
| 33 |     | 24–30   | Low    | No  | 33 409  | 51.7 | 49.9 | 1.8  | (0.7 – 2.9)   |
| 34 |     |         |        | Yes | 4 634   | 40.8 | 32.4 | 8.4  | (5.5 – 11.2)  |
| 35 |     |         | Middle | No  | 9 702   | 51.4 | 50.8 | 0.6  | (-1.4 – 2.6)  |
| 36 |     |         |        | Yes | 1 361   | 38.1 | 37.1 | 1.0  | (-4.6 – 6.6)  |
| 37 |     |         | High   | No  | 7 737   | 49.5 | 48.9 | 0.6  | (-1.7 – 2.7)  |
| 38 |     |         |        | Yes | 574     | 44.9 | 37.5 | 7.4  | (-0.6 – 15.7) |
| 39 |     |         |        |     |         |      |      |      |               |
| 40 |     |         |        |     |         |      |      |      |               |
| 41 |     |         |        |     |         |      |      |      |               |
| 42 |     |         |        |     |         |      |      |      |               |
| 43 |     |         |        |     |         |      |      |      |               |
| 44 |     |         |        |     |         |      |      |      |               |
| 45 |     |         |        |     |         |      |      |      |               |
| 46 |     |         |        |     |         |      |      |      |               |
| 47 |     |         |        |     |         |      |      |      |               |
| 48 |     |         |        |     |         |      |      |      |               |
| 49 |     |         |        |     |         |      |      |      |               |
| 50 |     |         |        |     |         |      |      |      |               |
| 51 |     |         |        |     |         |      |      |      |               |
| 52 |     |         |        |     |         |      |      |      |               |
| 53 |     |         |        |     |         |      |      |      |               |
| 54 |     |         |        |     |         |      |      |      |               |
| 55 |     |         |        |     |         |      |      |      |               |
| 56 |     |         |        |     |         |      |      |      |               |
| 57 |     |         |        |     |         |      |      |      |               |
| 58 |     |         |        |     |         |      |      |      |               |
| 59 |     |         |        |     |         |      |      |      |               |
| 60 |     |         |        |     |         |      |      |      |               |

The highest ARs were observed in non-immigrant women, aged 24-30, with previous mental health issues, using HC and with low (i.e., AR= 51.7%) as well as with middle-income (i.e., AR=51.4%). The lowest ARs were found in teenagers without previous mental health issues and no HC use, especially in the strata of immigrant girls from low (AR= 0.50%) and middle-income (AR= 0.60%) households.

## Heterogeneity concerning the association between hormonal contraceptive and antidepressant use

Overall, the ARD between users and non-users of HC was highest in younger women between 12 and 17 years of age both with and without previous mental health issues, but this association was still considerable across nearly all strata. Table 3 gives detailed information on these associations. In the group of women without previous mental health issues the ARs are of low magnitude but the ARD show an increase risk of antidepressant among adolescent HC users (ARDs ranging from 0.7 to 2.5 percentage points) and adult women with immigrant background and low income (ARD 1.8 in the oldest age group). In the group of women with previous mental health issues the ARs were of much higher magnitude than in women without previous mental health issues. The ARDs were also larger, especially in teenage girls (ARD ranging from 6.4 to 11.2 percentage points) and again among women with immigrant background and low income (ARD 11.3 in ages 18 to 23), indicating a strong association between HC and antidepressant use. However, the 95% credible intervals were broad since the number of individuals was relatively small in those strata. The association between HC and antidepressant use was smaller in adult women native to Sweden no matter their income, and completely disappeared in adult women with high income regardless of immigrant background.

## DISCUSSION

The main hypothesis of our study was that the previously observed association between HC and antidepressant use,(6, 7) would be modified by the intersectional context of the women, being more pronounced in more oppressed intersectional contexts. Our study replicates previous findings as we found the strongest associations between HC and antidepressant use in teenagers (6, 7). We also confirmed our hypothesis that the ARD was heterogenous across intersectional strata pairs as the ARD varied from 0.7 in low-income teenagers with immigrant background and without previous mental health issues to 11.3 in young women with previous mental health issues and immigrant background. As hypothesized, the ARD was more pronounced in more oppressed intersectional contexts like those composed by immigrant, low-income women with previous mental issues. That is, the AR and some extent ARDs varied mainly depending on previous mental health issues, but the HC-antidepressant association considerably modified across pair of strata with discrepant HC use in both cohorts.



1  
2  
3 Independently of previous mental health issues, the propensity for using anti-  
4 depressants was consistently higher for HC users than for non-users in teenagers aged 12-17,  
5 a result aligned with previous studies.(6, 7, 17, 18) As discussed in a previous paper, this  
6 higher risk could be due to a *selective discontinuation bias*.(7) A heterogeneous response to  
7 HC has been confirmed,(13, 20, 45, 46) where the women who experience a negative  
8 influence of HC on psychological health might discontinue treatment in early ages, while  
9 those without symptoms continued on HC into adulthood, creating this age disparity. Aside  
10 from adolescent girls, low and middle income adult women with immigrant background had a  
11 higher ARD, while adolescent girls with immigrant background had both the lowest ARs and  
12 a low grade of modification by HC use.  
13  
14  
15  
16  
17  
18  
19

20  
21 As expected, among adult women the overall propensity for using anti-depressants  
22 was higher, as it is known that anti-depressant use increases by age,(47, 48) and the difference  
23 between HC users and non-users was smaller. Women native to Sweden had a higher absolute  
24 risk of using anti-depressants, but this was moderated by HC exposure to a lower extent than  
25 for immigrant women. In adult women native to Sweden, HC use gave no risk increase of  
26 antidepressant use among those with high income. The lower absolute risk does not  
27 necessarily mean that immigrant women are healthier, since earlier studies have found  
28 immigrants utilize healthcare to a lesser extent, even though the need is pronounced, because  
29 of discrimination.(49, 50)  
30  
31  
32  
33  
34  
35  
36

37 The big difference in anti-depressant consumption depending on HC use for lower  
38 income immigrant women could be interpreted as the intersectional contexts embodied by  
39 these women are more susceptible to the potential detrimental effect of HC on mood. The  
40 interrelating negative consequences of low income as a proxy for class or social position,  
41 gender and xenophobia may accumulate over the life course and lead to a higher vulnerability  
42 to exposures that predispose for antidepressant use later in life,(51-53) whereas this diverse  
43 vulnerability to HC exposure might not be visible in teenagers. Social experiences can vary  
44 depending on for example social position, which in turn impact psychological development,  
45 mood and cognition, thus influencing health.(54, 55) In understanding how HC can impact  
46 women's mental health differently, both possible individual biological predispositions and  
47 social settings need to be investigated, since the emotional response to HC is influenced by  
48 context.(32) In other words, the interlocking power axes that create oppression could  
49 predispose women already under structural burdens for adverse mental health reactions when  
50 using HC. The fact that adult women native to Sweden were almost unaffected by HC use,  
51  
52  
53  
54  
55  
56  
57  
58  
59  
60

1  
2  
3 could strengthen this suggestion. Without the intersectional strata this disparity would not  
4 have been so easily identified and visualized.  
5  
6

7 Focusing on women whose lives are affected by several interlocking power  
8 dimensions such as low social position and xenophobia is fundamental to achieving  
9 reproductive justice.(30) Nonetheless, our intersectional strata should not be considered static  
10 categories of inherently “risky identities” but must be interpreted as context specific  
11 vulnerabilities of women within certain interlocking positions, constituted in relation to power  
12 dynamics created by unequal schemes such as the economic system.(25, 29) It is likely that in  
13 other contexts, other groups could be more vulnerable. In identifying the underlying power  
14 systems creating these intersectional categories and acknowledging their constant movement  
15 and changing dynamics on a societal level, it furthermore becomes possible to address these  
16 inequalities through social change.  
17  
18  
19  
20  
21  
22  
23

24 In this study, we have combined a classical epidemiological approach of  
25 exposure to HC and an intersectional MAHIDA to create a novel understanding of how  
26 intersecting power dynamics could create particular vulnerabilities to this specific exposure.  
27 Because of our study design where women are followed for one year after a dispensed  
28 prescription of HC, it is more theoretically coherent to view use of HC as an exposure rather  
29 than a component of the intersectional strata. However, it is possible to within our approach  
30 view HC use as a socio-contextual factor that captures certain living conditions (for example  
31 more likely to be sexually active or in a heterosexual relationship), which somewhat changes  
32 the interpretation of the results. This epistemological tension is not necessarily a limitation,  
33 but could enrich the dialogue in social epidemiology on whether it is possible to separate  
34 contextual factors from “pure” exposure.(56-58)  
35  
36  
37  
38  
39  
40  
41  
42  
43

#### 44 **Limitations**

45 The findings from this study must be interpreted in the context of its limitations. The SPDR  
46 has highly reliable data on dispensed prescriptions but cannot measure the actual use of  
47 dispensed medications. Use of anti-depressants can be considered a proxy for depression, but  
48 anti-depressants are also prescribed for other reasons than depression, including generalized  
49 anxiety disorder, obsessive-compulsive disorder and panic disorder.(59) Therefore it is not a  
50 perfect proxy of depression but may be a more general indication of impaired mental  
51 health.(60) However, out of all women with potentially unfavorable mental health effects  
52 from HC, only a subset would have symptoms severe enough to get an anti-depressant  
53 prescription, leading instead to many missed cases.  
54  
55  
56  
57  
58  
59  
60

1  
2  
3 As in any observational study, ours only allows for measurements of  
4 associations and cannot determine causation. Furthermore, apparently strong average  
5 associations do not necessarily convey a high discriminatory accuracy (see elsewhere for a  
6 short review and discussion)(61). Nevertheless, since our analysis yielded a moderate  
7 accuracy (i.e., AUC=0.6), the intersectional strata do matter for the propensity to use  
8 antidepressants. A consideration in every quantitative intersectional study is the basis for  
9 creating intersectional categories, since comprehensive information on background and lived  
10 experiences are lacking and the categories are created based on available but crude proxies  
11 such as income level. For example, in our study the group of women with immigrant  
12 background was very heterogenous, so we cannot exclude that the increased AR of  
13 antidepressant use is located on more specific country of birth categories. There is an ongoing  
14 debate whether these crude categorizations are feasible, and extra caution should be taken  
15 when investigating emerging intersectional categories rather than established ones.(62)

## 26 Conclusion

27  
28 It is important to recognise intersectional perspectives and interacting axes of oppression to  
29 tailor better public health interventions, as well as recognising the experiences of oppressed  
30 women to reach reproductive and social justice. (29, 63) Our intersectional MAIHDA  
31 methodology operationalizes this idea by providing information on the discriminatory  
32 accuracy of the contexts that define the intersectional strata. It highlights the need to consider  
33 disadvantages consisting of several interlocking structural dimensions such as income/class,  
34 age and immigration to better understand how HC might predispose certain women, mainly  
35 teenagers and low-income women with immigrant background, for depression. These  
36 vulnerabilities are based in inequalities that are not static, but structurally created and  
37 therefore possible to redeem.

52 **Figure 1.** Selection of the study population.

## 57 Acknowledgements

1  
2  
3 A previous version of this study was presented as a poster at the Gynecological  
4 Endocrinology, the 19th World Congress in December 2020. We thank all colleagues at the  
5 Unit for Social epidemiology, Lund university, for valuable discussions.  
6  
7  
8  
9

### 10 **Ethical statement**

11 The database was approved by the Regional Ethical Review Board in Lund, Sweden, the Data  
12 Safety Board at Statistics Sweden and the National Board of Health and Welfare (Dnr: 2014/  
13 856, 2015/341).  
14  
15  
16  
17

### 18 **Funding statement**

19 This work was supported by The Swedish Research Council (Vetenskapsrådet) grant number:  
20 [2017-01321] <https://www.swecris.se/betasearch/details/project/201701321VR>  
21  
22  
23  
24

### 25 **Competing interests**

26 None declared.  
27  
28  
29

### 30 **Data sharing statement**

31 Public access to the data is restricted by the Swedish Authorities (Public Access to  
32 Information and Secrecy Act; [http://www.government.se/information-](http://www.government.se/information-material/2009/09/public-access-to-information-and-secrecy-act/)  
33 [material/2009/09/public-access-to-information-and-secrecy-act/](http://www.government.se/information-material/2009/09/public-access-to-information-and-secrecy-act/)) but data can be made  
34 available for researchers after a special review that includes approval of the research project  
35 by both an Ethics Committee and the authorities' data safety committees. The National Board  
36 of Health and Welfare is a government agency under the Ministry of Health and Social  
37 Affairs. It is not their policy to provide individual level data to researchers abroad. Instead,  
38 they normally advise researchers in other countries to cooperate with Swedish colleagues, to  
39 whom they can provide data according to standard legal provisions and procedures. Requests  
40 for access to the data can be made to the National Board of Health and Welfare and Statistics  
41 Sweden (<http://www.socialstyrelsen.se/statistics>; [https://www.scb.se/en/services/guidance-](https://www.scb.se/en/services/guidance-for-researchers-and-universities/)  
42 [for-researchers-and-universities/](https://www.scb.se/en/services/guidance-for-researchers-and-universities/)).  
43  
44  
45  
46  
47  
48  
49  
50  
51  
52  
53

### 54 **Contributorship statement**

55 **Sofia Zettermark:** Conceptualization, design, analysis, interpretation of data, writing original  
56 draft, final improvement of version to be published.  
57  
58  
59  
60

1  
2  
3 **Kani Kahlaf:** Interpretation of data, revising draft critically for intellectual content, final  
4 approval of version to be published.

5  
6 **Raquel Perez-Vicente:** Design, analysis, interpretation of data, revising draft critically for  
7 intellectual content, final approval of version to be published.

8  
9  
10 **George Leckie:** Analysis, interpretation of data, revising draft critically for intellectual  
11 content, final approval of version to be published.

12  
13 **Diana Mulinari:** Interpretation of data, revising draft critically for intellectual content, final  
14 approval of version to be published.

15  
16  
17 **Juan Merlo:** Conceptualization, design, analysis, interpretation of data, revising draft  
18 critically for intellectual content, final approval of version to be published.

## 21 22 REFERENCES

- 23  
24 1 Bitzer J. Hormonal contraception and depression: another Pill scandal? *Eur J Contracept*  
25 *Repr* 2017;22(1):1-2.
- 26 2 Frokjaer VG. Pharmacological sex hormone manipulation as a risk model for depression. *J*  
27 *Neurosci Res* 2020;98(7):1283-92.
- 28 3 Rosenberg MJ, Waugh MS. Oral contraceptive discontinuation: a prospective evaluation of  
29 frequency and reasons. *Am J Obstet Gynecol* 1998;179(3;1):577-82.
- 30 4 Simmons RG, Sanders JN, Geist C, et al. Predictors of contraceptive switching and  
31 discontinuation within the first 6 months of use among Highly Effective Reversible  
32 Contraceptive Initiative Salt Lake study participants. *Am J Obstet Gynecol*  
33 2019;220(4):376e1-e12.
- 34 5 Sanders SA, Graham CA, Bass JL, et al. A prospective study of the effects of oral  
35 contraceptives on sexuality and well-being and their relationship to discontinuation.  
36 *Contraception* 2001;64(1):51-8.
- 37 6 Skovlund CW, Morch LS, Kessing LV, et al. Association of Hormonal Contraception With  
38 Depression. *JAMA Psychiat* 2016;73(11):1154-62.
- 39 7 Zettermark S, Perez Vicente R, Merlo J. Hormonal contraception increases the risk of  
40 psychotropic drug use in adolescent girls but not in adults: A pharmacoepidemiological study  
41 on 800 000 Swedish women. *PLoS One* 2018;13(3):e0194773  
42 doi:10.1371/journal.pone.0194773.
- 43 8 Zethraeus N, Dreber A, Ranehill E, et al. A first-choice combined oral contraceptive  
44 influences general well-being in healthy women: a double-blind, randomized, placebo-  
45 controlled trial. *Fertil Steril* 2017;107(5):1238-45.
- 46 9 Lundin C, Malmborg A, Slezak J, et al. Sexual function and combined oral contraceptives -  
47 a randomised, placebo-controlled trial. *Endocr Connect* 2018;7(11):1208-1216  
48 doi:10.1530/EC-18-0384
- 49 10 Gingnell M, Engman J, Frick A, et al. Oral contraceptive use changes brain activity and  
50 mood in women with previous negative affect on the pill--a double-blinded, placebo-  
51 controlled randomized trial of a levonorgestrel-containing combined oral contraceptive.  
52 *Psychoneuroendocrino* 2013;38(7):1133-44.
- 53 11 Fisher PM, Larsen CB, Beliveau V et al. Pharmacologically Induced Sex Hormone  
54 Fluctuation Effects on Resting-State Functional Connectivity in a Risk Model for Depression:  
55 A Randomized Trial. *Neuropsychopharmacol* 2017;42(2):446-53.

- 1  
2  
3 12 Toffoletto S, Lanzenberger R, Gingnell M, et al. Emotional and cognitive functional  
4 imaging of estrogen and progesterone effects in the female human brain: A systematic review.  
5 *Psychoneuroendocrino* 2014;50:28-52.
- 6 13 Schaffir J, Worly BL, Gur TL. Combined hormonal contraception and its effects on mood:  
7 a critical review. *Eur J Contracept Repr* 2016;21(5):347-55.
- 8 14 Robakis T, Williams KE, Nutkiewicz L, et al. Hormonal Contraceptives and Mood:  
9 Review of the Literature and Implications for Future Research. *Curr Psychiat Rep*  
10 2019;21(7):57. doi:10.1007/s11920-019-1034-z
- 11 15 Lewis CA, Kimmig AS, Zsido RG, et al. Effects of Hormonal Contraceptives on Mood: A  
12 Focus on Emotion Recognition and Reactivity, Reward Processing, and Stress Response.  
13 *Curr Psychiat Rep* 2019;21(11):115.
- 14 16 Worly BL, Gur TL, Schaffir J. The relationship between progestin hormonal contraception  
15 and depression: a systematic review. *Contraception* 2018;97(6):478-89.
- 16 17 de Wit AE, Booij SH, Giltay EJ, et al. Association of Use of Oral Contraceptives With  
17 Depressive Symptoms Among Adolescents and Young Women. *JAMA Psychiat*  
18 2020;77(1):52-59 doi:10.1001/jamapsychiatry.2019.2838
- 19 18 Gregory ST, Hall K, Quast T, et al. Hormonal Contraception, depression, and Academic  
20 Performance among females attending college in the United States. *Psychiat Res*  
21 2018;270:111-6.
- 22 19 Lundin C, Danielsson KG, Bixo M, et al. Combined oral contraceptive use is associated  
23 with both improvement and worsening of mood in the different phases of the treatment cycle -  
24 A double-blind, placebo-controlled randomized trial. *Psychoneuroendocrino* 2017;76:135-43.
- 25 20 Bengtsdotter H, Lundin C, Gemzell Danielsson K, Bixo M, Baumgart J, Marions L, et al.  
26 Ongoing or previous mental disorders predispose to adverse mood reporting during combined  
27 oral contraceptive use. *Eur J Contracept Repr* 2018;23(1):45-51.
- 28 21 Wemrell M, Mulinari S, Merlo J. An intersectional approach to multilevel analysis of  
29 individual heterogeneity (MAIH) and discriminatory accuracy. *Soc Sci Med* 2017;178:217-9.
- 30 22 Merlo J. Multilevel analysis of individual heterogeneity and discriminatory accuracy  
31 (MAIHDA) within an intersectional framework. *Soc Sci Med* 2018;203:74-80.
- 32 23 Evans CR, Williams DR, Onnela JP, et al. A multilevel approach to modeling health  
33 inequalities at the intersection of multiple social identities. *Soc Sci Med* 2018;203:64-73.
- 34 24 Bauer GR. Incorporating intersectionality theory into population health research  
35 methodology: Challenges and the potential to advance health equity. *Soc Sci Med*  
36 2014;110:10-7.
- 37 25 McCall L. The complexity of intersectionality. *Signs* 2005;30:1771-800.
- 38 26 Evans CR, Erickson N. Intersectionality and depression in adolescence and early  
39 adulthood: A MAIHDA analysis of the national longitudinal study of adolescent to adult  
40 health, 1995-2008. *Soc Sci Med* 2019;220:1-11.
- 41 27 Crenshaw K. Mapping the Margins: Intersectionality, Identity Politics, and Violence  
42 against Women of Color. *Stanford Law Rev* 1991;43(6):1241-99.
- 43 28 Cho S, Crenshaw K, McCall L. Toward a field of Intersectionality Studies: Theory,  
44 Applications and Praxis. *Signs* 2013;38(4):785-810.
- 45 29 Price K. It's Not Just About Abortion: Incorporating Intersectionality in Research  
46 About Women of Color and Reproduction. *Women Health Iss* 2011;21(3):55-7.
- 47 30 Ross LJ, Rickie S. Reproductive Justice: An Introduction. Oakland, CA: University of  
48 California Press 2017:1-360.
- 49 31 Dehlendorf C, Ruskin R, Grumbach K, et al. Recommendations for intrauterine  
50 contraception: a randomized trial of the effects of patients' race/ethnicity and socioeconomic  
51 status. *Am J Obstet Gynecol* 2010;203(4):319e1-8.
- 52  
53  
54  
55  
56  
57  
58  
59  
60

- 1  
2  
3 32 Montoya ER, Bos PA. How Oral Contraceptives Impact Social-Emotional Behavior and  
4 Brain Function. *Trends Cogn Sci* 2017;21(2):125-36.
- 5 33 Persmark A, Wemrell M, Zettermark S, et al. Precision public health: Mapping  
6 socioeconomic disparities in opioid dispensations at Swedish pharmacies by Multilevel  
7 Analysis of Individual Heterogeneity and Discriminatory Accuracy (MAIHDA). *PLoS One*  
8 2019;14(8):e0220322 doi:10.1371/journal.pone.0220322
- 9 34 Hernandez-Yumar A, Wemrell M, Abasolo Alesson I, et al. Socioeconomic differences in  
10 body mass index in Spain: An intersectional multilevel analysis of individual heterogeneity  
11 and discriminatory accuracy. *PLoS One* 2018;13(12):e0208624.
- 12 35 Lorant V, Deliège D, Eaton W, et al. Socioeconomic inequalities in depression: a meta-  
13 analysis. *Am J Epidemiol* 2003;157(2):98-112.
- 14 36 Dehlendorf C, Rodriguez MI, Levy K, et al. Disparities in family planning. *Am J Obstet*  
15 *Gynecol* 2010;202(3):214-20.
- 16 37 Swedish National Board of Health and Welfare. DRG-koder och text 2019 [DRG codes  
17 and text 2019]. Available from: <https://www.socialstyrelsen.se/utveckla-verksamhet/e-halsa/klassificering-och-koder/drg/drg-koder-och-definitioner/>. [Accessed 2020 Dec 15]
- 18 38 Hankivsky O. Women's health, men's health, and gender and health: Implications of  
19 intersectionality. *Soc Sci Med* 2012;74(11):1712- 20.
- 20 39 Frederick A, Shrifrer D. Race and Disability: From Analogy to Intersectionality. *Sociology*  
21 *of Race and Ethnicity* 2019;5(2):200-14.
- 22 40 Knaak S, Mantler E, Szeto A. Mental illness-related stigma in healthcare: Barriers to  
23 access and care and evidence-based solutions. *Healthcare Management Forum*  
24 2017;30(2):111-6.
- 25 41 Merlo J, Wagner P, Ghith N, et al. An Original Stepwise Multilevel Logistic Regression  
26 Analysis of Discriminatory Accuracy: The Case of Neighbourhoods and Health. *PLoS One*  
27 2016;11(4):e0153778.
- 28 42 Axelsson Fisk S, Mulinari S, Wemrell M, et al. Chronic Obstructive Pulmonary Disease in  
29 Sweden: An intersectional multilevel analysis of individual heterogeneity and discriminatory  
30 accuracy. *SSM Population Health* 2018;4:334-46.
- 31 43 Leckie G, Charlton C. Runmlwin - a program to Run the MLwiN multilevel modelling  
32 software from within stata. *J Stat Softw* 2013;52(11):1-40.
- 33 44 Evans CR, Leckie G, Merlo J. Multilevel versus single-level regression for the analysis of  
34 multilevel information: The case of quantitative intersectional analysis. *Soc Sci Med*  
35 2020;245:112499 doi:10.1016/j.socscimed.2019.112499.
- 36 45 Segeblad B, Borgström A, Odling V, et al. Prevalence of psychiatric disorders and  
37 premenstrual dysphoric symptoms in patients with experience of adverse mood during  
38 treatment with combined oral contraceptives. *Contraception* 2009;79(1):50-5.
- 39 46 Borgström A, Odling V, Ekselius L, et al. Adverse mood effects of combined oral  
40 contraceptives in relation to personality traits. *Eur J Obstet Gyn R B* 2008;141(2):127-30.
- 41 47 Carlsten A, Waern M, Ekedahl A, et al. Antidepressant medication and suicide in Sweden.  
42 *Pharmacoepidem Dr S* 2001;10(6):525-30.
- 43 48 Kalmar S, Szanto K, Rihmer Z, et al. Antidepressant prescription and suicide rates: effect  
44 of age and gender. *Suicide Life Threat* 2008;38(4):363-74.
- 45 49 Mangrio E, Carlson E, Zdravkovic S. Understanding experiences of the Swedish health  
46 care system from the perspective of newly arrived refugees. *BMC Research Notes*  
47 2018;11(1):616.
- 48 50 Kirmayer LJ, Narasiah L, Munoz M, et al. Common mental health problems in immigrants  
49 and refugees: general approach in primary care. *Can Med Assoc J* 2011;183(12):E959-67.
- 50 51 Brenner H. Political economy and health. In: Amick III B, Levine S, Tarlov A, et al, eds.  
51 *Society and health*. New York, NY: Oxford university press 1995:211-46.
- 52  
53  
54  
55  
56  
57  
58  
59  
60

- 1  
2  
3 52 Lynch JW, Kaplan GA, Salonen JT. Why do poor people behave poorly? Variation in  
4 adult health behaviours and psychosocial characteristics by stages of the socioeconomic  
5 lifecourse. *Soc Sci Med* 1997;44(6):809-19.  
6  
7 53 Collins PY, von Unger H, Armbrister A. Church ladies, good girls, and locas: stigma and  
8 the intersection of gender, ethnicity, mental illness, and sexuality in relation to HIV risk. *Soc*  
9 *Sci Med* 2008;67(3):389-97.  
10 54 Honjo K. Social epidemiology: Definition, history, and research examples. *Environ Health*  
11 *Prev* 2004;9(5):193-9.  
12 55 Kubzansky L, Kawachi I. Affective States and Health. In: Berkman L, Kawachi I, eds.  
13 Social epidemiology. New York, NY: Oxford University Press 2000:13-41.  
14 56 Krieger N. Epidemiology and the Peoples Health - Theory and Context. Oxford: Oxford  
15 University Press 2011:1-381.  
16 57 Krieger N. Epidemiology and social sciences: towards a critical reengagement in the 21st  
17 century. *Epidemiol Rev* 2000;22(1):155-63.  
18 58 Link B, Phelan J. Social conditions as fundamental causes of disease. *J Health Soc Behav*  
19 1995(Extra Issue:Forty Years of Medical Sociology):80-94  
20 59 Schatzberg AF. New indications for antidepressants. *J Clin Psychiat* 2000;61(Suppl)11:9-  
21 17.  
22 60 Gardarsdottir H, Heerdink ER, van Dijk L, et al. Indications for antidepressant drug  
23 prescribing in general practice in the Netherlands. *J Affect Disorders* 2007;98(1-2):109-15.  
24 61 Merlo J, Mulinari S, Wemrell M, et al. The tyranny of the averages and the indiscriminate  
25 use of risk factors in public health: The case of coronary heart disease. *SSM Population*  
26 *Health* 2017;3:684-98 doi:10.1016/j.ssmph.2017.08.005  
27 62 Warner LR. A Best Practices Guide to Intersectional Approaches in Psychological  
28 Research. *Sex Roles* 2008;59:454-63.  
29 63 Marmot M. Social justice, epidemiology and health inequalities. *Eur J Epidemiol*  
30 2017;32(7):537-46.  
31  
32  
33  
34  
35  
36  
37  
38  
39  
40  
41  
42  
43  
44  
45  
46  
47  
48  
49  
50  
51  
52  
53  
54  
55  
56  
57  
58  
59  
60



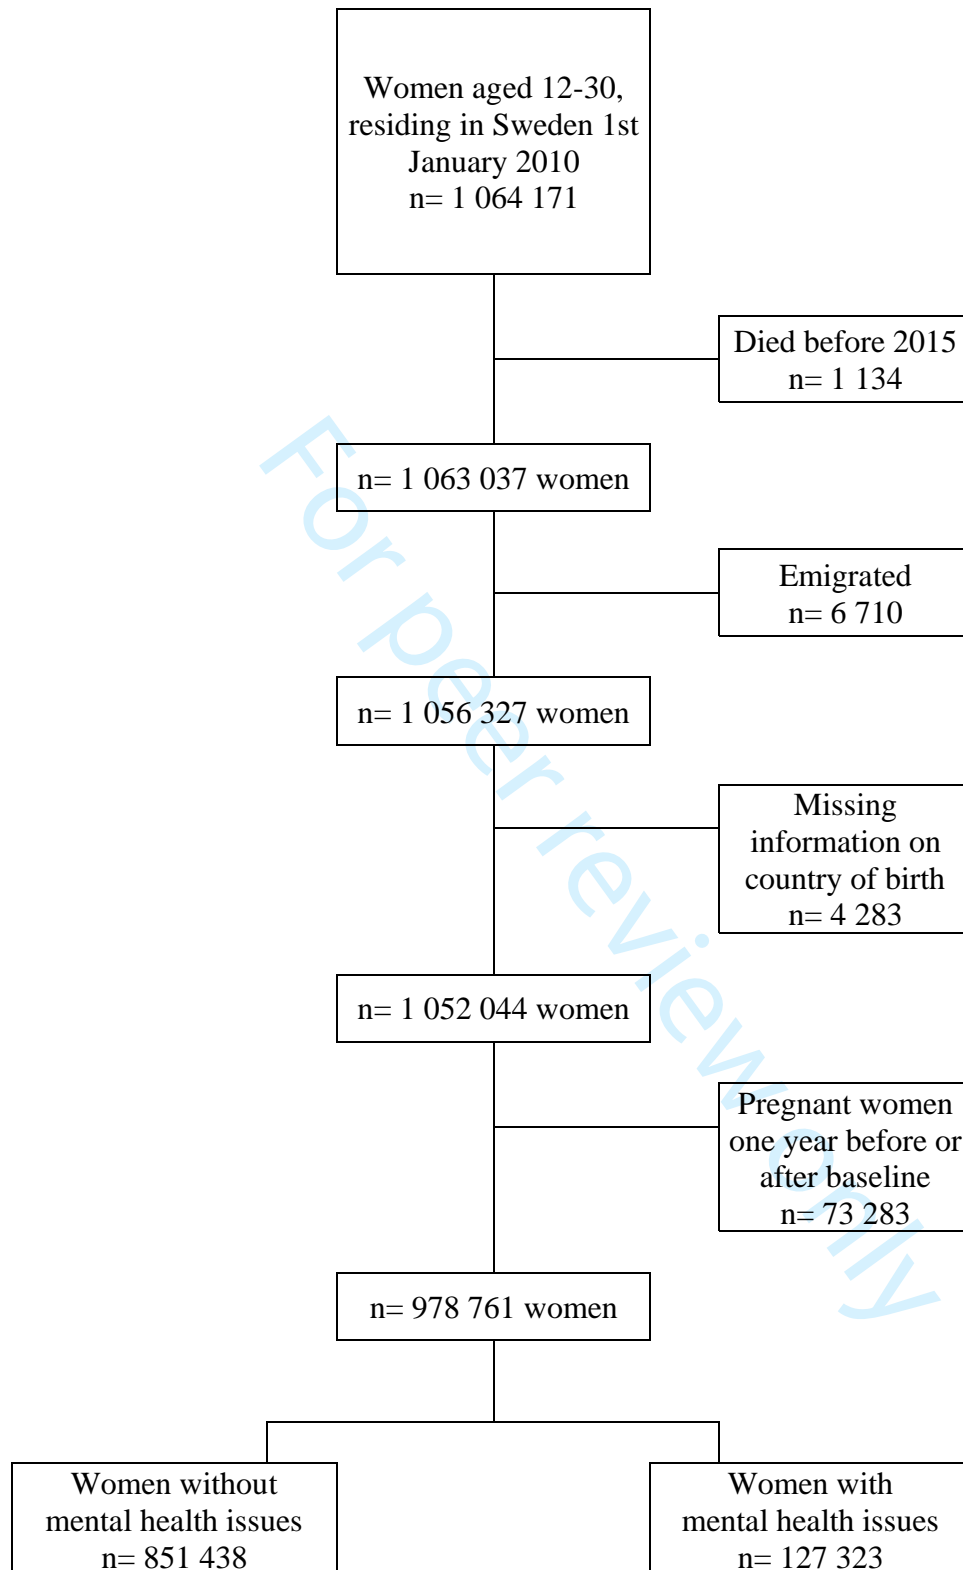

Figure 1. Selection of the study population.

1  
2  
3  
4  
5  
6  
7  
8  
9  
10  
11  
12  
13  
14  
15  
16  
17  
18  
19  
20  
21  
22  
23  
24  
25  
26  
27  
28  
29  
30  
31  
32  
33  
34  
35  
36  
37  
38  
39  
40  
41  
42  
43  
44  
45  
46  
47  
48  
49  
50  
51  
52  
53  
54  
55  
56  
57  
58  
59  
60

For peer review only

```

1
2
3 * Hormonal Contraception and Antidepressant Use in Sweden: An
4 Intersectional Multilevel Analysis of Individual Heterogeneity and
5 Discriminatory Accuracy
6 * (MAIHDA)
7 *****
8 clear *
9 global MLwiN_path "C:\Program Files\MLwiN v3.05\mlwin.exe"
10 set cformat %9.2f
11
12
13 *****
14 * TABLE 1
15 *****
16
17 * Load the data
18 use "final_mlMENTAL.dta", clear
19 keep age_cat1 age_cat2 age_cat3 inc1 inc2 inc3 imm pp proportion denom
20 order age_cat1 age_cat2 age_cat3 inc1 inc2 inc3 imm pp proportion denom
21
22 generate percentage = 100*proportion
23 drop proportion
24 format %9.2f percentage
25
26 generate age_cat = .
27 replace age_cat = 1 if age_cat1==1
28 replace age_cat = 2 if age_cat2==1
29 replace age_cat = 3 if age_cat3==1
30
31 generate inc_cat = .
32 replace inc_cat = 1 if inc1==1
33 replace inc_cat = 2 if inc2==1
34 replace inc_cat = 3 if inc3==1
35
36 * Results for the table
37 tabulate pp [fweight = denom]
38 table pp [fweight = denom], contents(mean percentage )
39 tabulate age_cat pp [fweight = denom], column nofreq
40 tabulate inc_cat pp [fweight = denom], column nofreq
41 tabulate imm pp [fweight = denom], column nofreq
42
43 *****
44 * TABLE 2: MODEL 1
45 *****
46
47 * Load the data
48 use "final_mlMENTAL.dta", clear
49
50 * IGLS estimation, for MCMC initial values
51 runmlwin prop cons, ///
52     level2(inter: cons) ///
53     level1(inter:) ///
54     discrete(distribution(binomial) link(logit) denom(denom) mql1) ///
55     nopause
56
57 * MCMC
58 runmlwin prop cons, ///
59     level2(inter: cons, residuals(u, savechains("mlu.dta",replace))) ///
60     level1(inter:) ///

```

```

1
2
3     discrete(distribution(binomial) link(logit) denom(denom)) ///
4     mcmc(burnin(10000) chain(50000) thin(10) savechains("mlb.dta", replace))
5     ///
6     initsprevious ///
7     nopause
8
9     * Level-2 variance
10    scalar mlsigma2u = [RP2]var(cons)
11    scalar list mlsigma2u
12
13    * Level-1 variance
14    scalar mlsigma2e = _pi^2/3
15    scalar list mlsigma2e
16
17    * VPC
18    display "VPC_u = " %9.4f mlsigma2u/(mlsigma2u + mlsigma2e)
19
20    * Compress and save the data
21    compress
22    save "ml.dta", replace
23
24
25    *-----*
26    * PREPARE FIXED-PART PAREMETER CHAINS
27    *-----*
28
29    use "mlb.dta", clear
30    drop deviance RP2_var_cons_ OD_bcons_1
31    rename FP1_* b_*
32    format %9.2f b_*
33    compress
34    save "mlb_prepped.dta", replace
35    isid iteration
36    codebook iteration, compact
37
38
39    *-----*
40    * PREPARE RANDOM EFFECTS CHAINS
41    *-----*
42
43    use "mlu.dta", clear
44    drop residual idnum
45    rename value u
46    format %9.2f u
47    sort inter iteration
48    order inter iteration
49    compress
50    save "mlu_prepped.dta", replace
51    isid inter iteration
52    codebook iteration, compact
53
54
55    *-----*
56    * MERGE DATA, FIXED-PART PARAMETER AND RANDOM EFFECT CHAINS TOGETHER
57    *-----*
58
59    use "final_mlMENTAL", clear
60    count
61    cross using "mlb_prepped.dta"
62    count

```

```

1
2
3 merge m:1 inter iteration using "mlu_prepped.dta", nogenerate assert(match)
4 count
5 compress
6 save "mldata_prepped.dta", replace
7
8
9
10 -----*
11 * ROC
12 -----*
13 use "mldata_prepped.dta", clear
14 count
15 generate p = invlogit(b_cons + u)
16 gcollapse (mean) p, by(inter num denom)
17 count
18 expand denom
19 sort inter
20 bysort inter: generate y = (_n<=numerator)
21 generate prop = denom/_N
22 generate weight = int(1/prop)
23 roctab y p [fw=weight]
24
25
26 -----*
27 * TABLE 3
28 -----*
29 use "mldata_prepped.dta", clear
30 keep iteration inter age_cat1 age_cat2 age_cat3 incl1 incl2 incl3 imm pp denom
31 b_cons u
32 count
33 generate p = 100*invlogit(b_cons + u)
34 drop b_cons u
35 format %9.1f p
36 drop inter
37 reshape wide denom p, i(iteration age_cat1 age_cat2 age_cat3 incl1 incl2 incl3
38 imm) j(pp)
39 generate denom = denom0 + denom1
40 drop denom0 denom1
41 generate pdiff = p1 - p0
42 gcollapse (mean) p0 p1 pdiff (p2.5) pdifflo=pdiff (p97.5) pdiffhi=pdiff,
43 by(age_cat1 age_cat2 age_cat3 incl1 incl2 incl3 imm denom)
44 format %9.1f pdiff pdifflo pdiffhi
45 order p1 p0 pdiff pdifflo pdiffhi, last
46 gsort -age_cat1 -age_cat2 -age_cat3 -incl1 -incl2 -incl3 imm
47
48
49 *****
50 * TABLE 2: MODEL 2:
51 *****
52
53 * Load the data
54 use "final_mlMENTAL.dta", clear
55
56 * IGLS estimation, for MCMC initial values
57 runmlwin prop cons age_cat2 age_cat3 incl1 incl2 imm pp, ///
58 level2(inter: cons) ///
59 levell1(inter:) ///
60 discrete(distribution(binomial) link(logit) denom(denom) mql1) ///
nopause

```

```

1
2
3
4 * MCMC
5 runmlwin prop cons age_cat2 age_cat3 incl inc2 imm pp, ///
6   level2(inter: cons, residuals(u,savechains("m2u.dta",replace))) ///
7   level1(inter:) ///
8   discrete(distribution(binomial) link(logit) denom(denom)) ///
9   mcmc(burnin(10000) chain(50000) thin(10) savechains("m2b.dta", replace))
10  ///
11  initsprevious ///
12  nopause
13
14 * Odds ratios
15 runmlwin, or
16
17 * Level-2 variance
18 scalar m2sigma2u = [RP2]var(cons)
19 scalar list m2sigma2u
20
21 * Level-1 variance
22 scalar m2sigma2e = _pi^2/3
23 scalar list m2sigma2e
24
25 * VPC
26 display "VPC_u = " %9.4f m2sigma2u/(m2sigma2u + m2sigma2e)
27
28 * Compress and save the data
29 compress
30 save "m2.dta", replace
31
32 * PCV
33 display "PCV = " %9.4f (m2sigma2u - m1sigma2u)/m1sigma2u
34
35 *-----*
36 * PREPARE FIXED-PART PAREMETER CHAINS
37 *-----*
38 use "m2b.dta", clear
39 drop deviance RP2_var_cons_ OD_bcons_1
40 rename FP1_* b_*
41 format %9.2f b_*
42 compress
43 save "m2b_prepped.dta", replace
44 isid iteration
45 codebook iteration, compact
46
47
48 *-----*
49 * PREPARE inter RANDOM EFFECTS CHAINS
50 *-----*
51 use "m2u.dta", clear
52 drop residual idnum
53 rename value u
54 format %9.2f u
55 sort inter iteration
56 order inter iteration
57 compress
58 save "m2u_prepped.dta", replace
59 isid inter iteration
60 codebook iteration, compact

```

```

1
2
3
4
5
6 *-----*
7 * MERGE DATA, FIXED-PART PARAMETER AND RANDOM EFFECT CHAINS TOGETHER
8 *-----*
9 use "final_mlMENTAL", clear
10 count
11 cross using "m2b_prepped.dta"
12 count
13 merge m:1 inter iteration using "m2u_prepped.dta"
14 count
15 save "m2data_prepped.dta", replace
16
17
18 *-----*
19 * ROC
20 *-----*
21 use "m2data_prepped.dta", clear
22 count
23 generate p = invlogit(b_cons + b_age_cat2*age_cat2 + b_age_cat3*age_cat3 +
24 b_incl*incl + b_inc2*inc2 + b_imm*imm + b_pp*pp)
25 gcollapse (mean) p, by(inter num denom)
26 count
27 expand denom
28 sort inter
29 bysort inter: generate y = (_n<=numerator)
30 generate prop = denom/_N
31 generate weight = int(1/prop)
32 roctab y p [fw=weight]
33
34
35 *-----*
36 * TABLE 3
37 *-----*
38 use "m1data_prepped.dta", clear
39 keep iteration inter age_cat1 age_cat2 age_cat3 incl inc2 inc3 imm pp denom
40 b_cons u
41 count
42 generate p = 100*invlogit(b_cons + u)
43 drop b_cons u
44 format %9.1f p
45 drop inter
46 reshape wide denom p, i(iteration age_cat1 age_cat2 age_cat3 incl inc2 inc3
47 imm) j(pp)
48 generate denom = denom0 + denom1
49 drop denom0 denom1
50 generate pdiff = p1 - p0
51 gcollapse (mean) p0 p1 pdiff (p2.5) pdifflo=pdiff (p97.5) pdiffhi=pdiff,
52 by(age_cat1 age_cat2 age_cat3 incl inc2 inc3 imm denom)
53 format %9.1f pdiff pdifflo pdiffhi
54 order p1 p0 pdiff pdifflo pdiffhi, last
55 gsort -age_cat1 -age_cat2 -age_cat3 -incl -inc2 -inc3 imm
56
57
58 *****
59 exit
60

```

```

1
2
3 *****
4 * Hormonal Contraception and Antidepressant Use in Sweden: An
5 Intersectional Multilevel Analysis of Individual Heterogeneity and
6 Discriminatory Accuracy (MAIHDA)
7
8 *****
9 clear *
10 global MLwiN_path "C:\Program Files\MLwiN v3.05\mlwin.exe"
11 set cformat %9.2f
12
13
14 *****
15 * TABLE 1
16 *****
17
18 * Load the data
19 use "final_mlNoMENTAL.dta", clear
20 keep age_cat1 age_cat2 age_cat3 inc1 inc2 inc3 imm pp proportion denom
21 order age_cat1 age_cat2 age_cat3 inc1 inc2 inc3 imm pp proportion denom
22
23 generate percentage = 100*proportion
24 drop proportion
25 format %9.2f percentage
26
27 generate age_cat = .
28 replace age_cat = 1 if age_cat1==1
29 replace age_cat = 2 if age_cat2==1
30 replace age_cat = 3 if age_cat3==1
31
32 generate inc_cat = .
33 replace inc_cat = 1 if inc1==1
34 replace inc_cat = 2 if inc2==1
35 replace inc_cat = 3 if inc3==1
36
37 * Results for the table
38 tabulate pp [fweight = denom]
39 table pp [fweight = denom], contents(mean percentage )
40 tabulate age_cat pp [fweight = denom], column nofreq
41 tabulate inc_cat pp [fweight = denom], column nofreq
42 tabulate imm pp [fweight = denom], column nofreq
43
44
45 *****
46 * TABLE 2: MODEL 1
47 *****
48
49 * Load the data
50 use "final_mlNoMENTAL.dta", clear
51
52 * IGLS estimation, for MCMC initial values
53 runmlwin prop cons, ///
54     level2(inter: cons) ///
55     level1(inter:) ///
56     discrete(distribution(binomial) link(logit) denom(denom) mql1) ///
57     nopause
58
59 * MCMC
60 runmlwin prop cons, ///
61     level2(inter: cons, residuals(u, savechains("mlu.dta",replace))) ///

```



```

1
2
3     level1(inter:) ///
4     discrete(distribution(binomial) link(logit) denom(denom)) ///
5     mcmc(burnin(10000) chain(50000) thin(10) savechains("mlb.dta", replace))
6     ///
7     initsprevious ///
8     nopause
9
10    * Level-2 variance
11    scalar mlsigma2u = [RP2]var(cons)
12    scalar list mlsigma2u
13
14    * Level-1 variance
15    scalar mlsigma2e = _pi^2/3
16    scalar list mlsigma2e
17
18    * VPC
19    display "VPC_u = " %9.4f mlsigma2u/(mlsigma2u + mlsigma2e)
20
21    * Compress and save the data
22    compress
23    save "ml.dta", replace
24
25
26    *-----*
27    * PREPARE FIXED-PART PAREMETER CHAINS
28    *-----*
29
30    use "mlb.dta", clear
31    drop deviance RP2_var_cons_ OD_bcons_1
32    rename FP1_* b_*
33    format %9.2f b_*
34    compress
35    save "mlb_prepped.dta", replace
36    isid iteration
37    codebook iteration, compact
38
39
40    *-----*
41    * PREPARE RANDOM EFFECTS CHAINS
42    *-----*
43
44    use "mlu.dta", clear
45    drop residual idnum
46    rename value u
47    format %9.2f u
48    sort inter iteration
49    order inter iteration
50    compress
51    save "mlu_prepped.dta", replace
52    isid inter iteration
53    codebook iteration, compact
54
55    *-----*
56    * MERGE DATA, FIXED-PART PARAMETER AND RANDOM EFFECT CHAINS TOGETHER
57    *-----*
58
59    use "final_mlnOMENTAL", clear
60    count
61    cross using "mlb_prepped.dta"

```

```

1
2
3 count
4 merge m:1 inter iteration using "mlu_prepped.dta", nogenerate assert(match)
5 count
6 compress
7 save "mldata_prepped.dta", replace
8
9
10
11 *-----*
12 * ROC
13 *-----*
14 use "mldata_prepped.dta", clear
15 count
16 generate p = invlogit(b_cons + u)
17 gcollapse (mean) p, by(inter num denom)
18 count
19 expand denom
20 sort inter
21 bysort inter: generate y = (_n<=numerator)
22 generate prop = denom/_N
23 generate weight = int(1/prop)
24 roctab y p [fw=weight]
25
26
27 *-----*
28 * TABLE 3
29 *-----*
30 use "mldata_prepped.dta", clear
31 keep iteration inter age_cat1 age_cat2 age_cat3 incl1 incl2 incl3 imm pp denom
32 b_cons u
33 count
34 generate p = 100*invlogit(b_cons + u)
35 drop b_cons u
36 format %9.1f p
37 drop inter
38 reshape wide denom p, i(iteration age_cat1 age_cat2 age_cat3 incl1 incl2 incl3
39 imm) j(pp)
40 generate denom = denom0 + denom1
41 drop denom0 denom1
42 generate pdiff = p1 - p0
43 gcollapse (mean) p0 p1 pdiff (p2.5) pdifflo=pdiff (p97.5) pdiffhi=pdiff,
44 by(age_cat1 age_cat2 age_cat3 incl1 incl2 incl3 imm denom)
45 format %9.1f pdiff pdifflo pdiffhi
46 order p1 p0 pdiff pdifflo pdiffhi, last
47 gsort -age_cat1 -age_cat2 -age_cat3 -incl1 -incl2 -incl3 imm
48
49
50 *****
51 * TABLE 2: MODEL 2:
52 *****
53
54 * Load the data
55 use "final_mlnOMENTAL.dta", clear
56
57 * IGLS estimation, for MCMC initial values
58 runmlwin prop cons age_cat2 age_cat3 incl1 incl2 imm pp, ///
59 level2(inter: cons) ///
60 level1(inter:) ///
61 discrete(distribution(binomial) link(logit) denom(denom) mql1) ///

```

```

1
2
3     nopause
4
5 * MCMC
6 runmlwin prop cons age_cat2 age_cat3 incl inc2 imm pp, ///
7     level2(inter: cons, residuals(u,savechains("m2u.dta",replace))) ///
8     levell(inter:) ///
9     discrete(distribution(binomial) link(logit) denom(denom)) ///
10    mcmc(burnin(10000) chain(50000) thin(10) savechains("m2b.dta", replace))
11    ///
12    initsprevious ///
13    nopause
14
15 * Odds ratios
16 runmlwin, or
17
18 * Level-2 variance
19 scalar m2sigma2u = [RP2]var(cons)
20 scalar list m2sigma2u
21
22 * Level-1 variance
23 scalar m2sigma2e = _pi^2/3
24 scalar list m2sigma2e
25
26 * VPC
27 display "VPC_u = " %9.4f m2sigma2u/(m2sigma2u + m2sigma2e)
28
29 * Compress and save the data
30 compress
31 save "m2.dta", replace
32
33 * PCV
34 display "PCV = " %9.4f (m2sigma2u - m1sigma2u)/m1sigma2u
35
36 *-----*
37 * PREPARE FIXED-PART PAREMETER CHAINS
38 *-----*
39 use "m2b.dta", clear
40 drop deviance RP2_var_cons_ OD_bcons_1
41 rename FP1_* b_*
42 format %9.2f b_*
43 compress
44 save "m2b_prepped.dta", replace
45 isid iteration
46 codebook iteration, compact
47
48
49 *-----*
50 * PREPARE inter RANDOM EFFECTS CHAINS
51 *-----*
52 use "m2u.dta", clear
53 drop residual idnum
54 rename value u
55 format %9.2f u
56 sort inter iteration
57 order inter iteration
58 compress
59 save "m2u_prepped.dta", replace
60 isid inter iteration

```

```

1
2
3 codebook iteration, compact
4
5
6
7 *-----*
8 * MERGE DATA, FIXED-PART PARAMETER AND RANDOM EFFECT CHAINS TOGETHER
9 *-----*
10 use "final_m1NoMENTAL", clear
11 count
12 cross using "m2b_prepped.dta"
13 count
14 merge m:1 inter iteration using "m2u_prepped.dta"
15 count
16 save "m2data_prepped.dta", replace
17
18
19 *-----*
20 * ROC
21 *-----*
22 use "m2data_prepped.dta", clear
23 count
24 generate p = invlogit(b_cons + b_age_cat2*age_cat2 + b_age_cat3*age_cat3 +
25 b_incl*incl + b_inc2*inc2 + b_imm*imm + b_pp*pp)
26 gcollapse (mean) p, by(inter num denom)
27 count
28 expand denom
29 sort inter
30 bysort inter: generate y = (_n<=numerator)
31 generate prop = denom/_N
32 generate weight = int(1/prop)
33 roctab y p [fw=weight]
34
35
36 *-----*
37 * TABLE 3
38 *-----*
39 use "m1data_prepped.dta", clear
40 keep iteration inter age_cat1 age_cat2 age_cat3 incl inc2 inc3 imm pp denom
41 b_cons u
42 count
43 generate p = 100*invlogit(b_cons + u)
44 drop b_cons u
45 format %9.1f p
46 drop inter
47 reshape wide denom p, i(iteration age_cat1 age_cat2 age_cat3 incl inc2 inc3
48 imm) j(pp)
49 generate denom = denom0 + denom1
50 drop denom0 denom1
51 generate pdiff = p1 - p0
52 gcollapse (mean) p0 p1 pdiff (p2.5) pdifflo=pdiff (p97.5) pdiffhi=pdiff,
53 by(age_cat1 age_cat2 age_cat3 incl inc2 inc3 imm denom)
54 format %9.1f pdiff pdifflo pdiffhi
55 order p1 p0 pdiff pdifflo pdiffhi, last
56 gsort -age_cat1 -age_cat2 -age_cat3 -incl -inc2 -inc3 imm
57
58
59 *****
60 exit

```

1  
2  
3  
4  
5  
6  
7  
8  
9  
10  
11  
12  
13  
14  
15  
16  
17  
18  
19  
20  
21  
22  
23  
24  
25  
26  
27  
28  
29  
30  
31  
32  
33  
34  
35  
36  
37  
38  
39  
40  
41  
42  
43  
44  
45  
46  
47  
48  
49  
50  
51  
52  
53  
54  
55  
56  
57  
58  
59  
60

For peer review only

1 pp,imm,inter,age\_cat1,age\_cat2,age\_cat3,inc1,inc2,inc3,proportion,numerator,denom,cons  
2 0,0,12-17 Low income 0 0,1,0,0,1,0,0,.22574355,463,2051,1  
3 1,0,12-17 Low income 0 1,1,0,0,1,0,0,.31181487,512,1642,1  
4 0,1,12-17 Low income 1 0,1,0,0,1,0,0,.12383901,40,323,1  
5 1,1,12-17 Low income 1 1,1,0,0,1,0,0,.23703703,32,135,1  
6 0,0,12-17 Middle income 0 0,1,0,0,0,1,0,.23362993,1024,4383,1  
7 1,0,12-17 Middle income 0 1,1,0,0,0,1,0,.32785809,998,3044,1  
8 0,1,12-17 Middle income 1 0,1,0,0,0,1,0,.13422818,60,447,1  
9 1,1,12-17 Middle income 1 1,1,0,0,0,1,0,.20512821,32,156,1  
10 0,0,12-17 High income 0 0,1,0,0,0,0,1,.28093326,1469,5229,1  
11 1,0,12-17 High income 0 1,1,0,0,0,0,1,.34466448,1166,3383,1  
12 0,1,12-17 High income 1 0,1,0,0,0,0,1,.18867925,50,265,1  
13 1,1,12-17 High income 1 1,1,0,0,0,0,1,.30496454,43,141,1  
14 0,0,18-23 Low income 0 0,0,1,0,1,0,0,.37809917,2013,5324,1  
15 1,0,18-23 Low income 0 1,0,1,0,1,0,0,.40359595,2761,6841,1  
16 0,1,18-23 Low income 1 0,0,1,0,1,0,0,.19350649,149,770,1  
17 1,1,18-23 Low income 1 1,0,1,0,1,0,0,.30901289,144,466,1  
18 0,0,18-23 Middle income 0 0,0,1,0,0,1,0,.36302635,2164,5961,1  
19 1,0,18-23 Middle income 0 1,0,1,0,0,1,0,.38645083,3223,8340,1  
20 0,1,18-23 Middle income 1 0,0,1,0,0,1,0,.19285715,108,560,1  
21 1,1,18-23 Middle income 1 1,0,1,0,0,1,0,.26923078,98,364,1  
22 0,0,18-23 High income 0 0,0,1,0,0,0,1,.39782199,2959,7438,1  
23 1,0,18-23 High income 0 1,0,1,0,0,0,1,.39391655,4701,11934,1  
24 0,1,18-23 High income 1 0,0,1,0,0,0,1,.25,82,328,1  
25 1,1,18-23 High income 1 1,0,1,0,0,0,1,.2887139,110,381,1  
26 0,0,24-30 Low income 0 0,0,0,1,1,0,0,.49862742,9082,18214,1  
27 1,0,24-30 Low income 0 1,0,0,1,1,0,0,.51707798,7857,15195,1  
28 0,1,24-30 Low income 1 0,0,0,1,1,0,0,.32457545,1013,3121,1  
29 1,1,24-30 Low income 1 1,0,0,1,1,0,0,.40912095,619,1513,1  
30 0,0,24-30 Middle income 0 0,0,0,1,0,1,0,.50859779,2869,5641,1  
31 1,0,24-30 Middle income 0 1,0,0,1,0,1,0,.51465154,2090,4061,1  
32 0,1,24-30 Middle income 1 0,0,0,1,0,1,0,.37214136,358,962,1  
33 1,1,24-30 Middle income 1 1,0,0,1,0,1,0,.38345864,153,399,1  
34 0,0,24-30 High income 0 0,0,0,1,0,0,1,.48993289,1971,4023,1  
35 1,0,24-30 High income 0 1,0,0,1,0,0,1,.49569198,1841,3714,1  
36 0,1,24-30 High income 1 0,0,0,1,0,0,1,.37669376,139,369,1  
37 1,1,24-30 High income 1 1,0,0,1,0,0,1,.4585366,94,205,1  
38  
39  
40  
41  
42  
43  
44  
45  
46  
47  
48  
49  
50  
51  
52  
53  
54  
55  
56  
57  
58  
59  
60

1  
2 pp,imm,inter,age\_cat1,age\_cat2,age\_cat3,inc1,inc2,inc3,proportion,numerator,denom,cons  
3 0,0,12-17 Low income 0 0,1,0,0,1,0,0,.013224002,279,21098,1  
4 1,0,12-17 Low income 0 1,1,0,0,1,0,0,.038649708,316,8176,1  
5 0,1,12-17 Low income 1 0,1,0,0,1,0,0,.0040497542,28,6914,1  
6 1,1,12-17 Low income 1 1,1,0,0,1,0,0,.0092807421,8,862,1  
7 0,0,12-17 Middle income 0 0,1,0,0,0,1,0,.010099272,587,58123,1  
8 1,0,12-17 Middle income 0 1,1,0,0,0,1,0,.031604379,641,20282,1  
9 0,1,12-17 Middle income 1 0,1,0,0,0,1,0,.0056107035,52,9268,1  
10 1,1,12-17 Middle income 1 1,1,0,0,0,1,0,.019550342,20,1023,1  
11 0,0,12-17 High income 0 0,1,0,0,0,0,1,.008893352,859,96589,1  
12 1,0,12-17 High income 0 1,1,0,0,0,0,1,.021960761,741,33742,1  
13 0,1,12-17 High income 1 0,1,0,0,0,0,1,.0076045627,30,3945,1  
14 1,1,12-17 High income 1 1,1,0,0,0,0,1,.029999999,24,800,1  
15 0,0,18-23 Low income 0 0,0,1,0,1,0,0,.029676914,530,17859,1  
16 1,0,18-23 Low income 0 1,0,1,0,1,0,0,.036956303,1102,29819,1  
17 0,1,18-23 Low income 1 0,0,1,0,1,0,0,.011607248,98,8443,1  
18 1,1,18-23 Low income 1 1,0,1,0,1,0,0,.024938423,81,3248,1  
19 0,0,18-23 Middle income 0 0,0,1,0,0,1,0,.027664155,771,27870,1  
20 1,0,18-23 Middle income 0 1,0,1,0,0,1,0,.029785307,1447,48581,1  
21 0,1,18-23 Middle income 1 0,0,1,0,0,1,0,.011609907,75,6460,1  
22 1,1,18-23 Middle income 1 1,0,1,0,0,1,0,.022484334,61,2713,1  
23 0,0,18-23 High income 0 0,0,1,0,0,0,1,.023347162,1058,45316,1  
24 1,0,18-23 High income 0 1,0,1,0,0,0,1,.024447564,2455,100419,1  
25 0,1,18-23 High income 1 0,0,1,0,0,0,1,.017995911,44,2445,1  
26 1,1,18-23 High income 1 1,0,1,0,0,0,1,.023872679,54,2262,1  
27 0,0,24-30 Low income 0 0,0,0,1,1,0,0,.032189574,2168,67351,1  
28 1,0,24-30 Low income 0 1,0,0,1,1,0,0,.034294236,2553,74444,1  
29 0,1,24-30 Low income 1 0,0,0,1,1,0,0,.013751426,446,32433,1  
30 1,1,24-30 Low income 1 1,0,0,1,1,0,0,.031545039,284,9003,1  
31 0,0,24-30 Middle income 0 0,0,0,1,0,1,0,.030455342,818,26859,1  
32 1,0,24-30 Middle income 0 1,0,0,1,0,1,0,.038922433,838,21530,1  
33 0,1,24-30 Middle income 1 0,0,0,1,0,1,0,.023714487,202,8518,1  
34 1,1,24-30 Middle income 1 1,0,0,1,0,1,0,.029383583,92,3131,1  
35 0,0,24-30 High income 0 0,0,0,1,0,0,1,.025993951,593,22813,1  
36 1,0,24-30 High income 0 1,0,0,1,0,0,1,.027252503,686,25172,1  
37 0,1,24-30 High income 1 0,0,0,1,0,0,1,.023088569,61,2642,1  
38 1,1,24-30 High income 1 1,0,0,1,0,0,1,.021011673,27,1285,1  
39  
40  
41  
42  
43  
44  
45  
46  
47  
48  
49  
50  
51  
52  
53  
54  
55  
56  
57  
58  
59  
60

1  
2  
3  
4 **SUPPLEMENTARY**  
5  
6  
7

|                                 | Hormonal<br>contraceptives<br>(%) | Mental<br>health issues<br>(%) |
|---------------------------------|-----------------------------------|--------------------------------|
| <i>Age</i>                      |                                   |                                |
| 12-17                           | 26.0                              | 7.5                            |
| 18-23                           | 62.6                              | 14.2                           |
| 24-30                           | 45.3                              | 16.3                           |
| <i>Income</i>                   |                                   |                                |
| Low                             | 45.1                              | 16.6                           |
| Middle                          | 42.3                              | 12.8                           |
| High                            | 48.9                              | 10.0                           |
| <i>Immigrant<br/>background</i> |                                   |                                |
| No                              | 48.7                              | 13.5                           |
| Yes                             | 24.2                              | 9.4                            |

31  
32  
33  
34  
35  
36  
37  
38  
39  
40  
41  
42  
43  
44  
45  
46  
47  
48  
49  
50  
51  
52  
53  
54  
55  
56  
57  
58  
59  
60

Supplementary table 1. Summary statistics. Percentage of women within each intersectional dimension using hormonal contraceptives and with previous mental health issues.



# Reporting checklist for cohort study.

Based on the STROBE cohort guidelines.

## Instructions to authors

Complete this checklist by entering the page numbers from your manuscript where readers will find each of the items listed below.

Your article may not currently address all the items on the checklist. Please modify your text to include the missing information. If you are certain that an item does not apply, please write "n/a" and provide a short explanation.

Upload your completed checklist as an extra file when you submit to a journal.

In your methods section, say that you used the STROBE cohort reporting guidelines, and cite them as:

von Elm E, Altman DG, Egger M, Pocock SJ, Gøtzsche PC, Vandenbroucke JP. The Strengthening of Reporting of Observational Studies in Epidemiology (STROBE) Statement: guidelines for reporting observational studies.

|                           | Reporting Item                                                                                                      | Page Number |
|---------------------------|---------------------------------------------------------------------------------------------------------------------|-------------|
| <b>Title and abstract</b> |                                                                                                                     |             |
| Title                     | <a href="#">#1a</a> Indicate the study's design with a commonly used term in the title or the abstract              | 1           |
| Abstract                  | <a href="#">#1b</a> Provide in the abstract an informative and balanced summary of what was done and what was found | 2           |
| <b>Introduction</b>       |                                                                                                                     |             |
| Background / rationale    | <a href="#">#2</a> Explain the scientific background and rationale for the investigation being reported             | 4-5         |
| Objectives                | <a href="#">#3</a> State specific objectives, including any prespecified hypotheses                                 | 5           |
| <b>Methods</b>            |                                                                                                                     |             |
| Study design              | <a href="#">#4</a> Present key elements of study design early in the paper                                          | 5           |

|    |                        |                      |                                                                                                                                                                                                                                                                      |                                                 |
|----|------------------------|----------------------|----------------------------------------------------------------------------------------------------------------------------------------------------------------------------------------------------------------------------------------------------------------------|-------------------------------------------------|
| 1  | Setting                | <a href="#">#5</a>   | Describe the setting, locations, and relevant dates, including periods of recruitment, exposure, follow-up, and data collection                                                                                                                                      | 5-6                                             |
| 2  |                        |                      |                                                                                                                                                                                                                                                                      |                                                 |
| 3  |                        |                      |                                                                                                                                                                                                                                                                      |                                                 |
| 4  |                        |                      |                                                                                                                                                                                                                                                                      |                                                 |
| 5  |                        |                      |                                                                                                                                                                                                                                                                      |                                                 |
| 6  | Eligibility criteria   | <a href="#">#6a</a>  | Give the eligibility criteria, and the sources and methods of selection of participants. Describe methods of follow-up.                                                                                                                                              | 5-6                                             |
| 7  |                        |                      |                                                                                                                                                                                                                                                                      |                                                 |
| 8  |                        |                      |                                                                                                                                                                                                                                                                      |                                                 |
| 9  |                        |                      |                                                                                                                                                                                                                                                                      |                                                 |
| 10 |                        |                      |                                                                                                                                                                                                                                                                      |                                                 |
| 11 | Eligibility criteria   | <a href="#">#6b</a>  | For matched studies, give matching criteria and number of exposed and unexposed                                                                                                                                                                                      | 5-6                                             |
| 12 |                        |                      |                                                                                                                                                                                                                                                                      |                                                 |
| 13 |                        |                      |                                                                                                                                                                                                                                                                      |                                                 |
| 14 |                        |                      |                                                                                                                                                                                                                                                                      |                                                 |
| 15 | Variables              | <a href="#">#7</a>   | Clearly define all outcomes, exposures, predictors, potential confounders, and effect modifiers. Give diagnostic criteria, if applicable                                                                                                                             | 6-7                                             |
| 16 |                        |                      |                                                                                                                                                                                                                                                                      |                                                 |
| 17 |                        |                      |                                                                                                                                                                                                                                                                      |                                                 |
| 18 |                        |                      |                                                                                                                                                                                                                                                                      |                                                 |
| 19 |                        |                      |                                                                                                                                                                                                                                                                      |                                                 |
| 20 |                        |                      |                                                                                                                                                                                                                                                                      |                                                 |
| 21 | Data sources /         | <a href="#">#8</a>   | For each variable of interest give sources of data and details of methods of assessment (measurement). Describe comparability of assessment methods if there is more than one group. Give information separately for for exposed and unexposed groups if applicable. | 6-7                                             |
| 22 | measurement            |                      |                                                                                                                                                                                                                                                                      |                                                 |
| 23 |                        |                      |                                                                                                                                                                                                                                                                      |                                                 |
| 24 |                        |                      |                                                                                                                                                                                                                                                                      |                                                 |
| 25 |                        |                      |                                                                                                                                                                                                                                                                      |                                                 |
| 26 |                        |                      |                                                                                                                                                                                                                                                                      |                                                 |
| 27 |                        |                      |                                                                                                                                                                                                                                                                      |                                                 |
| 28 |                        |                      |                                                                                                                                                                                                                                                                      |                                                 |
| 29 | Bias                   | <a href="#">#9</a>   | Describe any efforts to address potential sources of bias                                                                                                                                                                                                            | 6-7                                             |
| 30 |                        |                      |                                                                                                                                                                                                                                                                      |                                                 |
| 31 | Study size             | <a href="#">#10</a>  | Explain how the study size was arrived at                                                                                                                                                                                                                            | 5-6                                             |
| 32 |                        |                      |                                                                                                                                                                                                                                                                      |                                                 |
| 33 |                        |                      |                                                                                                                                                                                                                                                                      |                                                 |
| 34 | Quantitative variables | <a href="#">#11</a>  | Explain how quantitative variables were handled in the analyses. If applicable, describe which groupings were chosen, and why                                                                                                                                        | 7-8                                             |
| 35 |                        |                      |                                                                                                                                                                                                                                                                      |                                                 |
| 36 |                        |                      |                                                                                                                                                                                                                                                                      |                                                 |
| 37 |                        |                      |                                                                                                                                                                                                                                                                      |                                                 |
| 38 |                        |                      |                                                                                                                                                                                                                                                                      |                                                 |
| 39 | Statistical methods    | <a href="#">#12a</a> | Describe all statistical methods, including those used to control for confounding                                                                                                                                                                                    |                                                 |
| 40 |                        |                      |                                                                                                                                                                                                                                                                      |                                                 |
| 41 |                        |                      |                                                                                                                                                                                                                                                                      |                                                 |
| 42 |                        |                      |                                                                                                                                                                                                                                                                      |                                                 |
| 43 | 6-7                    |                      |                                                                                                                                                                                                                                                                      |                                                 |
| 44 |                        |                      |                                                                                                                                                                                                                                                                      |                                                 |
| 45 | Statistical methods    | <a href="#">#12b</a> | Describe any methods used to examine subgroups and interactions                                                                                                                                                                                                      | 7-8                                             |
| 46 |                        |                      |                                                                                                                                                                                                                                                                      |                                                 |
| 47 |                        |                      |                                                                                                                                                                                                                                                                      |                                                 |
| 48 |                        |                      |                                                                                                                                                                                                                                                                      |                                                 |
| 49 | Statistical methods    | <a href="#">#12c</a> | Explain how missing data were addressed                                                                                                                                                                                                                              | 7-8                                             |
| 50 |                        |                      |                                                                                                                                                                                                                                                                      |                                                 |
| 51 | Statistical methods    | <a href="#">#12d</a> | If applicable, explain how loss to follow-up was addressed                                                                                                                                                                                                           | n/a Follow-up was complete for the final cohort |
| 52 |                        |                      |                                                                                                                                                                                                                                                                      |                                                 |
| 53 |                        |                      |                                                                                                                                                                                                                                                                      |                                                 |
| 54 |                        |                      |                                                                                                                                                                                                                                                                      |                                                 |
| 55 |                        |                      |                                                                                                                                                                                                                                                                      |                                                 |
| 56 |                        |                      |                                                                                                                                                                                                                                                                      |                                                 |
| 57 |                        |                      |                                                                                                                                                                                                                                                                      |                                                 |
| 58 | Statistical methods    | <a href="#">#12e</a> | Describe any sensitivity analyses                                                                                                                                                                                                                                    |                                                 |
| 59 |                        |                      |                                                                                                                                                                                                                                                                      |                                                 |
| 60 |                        |                      |                                                                                                                                                                                                                                                                      |                                                 |

|    |                       |                      |                                                                                                                                                                                                                                                                                                |
|----|-----------------------|----------------------|------------------------------------------------------------------------------------------------------------------------------------------------------------------------------------------------------------------------------------------------------------------------------------------------|
| 1  | 6-7                   |                      |                                                                                                                                                                                                                                                                                                |
| 2  |                       |                      |                                                                                                                                                                                                                                                                                                |
| 3  | <b>Results</b>        |                      |                                                                                                                                                                                                                                                                                                |
| 4  |                       |                      |                                                                                                                                                                                                                                                                                                |
| 5  | Participants          | <a href="#">#13a</a> | Report numbers of individuals at each stage of study—eg 5-6<br>numbers potentially eligible, examined for eligibility,<br>confirmed eligible, included in the study, completing<br>follow-up, and analysed. Give information separately for<br>for exposed and unexposed groups if applicable. |
| 6  |                       |                      |                                                                                                                                                                                                                                                                                                |
| 7  |                       |                      |                                                                                                                                                                                                                                                                                                |
| 8  |                       |                      |                                                                                                                                                                                                                                                                                                |
| 9  |                       |                      |                                                                                                                                                                                                                                                                                                |
| 10 |                       |                      |                                                                                                                                                                                                                                                                                                |
| 11 |                       |                      |                                                                                                                                                                                                                                                                                                |
| 12 |                       |                      |                                                                                                                                                                                                                                                                                                |
| 13 | Participants          | <a href="#">#13b</a> | Give reasons for non-participation at each stage 5-6                                                                                                                                                                                                                                           |
| 14 |                       |                      |                                                                                                                                                                                                                                                                                                |
| 15 | Participants          | <a href="#">#13c</a> | Consider use of a flow diagram                                                                                                                                                                                                                                                                 |
| 16 |                       |                      |                                                                                                                                                                                                                                                                                                |
| 17 | Figure 1              |                      |                                                                                                                                                                                                                                                                                                |
| 18 |                       |                      |                                                                                                                                                                                                                                                                                                |
| 19 |                       |                      |                                                                                                                                                                                                                                                                                                |
| 20 |                       |                      |                                                                                                                                                                                                                                                                                                |
| 21 | Descriptive data      | <a href="#">#14a</a> | Give characteristics of study participants (eg 9, table 1<br>demographic, clinical, social) and information on<br>exposures and potential confounders. Give information<br>separately for exposed and unexposed groups if<br>applicable.                                                       |
| 22 |                       |                      |                                                                                                                                                                                                                                                                                                |
| 23 |                       |                      |                                                                                                                                                                                                                                                                                                |
| 24 |                       |                      |                                                                                                                                                                                                                                                                                                |
| 25 |                       |                      |                                                                                                                                                                                                                                                                                                |
| 26 |                       |                      |                                                                                                                                                                                                                                                                                                |
| 27 |                       |                      |                                                                                                                                                                                                                                                                                                |
| 28 |                       |                      |                                                                                                                                                                                                                                                                                                |
| 29 | Descriptive data      | <a href="#">#14b</a> | Indicate number of participants with missing data for each<br>variable of interest                                                                                                                                                                                                             |
| 30 |                       |                      |                                                                                                                                                                                                                                                                                                |
| 31 |                       |                      |                                                                                                                                                                                                                                                                                                |
| 32 |                       |                      |                                                                                                                                                                                                                                                                                                |
| 33 | n/a All participants  |                      |                                                                                                                                                                                                                                                                                                |
| 34 | included in final     |                      |                                                                                                                                                                                                                                                                                                |
| 35 | analysis had complete |                      |                                                                                                                                                                                                                                                                                                |
| 36 | data                  |                      |                                                                                                                                                                                                                                                                                                |
| 37 |                       |                      |                                                                                                                                                                                                                                                                                                |
| 38 |                       |                      |                                                                                                                                                                                                                                                                                                |
| 39 |                       |                      |                                                                                                                                                                                                                                                                                                |
| 40 | Descriptive data      | <a href="#">#14c</a> | Summarise follow-up time (eg, average and total amount)                                                                                                                                                                                                                                        |
| 41 |                       |                      |                                                                                                                                                                                                                                                                                                |
| 42 | 5-6                   |                      |                                                                                                                                                                                                                                                                                                |
| 43 |                       |                      |                                                                                                                                                                                                                                                                                                |
| 44 | Outcome data          | <a href="#">#15</a>  | Report numbers of outcome events or summary measures<br>over time. Give information separately for exposed and<br>unexposed groups if applicable.                                                                                                                                              |
| 45 |                       |                      |                                                                                                                                                                                                                                                                                                |
| 46 |                       |                      |                                                                                                                                                                                                                                                                                                |
| 47 |                       |                      |                                                                                                                                                                                                                                                                                                |
| 48 |                       |                      |                                                                                                                                                                                                                                                                                                |
| 49 |                       |                      |                                                                                                                                                                                                                                                                                                |
| 50 | 9-10                  |                      |                                                                                                                                                                                                                                                                                                |
| 51 |                       |                      |                                                                                                                                                                                                                                                                                                |
| 52 | Main results          | <a href="#">#16a</a> | Give unadjusted estimates and, if applicable, confounder-<br>adjusted estimates and their precision (eg, 95%<br>confidence interval). Make clear which confounders were<br>adjusted for and why they were included 10-11                                                                       |
| 53 |                       |                      |                                                                                                                                                                                                                                                                                                |
| 54 |                       |                      |                                                                                                                                                                                                                                                                                                |
| 55 |                       |                      |                                                                                                                                                                                                                                                                                                |
| 56 |                       |                      |                                                                                                                                                                                                                                                                                                |
| 57 |                       |                      |                                                                                                                                                                                                                                                                                                |
| 58 |                       |                      |                                                                                                                                                                                                                                                                                                |
| 59 |                       |                      |                                                                                                                                                                                                                                                                                                |
| 60 |                       |                      |                                                                                                                                                                                                                                                                                                |

|    |                          |                      |                                                                                                                                                                  |       |
|----|--------------------------|----------------------|------------------------------------------------------------------------------------------------------------------------------------------------------------------|-------|
| 1  | Main results             | <a href="#">#16b</a> | Report category boundaries when continuous variables were categorized                                                                                            | 11-12 |
| 2  |                          |                      |                                                                                                                                                                  |       |
| 3  |                          |                      |                                                                                                                                                                  |       |
| 4  | Main results             | <a href="#">#16c</a> | If relevant, consider translating estimates of relative risk into absolute risk for a meaningful time period                                                     |       |
| 5  |                          |                      |                                                                                                                                                                  |       |
| 6  |                          |                      |                                                                                                                                                                  |       |
| 7  |                          |                      |                                                                                                                                                                  |       |
| 8  | 10-12                    |                      |                                                                                                                                                                  |       |
| 9  |                          |                      |                                                                                                                                                                  |       |
| 10 |                          |                      |                                                                                                                                                                  |       |
| 11 | Other analyses           | <a href="#">#17</a>  | Report other analyses done—eg analyses of subgroups and interactions, and sensitivity analyses                                                                   | 11-13 |
| 12 |                          |                      |                                                                                                                                                                  |       |
| 13 |                          |                      |                                                                                                                                                                  |       |
| 14 | <b>Discussion</b>        |                      |                                                                                                                                                                  |       |
| 15 |                          |                      |                                                                                                                                                                  |       |
| 16 |                          |                      |                                                                                                                                                                  |       |
| 17 | Key results              | <a href="#">#18</a>  | Summarise key results with reference to study objectives                                                                                                         | 13-14 |
| 18 |                          |                      |                                                                                                                                                                  |       |
| 19 | Limitations              | <a href="#">#19</a>  | Discuss limitations of the study, taking into account sources of potential bias or imprecision. Discuss both direction and magnitude of any potential bias.      | 15-16 |
| 20 |                          |                      |                                                                                                                                                                  |       |
| 21 |                          |                      |                                                                                                                                                                  |       |
| 22 |                          |                      |                                                                                                                                                                  |       |
| 23 |                          |                      |                                                                                                                                                                  |       |
| 24 | Interpretation           | <a href="#">#20</a>  | Give a cautious overall interpretation considering objectives, limitations, multiplicity of analyses, results from similar studies, and other relevant evidence. | 16    |
| 25 |                          |                      |                                                                                                                                                                  |       |
| 26 |                          |                      |                                                                                                                                                                  |       |
| 27 |                          |                      |                                                                                                                                                                  |       |
| 28 |                          |                      |                                                                                                                                                                  |       |
| 29 |                          |                      |                                                                                                                                                                  |       |
| 30 | Generalisability         | <a href="#">#21</a>  | Discuss the generalisability (external validity) of the study results                                                                                            | 16    |
| 31 |                          |                      |                                                                                                                                                                  |       |
| 32 |                          |                      |                                                                                                                                                                  |       |
| 33 |                          |                      |                                                                                                                                                                  |       |
| 34 | <b>Other Information</b> |                      |                                                                                                                                                                  |       |
| 35 |                          |                      |                                                                                                                                                                  |       |
| 36 | Funding                  | <a href="#">#22</a>  | Give the source of funding and the role of the funders for the present study and, if applicable, for the original study on which the present article is based    | 17    |
| 37 |                          |                      |                                                                                                                                                                  |       |
| 38 |                          |                      |                                                                                                                                                                  |       |
| 39 |                          |                      |                                                                                                                                                                  |       |
| 40 |                          |                      |                                                                                                                                                                  |       |

## Notes:

- 12d: n/a Follow-up was complete for the final cohort
- 14b: n/a All participants included in final analysis had complete data The STROBE checklist is distributed under the terms of the Creative Commons Attribution License CC-BY. This checklist was completed on 26. January 2021 using <https://www.goodreports.org/>, a tool made by the [EQUATOR Network](#) in collaboration with [Penelope.ai](#)

# BMJ Open

## Population Heterogeneity in Associations Between Hormonal Contraception and Antidepressant Use in Sweden: A Prospective Cohort Study Applying Intersectional Multilevel Analysis of Individual Heterogeneity and Discriminatory Accuracy (MAIHDA)

|                                 |                                                                                                                                                                                                                                                                                                                                                                                                                                                                                                                                                                                                                                                                                                                                                                                              |
|---------------------------------|----------------------------------------------------------------------------------------------------------------------------------------------------------------------------------------------------------------------------------------------------------------------------------------------------------------------------------------------------------------------------------------------------------------------------------------------------------------------------------------------------------------------------------------------------------------------------------------------------------------------------------------------------------------------------------------------------------------------------------------------------------------------------------------------|
| Journal:                        | <i>BMJ Open</i>                                                                                                                                                                                                                                                                                                                                                                                                                                                                                                                                                                                                                                                                                                                                                                              |
| Manuscript ID                   | bmjopen-2021-049553.R1                                                                                                                                                                                                                                                                                                                                                                                                                                                                                                                                                                                                                                                                                                                                                                       |
| Article Type:                   | Original research                                                                                                                                                                                                                                                                                                                                                                                                                                                                                                                                                                                                                                                                                                                                                                            |
| Date Submitted by the Author:   | 15-Jun-2021                                                                                                                                                                                                                                                                                                                                                                                                                                                                                                                                                                                                                                                                                                                                                                                  |
| Complete List of Authors:       | Zettermark, Sofia; Lund University, Unit for Social Epidemiology, Department of Clinical Sciences, Malmö<br>Khalaf, Kani; Lund University, Unit for Social Epidemiology, Department of Clinical Sciences, Malmö<br>Perez-Vicente, Raquel; Lund University, Unit for Social Epidemiology, Department of Clinical Sciences, Malmö<br>Leckie, George; University of Bristol, Center for Multilevel Modelling, School of Education; Lund University, Unit for Social Epidemiology, Department of Clinical Sciences<br>Mulinari, Diana; Lund University, Department of Gender Studies, Faculty of Social Sciences<br>Merlo, Juan; Lund University, Unit for Social Epidemiology, Department of Clinical Sciences; Region Skåne Health Care, Center for Primary Health Care Research, Region Skåne |
| <b>Primary Subject Heading</b>: | Epidemiology                                                                                                                                                                                                                                                                                                                                                                                                                                                                                                                                                                                                                                                                                                                                                                                 |
| Secondary Subject Heading:      | Public health, Mental health, Reproductive medicine                                                                                                                                                                                                                                                                                                                                                                                                                                                                                                                                                                                                                                                                                                                                          |
| Keywords:                       | MENTAL HEALTH, Sex steroids & HRT < DIABETES & ENDOCRINOLOGY, SOCIAL MEDICINE, EPIDEMIOLOGY, Depression & mood disorders < PSYCHIATRY                                                                                                                                                                                                                                                                                                                                                                                                                                                                                                                                                                                                                                                        |
|                                 |                                                                                                                                                                                                                                                                                                                                                                                                                                                                                                                                                                                                                                                                                                                                                                                              |

SCHOLARONE™  
Manuscripts



I, the Submitting Author has the right to grant and does grant on behalf of all authors of the Work (as defined in the below author licence), an exclusive licence and/or a non-exclusive licence for contributions from authors who are: i) UK Crown employees; ii) where BMJ has agreed a CC-BY licence shall apply, and/or iii) in accordance with the terms applicable for US Federal Government officers or employees acting as part of their official duties; on a worldwide, perpetual, irrevocable, royalty-free basis to BMJ Publishing Group Ltd ("BMJ") its licensees and where the relevant Journal is co-owned by BMJ to the co-owners of the Journal, to publish the Work in this journal and any other BMJ products and to exploit all rights, as set out in our [licence](#).

The Submitting Author accepts and understands that any supply made under these terms is made by BMJ to the Submitting Author unless you are acting as an employee on behalf of your employer or a postgraduate student of an affiliated institution which is paying any applicable article publishing charge ("APC") for Open Access articles. Where the Submitting Author wishes to make the Work available on an Open Access basis (and intends to pay the relevant APC), the terms of reuse of such Open Access shall be governed by a Creative Commons licence – details of these licences and which [Creative Commons](#) licence will apply to this Work are set out in our licence referred to above.

Other than as permitted in any relevant BMJ Author's Self Archiving Policies, I confirm this Work has not been accepted for publication elsewhere, is not being considered for publication elsewhere and does not duplicate material already published. I confirm all authors consent to publication of this Work and authorise the granting of this licence.

1  
2  
3 1 **Population Heterogeneity in Associations Between Hormonal**  
4  
5 2 **Contraception and Antidepressant Use in Sweden: A Prospective Cohort**  
6  
7 3 **Study Applying Intersectional Multilevel Analysis of Individual**  
8  
9 4 **Heterogeneity and Discriminatory Accuracy (MAIHDA)**  
10

11 5 Sofia Zettermark<sup>1\*</sup>, Kani Khalaf<sup>1</sup>, Raquel Perez-Vicente<sup>1</sup>, George Leckie<sup>1,3</sup>, Diana Mulinari<sup>2</sup>,  
12  
13 6 Juan Merlo<sup>1,4</sup>

14  
15 7  
16 8 <sup>1</sup> Unit for Social Epidemiology, Department of Clinical Sciences, Faculty of Medicine, Lund  
17  
18 9 University, Malmö, Sweden

19  
20 10 <sup>2</sup> Department of Gender Studies, Faculty of Social Sciences, Lund University, Lund, Sweden

21  
22 11 <sup>3</sup> Center for Multilevel Modelling, School of Education, University of Bristol, Bristol, United  
23  
24 12 Kingdom

25 13 <sup>4</sup> Center for Primary Health Care Research, Region Skåne, Malmö, Sweden  
26  
27 14

28  
29 15  
30 16 \*Corresponding author:

31  
32 17 Sofia Zettermark

33  
34 18 sofia.zettermark@med.lu.se

35  
36 19 Unit for Social Epidemiology, Department of Clinical Sciences

37  
38 20 Faculty of Medicine, Lund University

39  
40 21 Jan Waldenströms gata 35, CRC

41  
42 22 214 28, Malmö, Sweden  
43  
44 23  
45 24  
46 25  
47 26  
48 27  
49 28  
50 29  
51 30  
52 31  
53 32  
54 33

55  
56  
57  
58  
59  
60  
Word count: 4390

Keywords: Epidemiology, Contraception, Hormonal contraception, Mental health, Multilevel  
analysis

1  
2  
3 34  
4  
5 35  
6  
7 36  
8  
9 37  
10 38  
11  
12 39  
13  
14 40  
15  
16 41  
17  
18 42  
19  
20 43  
21  
22 44  
23  
24 45  
25  
26 46  
27  
28 47  
29  
30 48  
31  
32 49  
33  
34 50  
35  
36 51  
37  
38 52  
39  
40 53  
41  
42 54  
43  
44 55  
45  
46 56  
47  
48 57  
49  
50 58  
51  
52 59  
53  
54 60  
55  
56 61  
57  
58 62  
59  
60 63  
61  
62 64  
63  
64 65  
65  
66 66  
67 67

## ABSTRACT

**Objectives** From a reproductive justice framework, we aimed to investigate how a possible association between hormonal contraceptive (HC) and anti-depressants use (as a proxy for depression) is distributed across intersectional strata in the population. We aimed to visualize how intersecting power dynamics may operate in combination with HC use to increase or decrease subsequent use of anti-depressants. Our main hypothesis was that the previously observed association between HC and anti-depressants use would vary between strata, being more pronounced in more oppressed intersectional contexts. For this purpose, we applied an intersectional Multilevel Analysis of Individual Heterogeneity and Discriminatory Accuracy (MAIHDA) approach.

**Design** Observational prospective cohort study using record linkage of national Swedish registers.

**Setting** The population of Sweden.

**Participants** All 915 954 women aged 12-30 residing in Sweden 2010, without a recent pregnancy and alive during the individual one-year follow-up.

**Primary outcome measure** Use of any anti-depressant, meaning being dispensed at least one anti-depressant (ATC N06A) during follow-up.

**Results** Previously mentally healthy hormonal contraceptive users had an odds ratio of 1.79 for use of anti-depressants compared to non-users, whereas this number was 1.28 for women with previous mental health issues. The highest anti-depressant use were uniformly found in strata with previous mental health issues, with highest usage in women aged 24-30 with no immigrant background, low income, and HC use (51.4%). The largest difference in anti-depressant use between HC users and non-users was found in teenagers, and in adult women of immigrant background with low income. Of the total individual variance in the latent propensity of using antidepressant 9.01% (healthy) and 8.16% (with previous mental health issues) was found at the intersectional stratum level.

**Conclusions** Our study suggests teenagers and women with immigrant background and low income could be more sensitive to mood effects of HC, a heterogeneity important to consider moving forward.



1  
2  
3 68  
4  
5 69  
6  
7 70  
8  
9 71  
10 72  
11  
12 73  
13  
14 74  
15 75  
16  
17 76  
18  
19 77  
20  
21 78  
22  
23 79  
24 80  
25  
26 81  
27  
28 82  
29  
30 83  
31 84  
32  
33  
34  
35  
36  
37  
38  
39  
40  
41  
42  
43  
44  
45  
46  
47  
48  
49  
50  
51  
52  
53  
54  
55  
56  
57  
58  
59  
60

## STRENGTHS AND LIMITATIONS OF THIS STUDY

- Entire Swedish population of women aged 12-30 included
- Pharmacy dispensing automatically linked to individual personal identification number in Sweden through the Swedish Prescribed Drug Register and thus very reliable
- Intersectional MAHIDA is a fruitful way of epidemiologically investigating heterogeneity within a population while considering individual conditions determined by societal power dimensions such as class, gender and race
- Anti-depressant dispensing is not a perfect proxy for depression
- Registers cannot not measure actual use of any medication

## 85 INTRODUCTION

86 In recent years, attention in the medical community has increasingly been drawn towards  
87 depression and other adverse effects on mood related to use of hormonal contraception  
88 (HC).(1, 2) Discontinuation rates are high, with mood disturbances or depression being one of  
89 the most common complaints.(3-5) Two large epidemiological studies, one in Denmark and  
90 the other performed in Sweden, have recently shown a higher risk of anti-depressants and  
91 psychotropic drugs use in adolescent users of HC.(6, 7) Randomized controlled trials are rare,  
92 but suggest a negative influence of HC on well-being and sexual function,(8, 9) as well as  
93 evidence of HC modulating brain activity with subsequent mood alterations in some  
94 women.(10, 11) Even though oestrogen and progesterone are known to affect mood,(12) the  
95 growing body of evidence in this field is contradictory, with recent reviews concluding that  
96 both protective and negative effects of HC on mood exist and more research is needed.(13-16)  
97 Despite this uncertainty, many scholars agree that certain subgroups of women seem more  
98 vulnerable to psychological side effects of HC than others, particularly teenagers and women  
99 with previous mental health issues.(10, 13, 17-20) A call for further investigation into these  
100 vulnerable subgroups has been made.(14)

101 A fruitful way of epidemiologically investigating heterogeneity within a  
102 population while considering individual conditions determined by societal power dimensions  
103 such as class, gender and race has been developed through intersectional theory in recent  
104 years.(21-26) Intersectionality theory was first articulated by Black feminist scholars as a way  
105 of understanding how an individual inhabits and is formed by more than one social relation  
106 such as gender, “race” or class, and how these classification systems interconnect to create  
107 specific contexts of oppression or privilege.(27, 28) These categorizations should not be seen  
108 as individual “risky” identities, but as the social, political and economic contextual conditions  
109 that outline our lives through structural inequalities.(29) Reproductive justice is a theoretical  
110 framework that builds upon intersectionality and centres diverse groups of unprivileged  
111 women’s reproductive experiences to recognize that societal context and differing resources  
112 available shape reproductive health.(30) Applying a reproductive justice framework, it  
113 becomes clear that we need to take notice of disparate sociocultural contexts and interlocking  
114 power dimensions to understand different patterns of usage as well as possible diverse  
115 responses to HC.(31, 32)

116 To operationalize an intersectional mapping of heterogeneity in use of anti-  
117 depressants in relation to HC on a population level, we used a multilevel analysis of  
118 individual heterogeneity and discriminatory accuracy (MAIHDA).(21-23, 33, 34) We created

1  
2  
3 119 intersectional strata based on previous literature showing that age, socioeconomic position,  
4  
5 120 and previous mental illness are relevant intersecting dimensions in understanding the relation  
6  
7 121 between HC and depression.(17, 20, 35, 36)

8 122 We conceptualise the intersectional strata as social contexts rather than static  
9  
10 123 individual traits, thereby visualising how intersecting power dynamics can act in combination  
11  
12 124 with HC to predispose for depressive mood. Our main hypothesis was that the previously  
13  
14 125 observed association between HC and use of anti-depressants would vary between strata and  
15  
16 126 that this association would be more pronounced in more oppressed intersectional contexts.  
17  
18 127 We investigate this hypothesis on the whole population of women susceptible to HC use in  
19  
20 128 Sweden.

21 129

## 22 130 **METHOD**

### 23 131 **Databases and study population**

24 132 After allowance from the Swedish Ethical Authority and the data safety committees from  
25  
26 133 Statistics Sweden and the Swedish National Board of Health and Welfare, we obtained a  
27  
28 134 database created by record linkage of several nationwide registers administered by Statistics  
29  
30 135 Sweden (the Swedish Population Register and the Longitudinal Integration Database for  
31  
32 136 Health Insurance and Labour Market Studies, LISA) and the Swedish National Board of  
33  
34 137 Health and Welfare (National Patient Register, the Swedish Prescribed Drug Register (SPDR)  
35  
36 138 and the Cause of Death Register). The Swedish authorities linked the registries using a unique  
37  
38 139 personal identification number, but the database was anonymized before delivering it to us.  
39  
40 140 We defined an initial cohort containing all 1,064,171 women aged 12 - 30 years residing in  
41  
42 141 Sweden 1st January 2010 and obtained individual level data on medication use from SPDR,  
43  
44 142 which contain all dispensed drug prescriptions at Swedish pharmacies since 2006.

45 143 Every woman was assigned an individual baseline date, defined by the first  
46  
47 144 dispensed prescription of an HC drug between 1 January 2010 and 31 December 2014 after  
48  
49 145 12 years of age, and was then followed for one year after her individual baseline date. A  
50  
51 146 woman obtaining her first prescription 1 of September 2013 was therefore followed to the 1  
52  
53 147 of September 2014. For non-users of HC the baseline date could not be based on a HC-  
54  
55 148 prescription and was therefore assigned, to 1st of July 2012 for all adults, but later for some of  
56  
57 149 the younger girls turning 12 during our period of investigation. This means all non-users had  
58  
59 150 been true non-users for at least 1.5 years before their follow-up started (1 January 2010 to 1  
60  
151 July 2012) but also continued to be non-users all the way to 31 December 2014. From the  
152  
152 152 individual baseline date, the women were followed for one year to find out if a prescription of

1  
2  
3 153 an antidepressant was dispensed. Data was also collected on psychiatric disorders and  
4  
5 154 psychotropic drug use in the past three years (see Assessment of variables). After excluding  
6  
7 155 women with incomplete follow-up time due to death, emigration, missing information on  
8  
9 156 country of birth, and pregnancies one year before and after the baseline as well as, the final  
10  
11 157 database consisted of 915 952 women. This database was divided into two cohorts according  
12  
13 158 to the presence or absence of previous mental health issues, see Figure 1.  
14

159

### 160 **Assessment of variables**

161 Users of HC were defined as any women who, according the SPDR, filled a prescription of  
162  
163 HC (Anatomical Therapeutical Chemical (ATC) classification system codes G02B, G03AA-  
164  
165 C) between 1 January 2010 and 31 December 2014, while non-users did not have a  
166  
167 prescription filled during the same period. Emergency contraception (G03AD) that are mainly  
168  
169 bought over the counter in Sweden was excluded. The majority of HC prescriptions are  
170  
171 acquired via midwives in Sweden (86.0% in our original cohort), whom can only prescribe  
172  
173 HC for contraceptive purposes. Physicians, most often gynecologists, can also can prescribe  
174  
175 HC for other purposes such as in response to bleeding disturbances or endometriosis. Since  
176  
177 these indications could confound our results, we excluded women with physician-issued  
178  
179 prescriptions, see Figure 1. HC prescriptions can be dispensed by pharmacies annually or  
180  
181 every three months.

182  
183  
184  
185  
186  
187  
188  
189  
190  
191  
192  
193  
194  
195  
196  
197  
198  
199  
200  
201  
202  
203  
204  
205  
206  
207  
208  
209  
210  
211  
212  
213  
214  
215  
216  
217  
218  
219  
220  
221  
222  
223  
224  
225  
226  
227  
228  
229  
230  
231  
232  
233  
234  
235  
236  
237  
238  
239  
240  
241  
242  
243  
244  
245  
246  
247  
248  
249  
250  
251  
252  
253  
254  
255  
256  
257  
258  
259  
260  
261  
262  
263  
264  
265  
266  
267  
268  
269  
270  
271  
272  
273  
274  
275  
276  
277  
278  
279  
280  
281  
282  
283  
284  
285  
286  
287  
288  
289  
290  
291  
292  
293  
294  
295  
296  
297  
298  
299  
300  
301  
302  
303  
304  
305  
306  
307  
308  
309  
310  
311  
312  
313  
314  
315  
316  
317  
318  
319  
320  
321  
322  
323  
324  
325  
326  
327  
328  
329  
330  
331  
332  
333  
334  
335  
336  
337  
338  
339  
340  
341  
342  
343  
344  
345  
346  
347  
348  
349  
350  
351  
352  
353  
354  
355  
356  
357  
358  
359  
360  
361  
362  
363  
364  
365  
366  
367  
368  
369  
370  
371  
372  
373  
374  
375  
376  
377  
378  
379  
380  
381  
382  
383  
384  
385  
386  
387  
388  
389  
390  
391  
392  
393  
394  
395  
396  
397  
398  
399  
400  
401  
402  
403  
404  
405  
406  
407  
408  
409  
410  
411  
412  
413  
414  
415  
416  
417  
418  
419  
420  
421  
422  
423  
424  
425  
426  
427  
428  
429  
430  
431  
432  
433  
434  
435  
436  
437  
438  
439  
440  
441  
442  
443  
444  
445  
446  
447  
448  
449  
450  
451  
452  
453  
454  
455  
456  
457  
458  
459  
460  
461  
462  
463  
464  
465  
466  
467  
468  
469  
470  
471  
472  
473  
474  
475  
476  
477  
478  
479  
480  
481  
482  
483  
484  
485  
486  
487  
488  
489  
490  
491  
492  
493  
494  
495  
496  
497  
498  
499  
500  
501  
502  
503  
504  
505  
506  
507  
508  
509  
510  
511  
512  
513  
514  
515  
516  
517  
518  
519  
520  
521  
522  
523  
524  
525  
526  
527  
528  
529  
530  
531  
532  
533  
534  
535  
536  
537  
538  
539  
540  
541  
542  
543  
544  
545  
546  
547  
548  
549  
550  
551  
552  
553  
554  
555  
556  
557  
558  
559  
560  
561  
562  
563  
564  
565  
566  
567  
568  
569  
570  
571  
572  
573  
574  
575  
576  
577  
578  
579  
580  
581  
582  
583  
584  
585  
586  
587  
588  
589  
590  
591  
592  
593  
594  
595  
596  
597  
598  
599  
600  
601  
602  
603  
604  
605  
606  
607  
608  
609  
610  
611  
612  
613  
614  
615  
616  
617  
618  
619  
620  
621  
622  
623  
624  
625  
626  
627  
628  
629  
630  
631  
632  
633  
634  
635  
636  
637  
638  
639  
640  
641  
642  
643  
644  
645  
646  
647  
648  
649  
650  
651  
652  
653  
654  
655  
656  
657  
658  
659  
660  
661  
662  
663  
664  
665  
666  
667  
668  
669  
670  
671  
672  
673  
674  
675  
676  
677  
678  
679  
680  
681  
682  
683  
684  
685  
686  
687  
688  
689  
690  
691  
692  
693  
694  
695  
696  
697  
698  
699  
700  
701  
702  
703  
704  
705  
706  
707  
708  
709  
710  
711  
712  
713  
714  
715  
716  
717  
718  
719  
720  
721  
722  
723  
724  
725  
726  
727  
728  
729  
730  
731  
732  
733  
734  
735  
736  
737  
738  
739  
740  
741  
742  
743  
744  
745  
746  
747  
748  
749  
750  
751  
752  
753  
754  
755  
756  
757  
758  
759  
760  
761  
762  
763  
764  
765  
766  
767  
768  
769  
770  
771  
772  
773  
774  
775  
776  
777  
778  
779  
780  
781  
782  
783  
784  
785  
786  
787  
788  
789  
790  
791  
792  
793  
794  
795  
796  
797  
798  
799  
800  
801  
802  
803  
804  
805  
806  
807  
808  
809  
810  
811  
812  
813  
814  
815  
816  
817  
818  
819  
820  
821  
822  
823  
824  
825  
826  
827  
828  
829  
830  
831  
832  
833  
834  
835  
836  
837  
838  
839  
840  
841  
842  
843  
844  
845  
846  
847  
848  
849  
850  
851  
852  
853  
854  
855  
856  
857  
858  
859  
860  
861  
862  
863  
864  
865  
866  
867  
868  
869  
870  
871  
872  
873  
874  
875  
876  
877  
878  
879  
880  
881  
882  
883  
884  
885  
886  
887  
888  
889  
890  
891  
892  
893  
894  
895  
896  
897  
898  
899  
900  
901  
902  
903  
904  
905  
906  
907  
908  
909  
910  
911  
912  
913  
914  
915  
916  
917  
918  
919  
920  
921  
922  
923  
924  
925  
926  
927  
928  
929  
930  
931  
932  
933  
934  
935  
936  
937  
938  
939  
940  
941  
942  
943  
944  
945  
946  
947  
948  
949  
950  
951  
952  
953  
954  
955  
956  
957  
958  
959  
960  
961  
962  
963  
964  
965  
966  
967  
968  
969  
970  
971  
972  
973  
974  
975  
976  
977  
978  
979  
980  
981  
982  
983  
984  
985  
986  
987  
988  
989  
990  
991  
992  
993  
994  
995  
996  
997  
998  
999  
1000

172           Anti-depressant use, the outcome of our study, was defined, according to the  
173 SPDR, as being dispensed at least one prescription of antidepressants (ATC: N06A) during  
174 the individual one-year follow-up.

175           Previous mental health issues were defined as having any psychiatric disorder  
176 diagnosed at a hospital (ICD: F00-F99) or a dispensed prescription of a psychotropic drug  
177 (ATC: N05A, N05B, N06A) in the past three years.

178           Pregnancies one year previous to baseline and during follow-up were identified  
179 according to the 2019 version of the Nordic Diagnosis-Related Group classification  
180 (NordDRG), Major Diagnostic Categories codes M14 for pregnancy, delivery and post-  
181 partum care.(37)

182           We used family level data on income as of 31 December 2010 from Statistics  
183 Sweden's LISA. Individualized disposable family income was calculated by dividing the total  
184 disposable income of the family by the number of family members, taking into account the  
185 different consumption weights of adults and children determined by Statistics Sweden.  
186 Thereafter, we created three categories (i.e., low, medium, and high) of income using tertile

1  
2  
3 187 cut-offs based on the total Swedish population aged 18 - 80 years. We considered the high-  
4  
5 188 income category as the reference in the comparisons.

6 189 We defined immigrant status at the family level as no family member >18 years  
7  
8 190 of age born in Sweden, since understanding of and access to institutions such as health care  
9  
10 191 differ depending on social position such as it is constructed by the power dimensions of  
11  
12 192 race/immigration, as well as the experience of xenophobia. This variable should therefore be  
13  
14 193 considered as an effort to capture a social position affecting possibilities and life trajectories  
15  
16 194 rather than an essentialist view of otherness. We categorized age at the individual baseline into  
17  
18 195 the following groups: 12 to 17, 18 to 23, and 24 to 30 years to capture age specific conditions  
19  
20 196 of adolescents, young adults, and adult women.

21 197

### 22 198 **Intersectional Strata**

23  
24 199 Within each cohort stratified by previous mental health issues, we generated 36 intersectional  
25  
26 200 strata by combining three categories of age, three categories of income, two categories of  
27  
28 201 immigrant background, and two categories of HC use. Mental health issues can be considered  
29  
30 202 as a valid category of intersectional investigation in a society that considers an able body and  
31  
32 203 mind vital, in other words relating to the power dimension of able-bodiedness,(38, 39).  
33  
34 204 Mental health issues were also included in the analysis since they are a strong determinant of  
35  
36 205 antidepressant use that needs to be addressed. We could consider that over and above  
37  
38 206 individual characteristics, mental illness-related stigma may condition inequities in health  
39  
40 207 care.(40) As with gender or income, able-bodiedness concerning mental health can therefore  
41  
42 208 be conceptualized as a contextual dimension when defining intersectional strata.

43 209

### 44 210 **Statistical analysis**

45 211 We performed an intersectional MAIHDA with individual women at the first level of analysis  
46  
47 212 and the 36 intersectional strata at the second level, stratified by previous mental health issues  
48  
49 213 (See Supplementary material 1-4). The use of antidepressants in the population was thus  
50  
51 214 analysed through two successive multilevel logistic regression models distinguishing between  
52  
53 215 measures of association and measures of variance and discriminatory accuracy.

54 216

#### 55 217 *Model 1*

56 218 The first model included only an intercept and a random effect for the intersectional strata  
57  
58 219 with no covariates. In this model 1 we first (i) performed a simple analysis of components of  
59  
60 220 variance and calculated the Variance Partition Coefficient (VPC). That is, the share

1  
2  
3 221 (expressed as a percentage) of the total individual variance in the latent propensity of  
4 222 antidepressant use that is at the intersectional strata level. In this simple model, the VPC  
5 223 correspond with the Intraclass Correlation Coefficient (ICC) which informs on the clustering  
6 224 of antidepressant use within intersectional strata. The VPC values extend from 0 to 100%.  
7 225 Second, (ii) we calculate the stratum-specific absolute usage of anti-depressants and their  
8 226 95% credible intervals (CI) by transformation of the information from the logistic regression  
9 227 to the probability scale. We used this information to map the user heterogeneity across the  
10 228 intersectional strata. Then, (iii) using these stratum-specific predictions, we calculated the  
11 229 Area Under the receiver operator characteristics Curve (AUC). The AUC informs on the  
12 230 accuracy of the intersectional strata information for discriminating those women who used  
13 231 antidepressants from those who did not. The AUC values extend from 0.5 to 1, where 0.5  
14 232 represent absence of accuracy and 1 represents total accuracy. Both the VPC and the AUC in  
15 233 model 1 can be interpreted as measures of discriminatory accuracy,(41) and inform on the  
16 234 magnitude of the general intersectional effects. The higher the VPC and AUC values, the  
17 235 higher the influence of the intersectional context on individual use of antidepressants. Finally,  
18 236 (iv) we calculated the difference in anti-depressant use and 95% CI between similar pairs of  
19 237 strata differing only on the use of HC. This represents the stratum specific association  
20 238 between HC and antidepressant use.  
21  
22  
23  
24  
25  
26  
27  
28  
29  
30  
31  
32  
33  
34  
35

#### 36 240 *Model 2 or fixed main effects model*

37 241 This model includes the fixed, main effects of all the intersectional dimensions (i.e., age,  
38 242 income, immigrant background, and HC use) used to define the intersectional strata. In model  
39 243 2 we quantified, (i) the association between the intersectional dimensions and use of  
40 244 antidepressants as expressed by odds ratio (OR) and 95% CI. We also calculate (ii) the  
41 245 Proportional Change in the Variance (PCV). The PCV measures the overall proportion of  
42 246 strata variance of model 1 explained by the specific intersectional dimensions. Since model 2  
43 247 contains all the variables used to construct the intersectional strata as main effects, it should  
44 248 explain all the strata variance (i.e., PCV= 100%). If this is not the case, the remaining  
45 249 between strata variance would be due to the existence of multiplicative interaction of effects  
46 250 between the intersectional dimensions defining the strata.(22, 42)  
47  
48  
49  
50  
51  
52  
53  
54

55 251 The AUCs of the models 1 and 2 are expected to be the same because model 2  
56 252 only decomposes the stratum-specific predicted probabilities obtained in model 1 into fixed  
57 253 and random effect components and their sum equals the prediction obtained only by random  
58 254 effects in model 1.

255 We ran the models using MLwiN 3.00 by calling it from within Stata 14.1 using  
 256 the *runmlwin* command.(43) The estimations were performed using Markov chain Monte  
 257 Carlo (MCMC) methods. All points estimations and their 95% credible intervals were based  
 258 on the parameter and random effect chains obtained from the MCMC estimation. See  
 259 elsewhere for further information on the statistical MAIHDA analysis including Stata  
 260 commands,(33, 42) and discussion on the theory and methodological approach.(22, 44)

261

## 262 Patient and Public Involvement statement

263 The research was developed with a grassroots perspective in mind, whereby women's  
 264 experiences of use of hormonal contraception inspired and informed the choice of research  
 265 area and research questions. The anonymised data and scope of the study, including around 1  
 266 million women, prohibited direct patient involvement.

267

## 268 RESULTS

### 269 Characteristics of the population

270 The selection of the study population is shown in Figure 1. Out of the 915 952 women 12.4%  
 271 (n = 113 711) had previous mental health issues. Mean age was somewhat older for women  
 272 with previous mental health issues (22.5 years; SD 4.8) than for those without such concerns  
 273 (20.8 years; SD 5.3). Supplementary material 5 shows pooled statistics for usage of previous  
 274 mental health issues and HC use, while Supplementary material 6 displays a frequency table  
 275 over all included HC. Table 1 displays the baseline characteristics of the population by  
 276 previous mental health issues and use of hormonal contraceptives.

**Table 1.** Characteristics of the 915 954 women aged 12 - 30 years by previous mental health issues and use of hormonal contraceptives. Values are percentages (number of women in parenthesis).

|                                 | Previous mental health issues |                     |                       |                      |
|---------------------------------|-------------------------------|---------------------|-----------------------|----------------------|
|                                 | Yes<br>12.4 (113 711)         |                     | No<br>87.6 (802 243)  |                      |
|                                 | Use of HC                     |                     | Use of HC             |                      |
|                                 | Yes<br>42.5 (48 302)          | No<br>57.5 (65 409) | Yes<br>42.0 (337 297) | No<br>58.0 (464 946) |
| Antidepressant during follow-up | 41.2 (19 886)                 | 39.8 (26 013)       | 2.7 (9 215)           | 1.9 (8 699)          |
| Age                             |                               |                     |                       |                      |
| 12-17 years                     | 14.2 (6 838)                  | 19.4 (12 698)       | 16.7 (56 343)         | 42.1 (195 937)       |
| 18-23 years                     | 48.3 (23 347)                 | 31.2 (20 381)       | 50.1 (168 968)        | 23.3 (108 939)       |

|    |              |               |               |                |                |
|----|--------------|---------------|---------------|----------------|----------------|
| 1  |              |               |               |                |                |
| 2  |              |               |               |                |                |
| 3  | 24-30 years  | 37.5 (18 117) | 49.4 (32 330) | 33.2 (11 986)  | 34.6 (160 616) |
| 4  | Income level |               |               |                |                |
| 5  | Low inc.     | 40.4 (19 513) | 45.6 (29 803) | 31.8 (107 119) | 33.1 (154 098) |
| 6  | Medium inc.  | 27.1 (13 078) | 27.5 (17 954) | 25.4 (85 620)  | 29.5 (137 098) |
| 7  | High inc.    | 32.5 (15 711) | 27.0 (17 652) | 42.9 (144 558) | 37.4 (173 750) |
| 8  | Immigrant    |               |               |                |                |
| 9  | background   |               |               |                |                |
| 10 | None         | 94.6 (45 674) | 89.1 (58 264) | 94.2 (317 716) | 82.6 (383 878) |
| 11 | Yes          | 5.4 (2 628)   | 10.9 (7 145)  | 5.8 (19 581)   | 17.4 (81 068)  |
| 12 |              |               |               |                |                |
| 13 |              |               |               |                |                |
| 14 | 277          |               |               |                |                |
| 15 |              |               |               |                |                |
| 16 | 278          |               |               |                |                |
| 17 |              |               |               |                |                |
| 18 | 279          |               |               |                |                |
| 19 |              |               |               |                |                |
| 20 | 280          |               |               |                |                |
| 21 |              |               |               |                |                |
| 22 | 281          |               |               |                |                |
| 23 |              |               |               |                |                |
| 24 | 282          |               |               |                |                |
| 25 |              |               |               |                |                |
| 26 | 283          |               |               |                |                |
| 27 |              |               |               |                |                |
| 28 | 284          |               |               |                |                |
| 29 |              |               |               |                |                |
| 30 | 285          |               |               |                |                |
| 31 |              |               |               |                |                |
| 32 | 286          |               |               |                |                |
| 33 |              |               |               |                |                |
| 34 | 287          |               |               |                |                |
| 35 |              |               |               |                |                |
| 36 |              |               |               |                |                |
| 37 |              |               |               |                |                |
| 38 |              |               |               |                |                |
| 39 |              |               |               |                |                |
| 40 |              |               |               |                |                |
| 41 |              |               |               |                |                |
| 42 |              |               |               |                |                |
| 43 |              |               |               |                |                |
| 44 |              |               |               |                |                |
| 45 |              |               |               |                |                |
| 46 |              |               |               |                |                |
| 47 |              |               |               |                |                |
| 48 |              |               |               |                |                |
| 49 |              |               |               |                |                |
| 50 |              |               |               |                |                |
| 51 |              |               |               |                |                |
| 52 |              |               |               |                |                |
| 53 |              |               |               |                |                |
| 54 |              |               |               |                |                |
| 55 |              |               |               |                |                |
| 56 |              |               |               |                |                |
| 57 |              |               |               |                |                |
| 58 |              |               |               |                |                |
| 59 |              |               |               |                |                |
| 60 |              |               |               |                |                |

The share of HC users was very similar in healthy women and those with previous mental health issues, 42.0% and 42.5%, respectively. Anti-depressants were dispensed to 2.7% of HC users compared to 1.9% of non-users among healthy women during follow-up. For women with previous mental health issues, 41.2% of HC users and 39.8% of non-users dispensed an anti-depressant prescription. The income levels were generally higher among women without mental health issues, and HC users were somewhat more affluent in both cohorts.

### Results from the MAIHDA

Table 2 shows the results from the MAIHDA distinguishing between measures of association and measures of variance and discriminatory accuracy.

Table 2. Results from the Multilevel Analysis of Individual Heterogeneity and Discriminatory Accuracy (MAIHDA) distinguishing between measures of association (Odds Ratios) and measures of variance and



discriminatory accuracy. The analyses are stratified by the existence of previous mental issues. Values are point estimations (with 95% credible intervals) or percentages where indicated.

|                                                          | Without mental health issues |                  | With mental health issues |                  |
|----------------------------------------------------------|------------------------------|------------------|---------------------------|------------------|
|                                                          | Model 1                      | Model 2          | Model 1                   | Model 2          |
| <b>Measures of association</b>                           |                              |                  |                           |                  |
| <b>Age</b>                                               |                              |                  |                           |                  |
| <i>12-17 years</i>                                       |                              | Reference        |                           | Reference        |
| <i>18-23 years</i>                                       |                              | 1.78 (1.36-2.42) |                           | 1.57 (1.38-1.76) |
| <i>24-30 years</i>                                       |                              | 2.09 (1.65-2.70) |                           | 2.66 (2.36-3.00) |
| <b>Income</b>                                            |                              |                  |                           |                  |
| <i>High inc.</i>                                         |                              | Reference        |                           | Reference        |
| <i>Medium inc.</i>                                       |                              | 1.05 (0.78-1.37) |                           | 0.87 (0.77-0.98) |
| <i>Low inc.</i>                                          |                              | 1.10 (0.81-1.41) |                           | 0.87 (0.77-0.98) |
| <b>Immigrant background</b>                              |                              |                  |                           |                  |
| <i>None</i>                                              |                              | Reference        |                           | Reference        |
| <i>Yes</i>                                               |                              | 0.63 (0.49-0.79) |                           | 0.55 (0.49-0.61) |
| <b>Hormonal contraception</b>                            |                              |                  |                           |                  |
| <i>No</i>                                                |                              | Reference        |                           | Reference        |
| <i>Yes</i>                                               |                              | 1.62 (1.34-2.06) |                           | 1.19 (1.08-1.31) |
| <b>Measures of variance and discriminatory accuracy*</b> |                              |                  |                           |                  |
| Variance                                                 | 0.30 (0.18-0.50)             | 0.10 (0.06-0.18) | 0.29 (0.18-0.49)          | 0.02 (0.01-0.03) |
| VPC                                                      | 8.45%                        | 3.02%            | 8.18%                     | 0.49%            |
| PCV                                                      |                              | 66.29%           |                           | 94.48%           |
| AUC                                                      | 0.62 (0.62-0.62)             | 0.62 (0.62-0.62) | 0.64 (0.64-0.64)          | 0.64 (0.64-0.64) |

\*Between-strata variance, variance partition coefficient (VPC), proportional change of the variance (PCV), Area under the curve (AUC)

288  
 289 Model 1 indicates that 8.45% (without mental health issues) and 8.18% (with previous mental  
 290 health issues) of the total individual variance in the latent propensity of using antidepressant is  
 291 at the intersectional strata level. These VPCs correspond with AUC values of 0.62 and 0.64  
 292 respectively. Both measures suggest the existence of a moderate intersectional effect. The  
 293 PCV was high in both groups, but especially so in the group with previous mental health  
 294 issues, meaning the intersectional dimensions or main effects explain more of the inter-strata  
 295 variance for these women. Model 2 shows that HC was associated with increased usage of  
 296 antidepressants after adjustment for all other intersectional dimensions. This result was seen  
 297 within both cohorts, but more strongly so in women without previous mental health issues

298 (OR 1.62 compared to 1.19). Finally, the VPC in model 2 was very small (3.02% and 0.49%  
 299 respectively) but did not vanish. This finding means that while the intersectional strata effect  
 300 was mainly due the additive effect of variables defining the strata, a small component due to  
 301 interaction of effects could also be detected.

302

### 303 **Heterogeneity concerning antidepressant use in our cohort**

304 Women with previous mental health issues had a much higher usage of antidepressants than  
 305 women without such issues, but the association with HC use nonetheless varied across the  
 306 other intersectional dimensions. Table 3 show the stratum-specific incidence rates for  
 307 antidepressant use and 95% CI obtained in model 1.

308

**Table 3.** Distribution of antidepressant use between different intersectional strata, and difference in usage between user and non-users of hormonal contraceptives but otherwise sharing the same intersectional stratum. The values are calculated from the multilevel analysis of individual heterogeneity and discriminatory accuracy (MAIHDA). Numbers are percentages.

| Previous mental health issues | Age (years) | Income level | Immigrant background | Number of women | Use of hormonal contraceptives (%) |                        |                         |
|-------------------------------|-------------|--------------|----------------------|-----------------|------------------------------------|------------------------|-------------------------|
|                               |             |              |                      |                 | Yes                                | No                     | Yes-No difference       |
| No                            | 12 – 17     | Low          | No                   | 28182           | 3.7                                | 1.3                    | <b>2.4 (1.9 , 2.8)</b>  |
|                               |             |              | Yes                  | 7643            | 1.2                                | 0.5                    | <b>0.7 (0.1 , 1.5)</b>  |
|                               |             | Middle       | No                   | 75836           | 3.0                                | 1.0                    | <b>2.0 (1.8 , 2.3)</b>  |
|                               |             |              | Yes                  | 10110           | 1.8                                | 0.6                    | <b>1.2 (0.5 , 2.1)</b>  |
|                               |             | High         | No                   | 125903          | 2.0                                | 0.9                    | <b>1.1 (0.9 , 1.2)</b>  |
|                               |             |              | Yes                  | 4606            | 2.5                                | 0.8                    | <b>1.6 (0.6 , 2.8)</b>  |
|                               | 18 – 23     | Low          | No                   | 44723           | 3.5                                | 3.0                    | <b>0.5 (0.2 , 0.9)</b>  |
|                               |             |              | Yes                  | 11174           | 2.3                                | 1.2                    | <b>1.1 (0.5 , 1.7)</b>  |
|                               |             | Middle       | No                   | 72018           | 2.8                                | 2.8                    | 0.1 (-0.2 , 0.3)        |
|                               |             |              | Yes                  | 8776            | 2.3                                | 1.2                    | <b>1.1 (0.5 , 1.8)</b>  |
|                               |             | High         | No                   | 136284          | 2.3                                | 2.3                    | 0 (-0.2 , 0.1)          |
|                               |             |              | Yes                  | 4386            | 2.0                                | 1.8                    | <b>0.2 (-0.6 , 0.9)</b> |
| 24 – 30                       | Low         | No           | 130127               | 3.1             | 3.2                                | -0.1 (-0.3 , 0.1)      |                         |
|                               |             | Yes          | 39368                | 2.7             | 1.4                                | <b>1.3 (0.9 , 1.7)</b> |                         |
|                               | Middle      | No           | 45013                | 3.6             | 3.0                                | <b>0.5 (0.2 , 0.9)</b> |                         |
|                               |             | Yes          | 10965                | 2.7             | 2.4                                | 0.4 (-0.3 , 1.1)       |                         |
|                               | High        | No           | 43508                | 2.4             | 2.6                                | -0.2 (-0.5 , 0.1)      |                         |
|                               |             | Yes          | 3621                 | 1.9             | 2.3                                | -0.3 (-1.3 , 0.7)      |                         |
| Yes                           | 12 – 17     | Low          | No                   | 3402            | 30.5                               | 22.7                   | <b>7.8 (4.7 , 10.8)</b> |
|                               |             |              | Yes                  | 434             | 20.8                               | 13.7                   | 7.1 (-0.3 , 15.1)       |
|                               |             | Middle       | No                   | 6854            | 31.2                               | 23.4                   | <b>7.8 (5.6 , 10.1)</b> |

|         |        |     |       |      |      |                          |
|---------|--------|-----|-------|------|------|--------------------------|
|         |        | Yes | 569   | 19.9 | 14.2 | 5.7 (-1.2 , 13.1)        |
|         | High   | No  | 7906  | 34.2 | 28.1 | <b>6.1 (3.9 , 8.3)</b>   |
|         |        | Yes | 371   | 30.4 | 19.8 | <b>10.6 (1.4 , 19.9)</b> |
| 18 – 23 | Low    | No  | 10937 | 39.2 | 37.8 | 1.4 (-0.4 , 3.2)         |
|         |        | Yes | 1127  | 28.5 | 19.7 | <b>8.8 (3.4 , 14.4)</b>  |
|         | Middle | No  | 12915 | 37.8 | 36.3 | 1.5 (-0.2 , 3.1)         |
|         |        | Yes | 844   | 27.4 | 19.7 | <b>7.7 (1.9 , 13.7)</b>  |
|         | High   | No  | 17276 | 38.3 | 39.8 | -1.5 (-3 , 0)            |
|         |        | Yes | 629   | 28.1 | 25.4 | 2.8 (-4 , 9.4)           |
| 24 – 30 | Low    | No  | 29333 | 50.1 | 49.9 | 0.2 (-1 , 1.4)           |
|         |        | Yes | 4083  | 37.3 | 32.4 | <b>4.9 (1.5 , 8.4)</b>   |
|         | Middle | No  | 8629  | 49.7 | 50.8 | -1.1 (-3.4 , 1.1)        |
|         |        | Yes | 1221  | 33.5 | 37.1 | -3.6 (-10 , 2.6)         |
|         | High   | No  | 6686  | 48.5 | 48.9 | -0.4 (-2.9 , 2)          |
|         |        | Yes | 495   | 43.7 | 37.5 | 6.3 (-3.2 , 15.8)        |

309

310

311 The highest use of anti-depressants were observed in non-immigrant women, aged 24-30,  
 312 with previous mental health issues, using HC and with low income (50.1%). The lowest usage  
 313 were found in teenagers without previous mental health issues and no HC use, especially in  
 314 the strata of immigrant girls from low (0.50%) and middle-income (0.60%) households.

315

### 316 **Heterogeneity concerning the association between hormonal contraceptive and** 317 **antidepressant use**

318 Overall, the propensity to use antidepressants was consistently higher in HC users compared  
 319 to non-users in younger women between 12 and 17 years of age, both without previous mental  
 320 health issues (0.7 – 2.4 percentage points), and with a mental health history (5.7 – 7.8  
 321 percentage points) with the magnitude being higher in the latter group. However, the 95%  
 322 credible intervals were broad since the number of individuals was relatively small in these  
 323 latter strata. Table 3 gives detailed information on these associations. In adolescents the  
 324 tendency was that an immigrant background lowered the use of anti-depressants, while the  
 325 opposite was true for adult women, where a positive association between HC use and later  
 326 antidepressant use was mainly found in women with low income and immigrant background,  
 327 again with higher magnitudes in women with previous mental health issues. The association  
 328 between HC and antidepressant use was smaller in adult women native to Sweden no matter  
 329 their income, and completely disappeared in adult women with high income regardless of  
 330 immigrant background.

331

**DISCUSSION**

The main hypothesis of our study was that the previously observed association between HC and antidepressant use, mainly seen in adolescent girls(6-9, 17, 45), would be modified by the intersectional context of the women, being more pronounced in more oppressed intersectional contexts. We confirmed that subsequent use of anti-depressants after an HC prescription compared to non-users of HC within the same intersectional context was heterogeneous across intersectional strata pairs. As hypothesized, the difference in propensity to use anti-depressants was more pronounced in more oppressed intersectional contexts like those composed by immigrant, low-income women with previous mental issues. That is, the use of antidepressants and to some extent the difference in use between HC users and non-users varied mainly depending on previous mental health issues, but the HC-antidepressant association was considerably modified across pair of strata with other characteristics equal but where HC use and non-use differed, in both cohorts. Aside from adolescent girls, low and middle income adult women with immigrant background had a more pronounced difference in propensity for using anti-depressants, while adult women without immigrant background had both the lowest anti-depressant use and a low grade of modification by HC use.

Independently of previous mental health issues, the propensity for using anti-depressants was consistently higher for HC users than for non-users in teenagers aged 12-17, a result aligned with previous studies that has found a heterogeneous response with regard to both age and other factors.(6, 7, 17, 18, 20, 45-47) As discussed in a previous paper, this higher risk for adolescents could be due to a *selective discontinuation bias*,<sup>(7)</sup> a development of the *healthy worker survivor effect*, describing how bias is introduced through a continuous selection where those staying in the workforce are healthier than those who leave.<sup>(48)</sup> Women who experience a negative influence of HC on psychological health might discontinue treatment in early ages, while those without symptoms continued on HC into adulthood, creating this age-dependent *selective discontinuation bias*. This could explain why the observed association between HC and adverse mental health outcomes are stronger in adolescents. Most Swedish women do however continue their HC treatment with the same method.<sup>(49)</sup> A previous study found that new users of HC has a higher risk of obtaining antidepressants within the first six months of HC use than continuous users.<sup>(6)</sup> To address this possible bias we ran a sensitivity analysis differentiating between women who filed a first prescription of an HC for the first time during the study period (26.2% of HC users) and those

1  
2  
3 364 that had a repeat prescription. The results showed that in our cohort the association between  
4  
5 365 HC use and subsequent anti-depressant use was very similar in new and continuous users  
6  
7 366 (Odds Ratio 1.52 and 1.45, respectively, with overlapping 95% confidence intervals).

8  
9 367 As expected, among adult women the overall propensity for using anti-depressants  
10  
11 368 was higher, as it is known that anti-depressant use increases by age,(50,51) and the difference  
12  
13 369 between HC users and non-users was smaller. Women native to Sweden had a higher  
14  
15 370 propensity for using anti-depressants, but this was moderated by HC exposure to a lower  
16  
17 371 extent than for immigrant women. In adult women native to Sweden, HC use gave no increase  
18  
19 372 of antidepressant use among those with high income. The lower utilization of anti-depressants  
20  
21 373 does not necessarily mean that immigrant women are healthier, since earlier studies have  
22  
23 374 found immigrants utilize healthcare to a lesser extent, even though the need is pronounced,  
24  
25 375 with reasons including discrimination.(52,53) A recent study found that adjustment for  
26  
27 376 health care access eliminated the association between HC initiation and subsequent anti-  
28  
29 377 depressant use in a US population.(54) Although the health care system is different in Sweden  
30  
31 378 and visits to midwives for contraceptive purposes free, we conducted a sensitivity analysis  
32  
33 379 including only women who had accessed health care within the last three years to address this.  
34  
35 380 Using only care-accessors as the reference group did not change our results in any substantive  
36  
37 381 way, see Supplementary material 7 .

### 382 **Intersectional considerations**

383 The big difference in anti-depressant consumption depending on HC use for lower income  
384  
385 immigrant women could be interpreted as the intersectional contexts embodied by these  
386  
387 women are more susceptible to the potential detrimental effect of HC on mood. The  
388  
389 interrelating negative consequences of low income as a proxy for class or social position,  
390  
391 gender and xenophobia may accumulate over the life course and lead to a higher vulnerability  
392  
393 to exposures that predispose for antidepressant use later in life,(55-57) whereas this diverse  
394  
395 vulnerability to HC exposure might not be visible in teenagers. Social experiences can vary  
396  
397 depending on for example social position, which in turn impact psychological development,  
398  
399 mood and cognition, thus influencing health.(58, 59) In understanding how HC can impact  
400  
401 women's mental health differently, both possible individual biological predispositions and  
402  
403 social settings need to be investigated, since the emotional response to HC is influenced by  
404  
405 context.(32) In other words, the interlocking power axes that create oppression could  
406  
407 predispose women already under structural burdens for adverse mental health reactions when  
408  
409 using HC. The fact that adult women native to Sweden were almost unaffected by HC use,

1  
2  
3 397 could strengthen this suggestion. Without the intersectional strata this disparity would not  
4  
5 398 have been so easily identified and visualized.

6  
7 399 Focusing on women whose lives are affected by several interlocking power  
8  
9 400 dimensions such as low social position and xenophobia is fundamental to achieving  
10  
11 401 reproductive justice.(30) Nonetheless, our intersectional strata should not be considered static  
12  
13 402 categories of inherently “risky identities” but must be interpreted as context specific  
14  
15 403 vulnerabilities of women within certain interlocking positions, constituted in relation to power  
16  
17 404 dynamics created by unequal schemes such as the economic system.(25, 29) It is likely that in  
18  
19 405 other contexts, other groups could be more vulnerable. It is also important to remember that  
20  
21 406 the purpose of HC most commonly is protection against unwanted pregnancy, a situation that  
22  
23 407 if it arises in itself can have negative mental health effects. In identifying the underlying  
24  
25 408 power systems creating these intersectional categories and acknowledging their constant  
26  
27 409 movement and changing dynamics on a societal level, it furthermore becomes possible to  
28  
29 410 address these inequalities through social change.

30  
31 411 In this study, we have combined a classical epidemiological approach of  
32  
33 412 exposure to HC and an intersectional MAHIDA to create a novel understanding of how  
34  
35 413 intersecting power dynamics could create particular vulnerabilities to this specific exposure.  
36  
37 414 Because of our study design, where women are followed for one year after a dispensed  
38  
39 415 prescription of HC, it is more theoretically coherent to view use of HC as an exposure rather  
40  
41 416 than a component of the intersectional strata. However, it is possible to within our approach  
42  
43 417 view HC use as a socio-contextual factor that captures certain living conditions (for example  
44  
45 418 more likely to be sexually active or in a heterosexual relationship), which somewhat changes  
46  
47 419 the interpretation of the results. This epistemological tension is not necessarily a limitation,  
48  
49 420 but could enrich the dialogue in social epidemiology on whether it is possible to separate  
50  
51 421 contextual factors from “pure” exposure.(60-62)

## 52 422 **Limitations**

53  
54 423 The findings from this study must be interpreted in the context of its limitations. The SPDR  
55  
56 424 has highly reliable data on dispensed prescriptions but cannot measure the actual use of  
57  
58 425 dispensed medications. Along the same line of reasoning, whether the women was exposed to  
59  
60 426 HC treatment during her entire follow-up is not possible to determine with our method,  
61  
62 427 although previous Swedish data suggest continuation rates for any HC after 6 months are  
63  
64 428 almost 90%.(47) Use of anti-depressants can be considered a proxy for depression, but anti-  
65  
66 429 depressants are also prescribed for other reasons than depression, including generalized

1  
2  
3 430 anxiety disorder, obsessive-compulsive disorder and panic disorder.(63) Therefore it is not a  
4  
5 431 perfect proxy of depression but may be a more general indication of impaired mental  
6  
7 432 health.(64) However, out of all women with potentially unfavorable mental health effects  
8  
9 433 from HC, only a subset would have symptoms severe enough to get an anti-depressant  
10  
11 434 prescription, leading instead to many missed cases. Since the outcome is rather common, the  
12  
13 435 risk of underestimation is further enhanced and the true risk of adverse mental health effects  
14  
15 436 could be higher.

16 437 As in any observational study, ours only allows for measurements of  
17  
18 438 associations and cannot determine causation. Furthermore, apparently strong average  
19  
20 439 associations do not necessarily convey a high discriminatory accuracy (see elsewhere for a  
21  
22 440 short review and discussion).(65) Nevertheless, since our analysis yielded a moderate  
23  
24 441 accuracy (i.e., AUC=0.6), the intersectional strata do matter for the propensity to use  
25  
26 442 antidepressants. A consideration in every quantitative intersectional study is the basis for  
27  
28 443 creating intersectional categories, since comprehensive information on background and lived  
29  
30 444 experiences are lacking and the categories are created based on available but crude proxies  
31  
32 445 such as income level. For example, in our study the group of women with immigrant  
33  
34 446 background was very heterogenous, so we cannot exclude that the increased antidepressant  
35  
36 447 use is located on more specific country of birth categories. There is an ongoing debate  
37  
38 448 whether these crude categorizations are feasible, and extra caution should be taken when  
39  
40 449 investigating emerging intersectional categories rather than established ones.(66)

## 450 **Conclusion**

41 451 It is important to recognise intersectional perspectives and interacting axes of oppression to  
42  
43 452 tailor better public health interventions, as well as acknowledging the experiences of  
44  
45 453 oppressed women to reach reproductive and social justice. (29, 66) Our intersectional  
46  
47 454 MAIHDA methodology operationalizes this idea by providing information on the  
48  
49 455 discriminatory accuracy of the contexts that define the intersectional strata. It highlights the  
50  
51 456 need to consider disadvantages consisting of several interlocking structural dimensions such  
52  
53 457 as income/class, age and immigration to better understand how HC might predispose certain  
54  
55 458 women, mainly teenagers and low-income women with immigrant background, for  
56  
57 459 depression. These vulnerabilities are based in inequalities that are not static, but structurally  
58  
59 460 created and therefore possible to redeem.

60 461

1  
2  
3 4624  
5 4636  
7 464 **Figure 1.** Selection of the study population.8  
9 46510  
11 46612 467 **Acknowledgements**

13  
14 468 A previous version of this study was presented as a poster at the Gynecological  
15 469 Endocrinology, the 19th World Congress in December 2020. We thank all colleagues at the  
16 470 Unit for Social epidemiology, Lund university, for valuable discussions.

17  
18 47119  
20  
21 472 **Ethical statement**

22 473 The database was approved by the Regional Ethical Review Board in Lund, Sweden, the Data  
23 474 Safety Board at Statistics Sweden and the National Board of Health and Welfare (Dnr: 2014/  
24 475 856, 2015/341).

25  
26 47627  
28  
29 477 **Funding statement**

30  
31 478 This work was supported by The Swedish Research Council (Vetenskapsrådet) grant number:  
32 479 [2017-01321] <https://www.swecris.se/betasearch/details/project/201701321VR>

33  
34 48035  
36 481 **Competing interests**

37  
38 482 None declared.

39  
40 48341  
42 484 **Data sharing statement**

43 485 Public access to the data is restricted by the Swedish Authorities (Public Access to  
44 486 Information and Secrecy Act; [http://www.government.se/information-](http://www.government.se/information-material/2009/09/public-access-to-information-and-secrecy-act/)  
45 487 [material/2009/09/public-access-to-information-and-secrecy-act/](http://www.government.se/information-material/2009/09/public-access-to-information-and-secrecy-act/)) but data can be made  
46 488 available for researchers after a special review that includes approval of the research project  
47 489 by both an Ethics Committee and the authorities' data safety committees. The National Board  
48 490 of Health and Welfare is a government agency under the Ministry of Health and Social  
49 491 Affairs. It is not their policy to provide individual level data to researchers abroad. Instead,  
50 492 they normally advise researchers in other countries to cooperate with Swedish colleagues, to  
51 493 whom they can provide data according to standard legal provisions and procedures. Requests  
52 494 for access to the data can be made to the National Board of Health and Welfare and Statistics



1  
2  
3 495 Sweden (<http://www.socialstyrelsen.se/statistics>; [https://www.scb.se/en/services/guidance-](https://www.scb.se/en/services/guidance-for-researchers-and-universities/)  
4 496 [for-researchers-and-universities/](https://www.scb.se/en/services/guidance-for-researchers-and-universities/)).

5 497

6  
7  
8 498 **Contributorship statement**

9  
10 499 **Sofia Zettermark:** Conceptualization, design, analysis, interpretation of data, writing original  
11 500 draft, final approval of version to be published.

12 501 **Kani Kahlaf:** Interpretation of data, revising draft critically for intellectual content, final  
13 502 approval of version to be published.

14 503 **Raquel Perez-Vicente:** Design, analysis, interpretation of data, revising draft critically for  
15 504 intellectual content, final approval of version to be published.

16 505 **George Leckie:** Analysis, interpretation of data, revising draft critically for intellectual  
17 506 content, final approval of version to be published.

18 507 **Diana Mulinari:** Interpretation of data, revising draft critically for intellectual content, final  
19 508 approval of version to be published.

20 509 **Juan Merlo:** Conceptualization, design, analysis, interpretation of data, revising draft  
21 510 critically for intellectual content, final approval of version to be published.

22 511

23 512

24 513

25 514 **REFERENCES**

26 515 1 Bitzer J. Hormonal contraception and depression: another Pill scandal? *Eur J Contracept*  
27 516 *Repr* 2017;22(1):1-2.

28 517 2 Frokjaer VG. Pharmacological sex hormone manipulation as a risk model for depression. *J*  
29 518 *Neurosci Res* 2020;98(7):1283-92.

30 519 3 Rosenberg MJ, Waugh MS. Oral contraceptive discontinuation: a prospective evaluation of  
31 520 frequency and reasons. *Am J Obstet Gynecol* 1998;179(3;1):577-82.

32 521 4 Simmons RG, Sanders JN, Geist C, et al. Predictors of contraceptive switching and  
33 522 discontinuation within the first 6 months of use among Highly Effective Reversible  
34 523 Contraceptive Initiative Salt Lake study participants. *Am J Obstet Gynecol*  
35 524 2019;220(4):376e1-e12.

36 525 5 Sanders SA, Graham CA, Bass JL, et al. A prospective study of the effects of oral  
37 526 contraceptives on sexuality and well-being and their relationship to discontinuation.  
38 527 *Contraception* 2001;64(1):51-8.

39 528 6 Skovlund CW, Mørch LS, Kessing LV, et al. Association of Hormonal Contraception With  
40 529 Depression. *JAMA Psychiat* 2016;73(11):1154-62.

41 530 7 Zettermark S, Perez Vicente R, Merlo J. Hormonal contraception increases the risk of  
42 531 psychotropic drug use in adolescent girls but not in adults: A pharmacoepidemiological study  
43 532 on 800 000 Swedish women. *PLoS One* 2018;13(3):e0194773  
44 533 doi:10.1371/journal.pone.0194773.

- 1  
2  
3 534 8 Zethraeus N, Dreber A, Ranehill E, et al. A first-choice combined oral contraceptive  
4 535 influences general well-being in healthy women: a double-blind, randomized, placebo-  
5 536 controlled trial. *Fertil Steril* 2017;107(5):1238-45.
- 6 537 9 Lundin C, Malmborg A, Slezak J, et al. Sexual function and combined oral contraceptives -  
7 538 a randomised, placebo-controlled trial. *Endocr Connect* 2018;7(11):1208-1216  
8 539 doi:10.1530/EC-18-0384
- 9 540 10 Gingnell M, Engman J, Frick A, et al. Oral contraceptive use changes brain activity and  
10 541 mood in women with previous negative affect on the pill--a double-blinded, placebo-  
11 542 controlled randomized trial of a levonorgestrel-containing combined oral contraceptive.  
12 543 *Psychoneuroendocrino* 2013;38(7):1133-44.
- 13 544 11 Fisher PM, Larsen CB, Beliveau V et al. Pharmacologically Induced Sex Hormone  
14 545 Fluctuation Effects on Resting-State Functional Connectivity in a Risk Model for Depression:  
15 546 A Randomized Trial. *Neuropsychopharmacol* 2017;42(2):446-53.
- 16 547 12 Toffoletto S, Lanzenberger R, Gingnell M, et al. Emotional and cognitive functional  
17 548 imaging of estrogen and progesterone effects in the female human brain: A systematic review.  
18 549 *Psychoneuroendocrino* 2014;50:28-52.
- 19 550 13 Schaffir J, Worly BL, Gur TL. Combined hormonal contraception and its effects on mood:  
20 551 a critical review. *Eur J Contracept Repr* 2016;21(5):347-55.
- 21 552 14 Robakis T, Williams KE, Nutkiewicz L, et al. Hormonal Contraceptives and Mood:  
22 553 Review of the Literature and Implications for Future Research. *Curr Psychiat Rep*  
23 554 2019;21(7):57. doi:10.1007/s11920-019-1034-z
- 24 555 15 Lewis CA, Kimmig AS, Zsido RG, et al. Effects of Hormonal Contraceptives on Mood: A  
25 556 Focus on Emotion Recognition and Reactivity, Reward Processing, and Stress Response.  
26 557 *Curr Psychiat Rep* 2019;21(11):115.
- 27 558 16 Worly BL, Gur TL, Schaffir J. The relationship between progestin hormonal contraception  
28 559 and depression: a systematic review. *Contraception* 2018;97(6):478-89.
- 29 560 17 de Wit AE, Booij SH, Giltay EJ, et al. Association of Use of Oral Contraceptives With  
30 561 Depressive Symptoms Among Adolescents and Young Women. *JAMA Psychiat*  
31 562 2020;77(1):52-59 doi:10.1001/jamapsychiatry.2019.2838
- 32 563 18 Gregory ST, Hall K, Quast T, et al. Hormonal Contraception, depression, and Academic  
33 564 Performance among females attending college in the United States. *Psychiat Res*  
34 565 2018;270:111-6.
- 35 566 19 Lundin C, Danielsson KG, Bixo M, et al. Combined oral contraceptive use is associated  
36 567 with both improvement and worsening of mood in the different phases of the treatment cycle -  
37 568 A double-blind, placebo-controlled randomized trial. *Psychoneuroendocrino* 2017;76:135-43.
- 38 569 20 Bengtsson H, Lundin C, Gemzell Danielsson K, Bixo M, Baumgart J, Marions L, et al.  
39 570 Ongoing or previous mental disorders predispose to adverse mood reporting during combined  
40 571 oral contraceptive use. *Eur J Contracept Repr* 2018;23(1):45-51.
- 41 572 21 Wemrell M, Mulinari S, Merlo J. An intersectional approach to multilevel analysis of  
42 573 individual heterogeneity (MAIH) and discriminatory accuracy. *Soc Sci Med* 2017;178:217-9.
- 43 574 22 Merlo J. Multilevel analysis of individual heterogeneity and discriminatory accuracy  
44 575 (MAIHDA) within an intersectional framework. *Soc Sci Med* 2018;203:74-80.
- 45 576 23 Evans CR, Williams DR, Onnela JP, et al. A multilevel approach to modeling health  
46 577 inequalities at the intersection of multiple social identities. *Soc Sci Med* 2018;203:64-73.
- 47 578 24 Bauer GR. Incorporating intersectionality theory into population health research  
48 579 methodology: Challenges and the potential to advance health equity. *Soc Sci Med*  
49 580 2014;110:10-7.
- 50 581 25 McCall L. The complexity of intersectionality. *Signs* 2005;30:1771-800.
- 51  
52  
53  
54  
55  
56  
57  
58  
59  
60

- 1  
2  
3 582 26 Evans CR, Erickson N. Intersectionality and depression in adolescence and early  
4 583 adulthood: A MAIHDA analysis of the national longitudinal study of adolescent to adult  
5 584 health, 1995-2008. *Soc Sci Med* 2019;220:1-11.
- 6 585 27 Crenshaw K. Mapping the Margins: Intersectionality, Identity Politics, and Violence  
7 586 against Women of Color. *Stanford Law Rev* 1991;43(6):1241-99.
- 8 587 28 Cho S, Crenshaw K, McCall L. Toward a field of Intersectionality Studies: Theory,  
9 588 Applications and Praxis. *Signs* 2013;38(4):785-810.
- 10 589 29 Price K. It's Not Just About Abortion: Incorporating Intersectionality in Research  
11 590 About Women of Color and Reproduction. *Women Health Iss* 2011;21(3):55-7.
- 12 591 30 Ross LJ, Rickie S. Reproductive Justice: An Introduction. Oakland, CA: University of  
13 592 California Press 2017:1-360.
- 14 593 31 Dehlendorf C, Ruskin R, Grumbach K, et al. Recommendations for intrauterine  
15 594 contraception: a randomized trial of the effects of patients' race/ethnicity and socioeconomic  
16 595 status. *Am J Obstet Gynecol* 2010;203(4):319e1-8.
- 17 596 32 Montoya ER, Bos PA. How Oral Contraceptives Impact Social-Emotional Behavior and  
18 597 Brain Function. *Trends Cogn Sci* 2017;21(2):125-36.
- 19 598 33 Persmark A, Wemrell M, Zettermark S, et al. Precision public health: Mapping  
20 599 socioeconomic disparities in opioid dispensations at Swedish pharmacies by Multilevel  
21 600 Analysis of Individual Heterogeneity and Discriminatory Accuracy (MAIHDA). *PLoS One*  
22 601 2019;14(8):e0220322 doi:10.1371/journal.pone.0220322
- 23 602 34 Hernandez-Yumar A, Wemrell M, Abasolo Alesson I, et al. Socioeconomic differences in  
24 603 body mass index in Spain: An intersectional multilevel analysis of individual heterogeneity  
25 604 and discriminatory accuracy. *PLoS One* 2018;13(12):e0208624.
- 26 605 35 Lorant V, Deliège D, Eaton W, et al. Socioeconomic inequalities in depression: a meta-  
27 606 analysis. *Am J Epidemiol* 2003;157(2):98-112.
- 28 607 36 Dehlendorf C, Rodriguez MI, Levy K, et al. Disparities in family planning. *Am J Obstet*  
29 608 *Gynecol* 2010;202(3):214-20.
- 30 609 37 Swedish National Board of Health and Welfare. DRG-koder och text 2019 [DRG codes  
31 610 and text 2019]. Available from: <https://www.socialstyrelsen.se/utveckla-verksamhet/e-halsa/klassificering-och-koder/drg/drg-koder-och-definitioner/>. [Accessed 2020 Dec 15]
- 32 611 38 Hankivsky O. Women's health, men's health, and gender and health: Implications of  
33 612 intersectionality. *Soc Sci Med* 2012;74(11):1712- 20.
- 34 613 39 Frederick A, Shrifrer D. Race and Disability: From Analogy to Intersectionality. *Sociology*  
35 614 *of Race and Ethnicity* 2019;5(2):200-14.
- 36 615 40 Knaak S, Mantler E, Szeto A. Mental illness-related stigma in healthcare: Barriers to  
37 616 access and care and evidence-based solutions. *Healthcare Management Forum*  
38 617 2017;30(2):111-6.
- 39 618 41 Merlo J, Wagner P, Ghith N, et al. An Original Stepwise Multilevel Logistic Regression  
40 619 Analysis of Discriminatory Accuracy: The Case of Neighbourhoods and Health. *PLoS One*  
41 620 2016;11(4):e0153778.
- 42 621 42 Axelsson Fisk S, Mulinari S, Wemrell M, et al. Chronic Obstructive Pulmonary Disease in  
43 622 Sweden: An intersectional multilevel analysis of individual heterogeneity and discriminatory  
44 623 accuracy. *SSM Population Health* 2018;4:334-46.
- 45 624 43 Leckie G, Charlton C. Runmlwin - a program to Run the MLwiN multilevel modelling  
46 625 software from within stata. *J Stat Softw* 2013;52(11):1-40.
- 47 626 44 Evans CR, Leckie G, Merlo J. Multilevel versus single-level regression for the analysis of  
48 627 multilevel information: The case of quantitative intersectional analysis. *Soc Sci Med*  
49 628 2020;245:112499 doi:10.1016/j.socscimed.2019.112499.
- 50 629
- 51  
52  
53  
54  
55  
56  
57  
58  
59  
60

- 1  
2  
3 630 45 Fruzzetti F, Fidecicchi T. Hormonal Contraception and Depression: Updated Evidence and  
4 631 Implications in Clinical Practice. *Clin Drug Investig.* 2020;40(12):1097-1106 doi:  
5 632 10.1007/s40261-020-00966-8.
- 6  
7 633 46 Segebladh B, Borgström A, Odling V, et al. Prevalence of psychiatric disorders and  
8 634 premenstrual dysphoric symptoms in patients with experience of adverse mood during  
9 635 treatment with combined oral contraceptives. *Contraception* 2009;79(1):50-5.
- 10 636 47 Borgström A, Odling V, Ekselius L, et al. Adverse mood effects of combined oral  
11 637 contraceptives in relation to personality traits. *Eur J Obstet Gyn R B* 2008;141(2):127-30.
- 12 638 48 Arrighi HM, Hertz-Picciotto I. The evolving concept of the healthy worker survivor effect  
13  
14 639 *Epidemiology* 1995;5(2):189-96 doi: 10.1097/00001648-199403000-00009.
- 15 640 49 Josefsson A, Wiréhn A-B, Lindberg M, et al. Continuation rates of oral hormonal  
16 641 contraceptives in a cohort of first-time users: a population-based registry study, Sweden  
17 642 2005–2010. *BMJ Open* 2013;3:e003401 doi:10.1136/bmjopen-2013-003401
- 18  
19 643 50 Carlsten A, Waern M, Ekedahl A, et al. Antidepressant medication and suicide in Sweden.  
20 644 *Pharmacoeconom Dr S* 2001;10(6):525-30.
- 21 645 51 Kalmar S, Szanto K, Rihmer Z, et al. Antidepressant prescription and suicide rates: effect  
22 646 of age and gender. *Suicide Life Threat* 2008;38(4):363-74.
- 23 647 52 Mangrio E, Carlson E, Zdravkovic S. Understanding experiences of the Swedish health  
24 648 care system from the perspective of newly arrived refugees. *BMC Research Notes*  
25 649 2018;11(1):616.
- 26 650 53 Kirmayer LJ, Narasiah L, Munoz M, et al. Common mental health problems in immigrants  
27 651 and refugees: general approach in primary care. *Can Med Assoc J* 2011;183(12):E959-67.
- 28 652 54 Ditch S, Roberts TA, Hansen S. The influence of health care utilization on the association  
29 653 between hormonal contraception initiation and subsequent depression diagnosis and  
30 654 antidepressant use. *Contraception* 2020;101(4):237-43.
- 31 655 55 Brenner H. Political economy and health. In: Amick III B, Levine S, Tarlov A, et al, eds.  
32 656 Society and health. New York, NY: Oxford university press 1995:211–46.
- 33 657 56 Lynch JW, Kaplan GA, Salonen JT. Why do poor people behave poorly? Variation in  
34 658 adult health behaviours and psychosocial characteristics by stages of the socioeconomic  
35 659 lifecourse. *Soc Sci Med* 1997;44(6):809-19.
- 36 660 57 Collins PY, von Unger H, Armbrister A. Church ladies, good girls, and locas: stigma and  
37 661 the intersection of gender, ethnicity, mental illness, and sexuality in relation to HIV risk. *Soc*  
38 662 *Sci Med* 2008;67(3):389-97.
- 39 663 58 Honjo K. Social epidemiology: Definition, history, and research examples. *Environ Health*  
40 664 *Prev* 2004;9(5):193-9.
- 41 665 59 Kubzansky L, Kawachi I. Affective States and Health. In: Berkman L, Kawachi I, eds.  
42 666 Social epidemiology. New York, NY: Oxford University Press 2000:13–41.
- 43 667 60 Krieger N. Epidemiology and the Peoples Health - Theory and Context. Oxford: Oxford  
44 668 University Press 2011:1-381.
- 45 669 61 Krieger N. Epidemiology and social sciences: towards a critical reengagement in the 21st  
46 670 century. *Epidemiol Rev* 2000;22(1):155-63.
- 47 671 62 Link B, Phelan J. Social conditions as fundamental causes of disease. *J Health Soc Behav*  
48 672 1995(Extra Issue:Forty Years of Medical Sociology):80-94
- 49 673 59 Schatzberg AF. New indications for antidepressants. *J Clin Psychiat* 2000;61(Suppl)11:9-  
50 674 17.
- 51 675 63 Gardarsdottir H, Heerdink ER, van Dijk L, et al. Indications for antidepressant drug  
52 676 prescribing in general practice in the Netherlands. *J Affect Disorders* 2007;98(1-2):109-15.
- 53  
54  
55  
56  
57  
58  
59  
60

1  
2  
3 677 64 Merlo J, Mulinari S, Wemrell M, et al. The tyranny of the averages and the indiscriminate  
4 678 use of risk factors in public health: The case of coronary heart disease. *SSM Population*  
5 679 *Health* 2017;3:684-98 doi:10.1016/j.ssmph.2017.08.005

6 680 65 Warner LR. A Best Practices Guide to Intersectional Approaches in Psychological  
7 681 Research. *Sex Roles* 2008;59:454-63.

8 682 66 Marmot M. Social justice, epidemiology and health inequalities. *Eur J Epidemiol*  
9 683 2017;32(7):537-46.

10 684

11 685

12 686

13 687

14 688

15 689

16 690

17 691

18 692

19 693

20 694

21 695

22 696

23 697

24 698

25 699

26 700

27

28

29

30

31

32

33

34

35

36

37

38

39

40

41

42

43

44

45

46

47

48

49

50

51

52

53

54

55

56

57

58

59

60

For peer review only

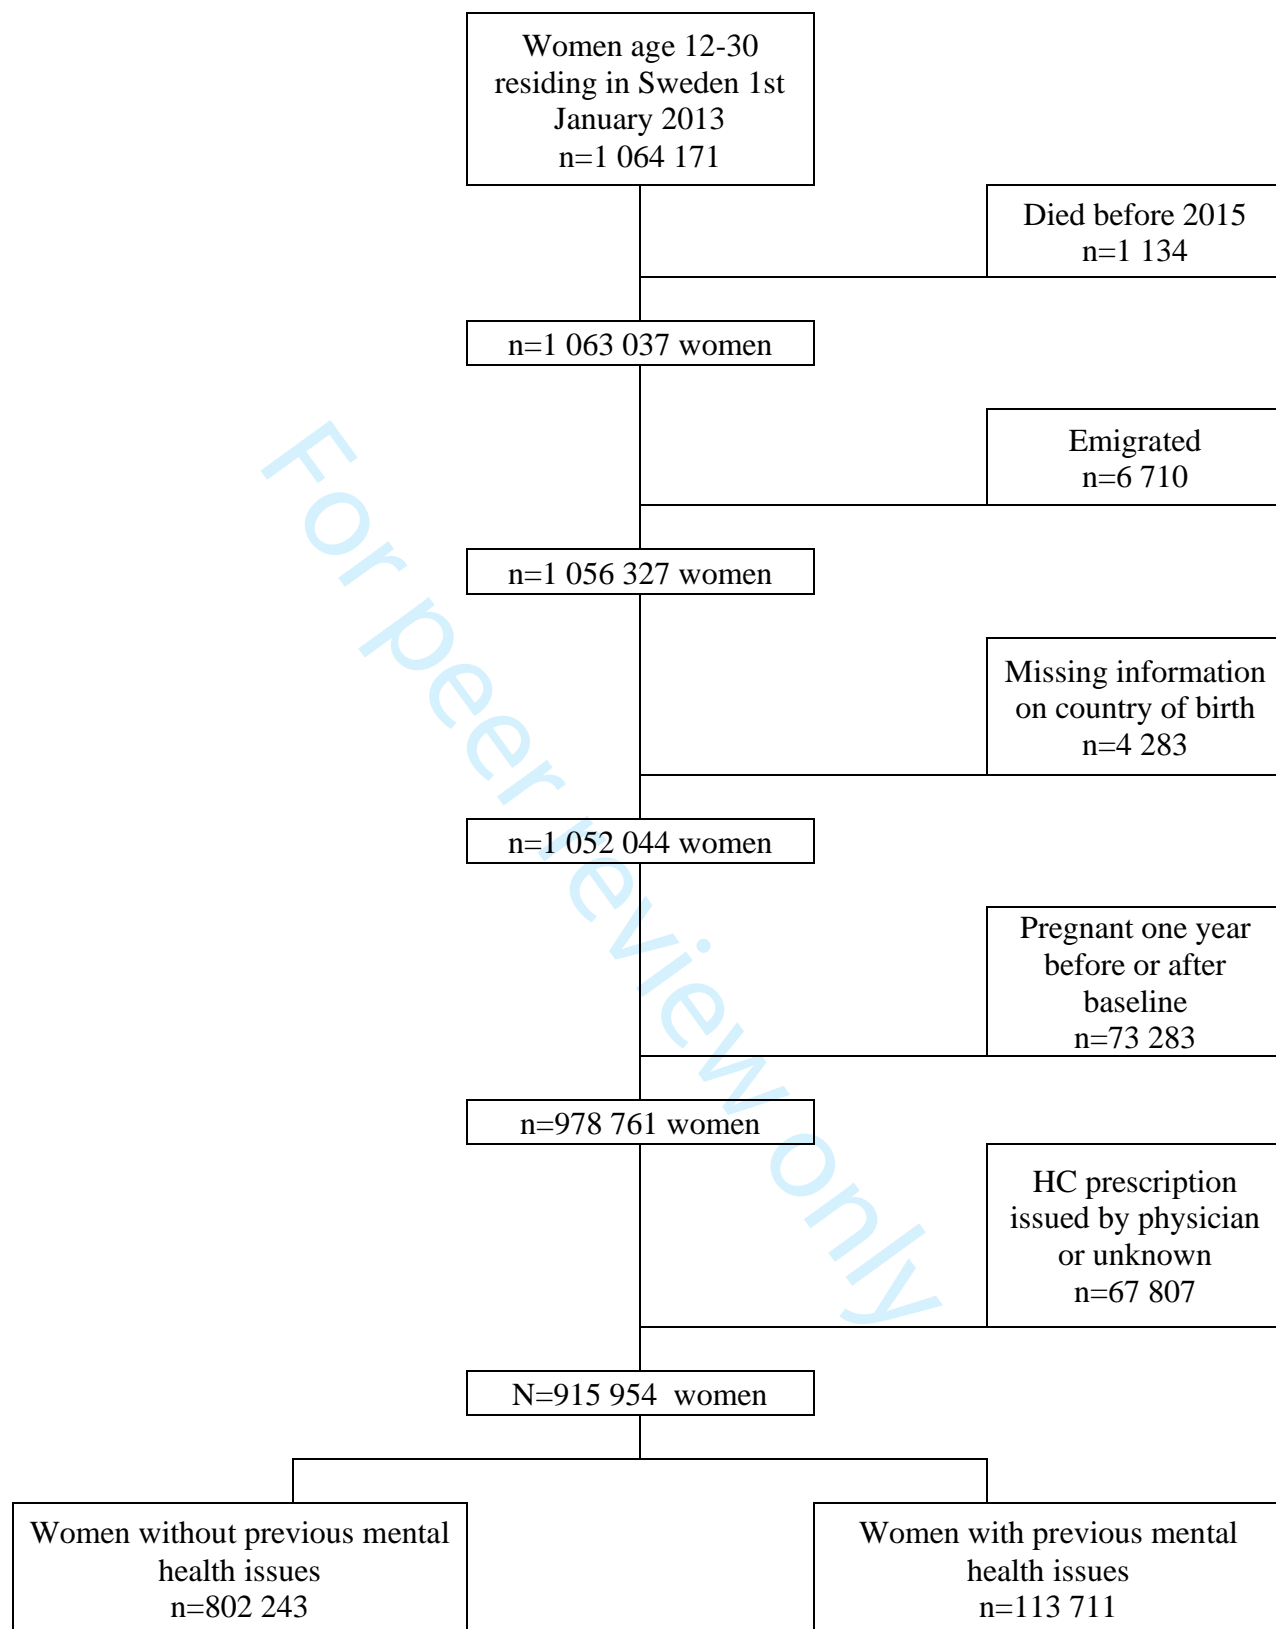

**Figure 1.** Selection of the study population.

```

1
2
3 * Hormonal Contraception and Antidepressant Use in Sweden: An
4 Intersectional Multilevel Analysis of Individual Heterogeneity and
5 Discriminatory Accuracy
6 * (MAIHDA)
7 *****
8 clear *
9 global MLwiN_path "C:\Program Files\MLwiN v3.05\mlwin.exe"
10 set cformat %9.2f
11
12
13 *****
14 * TABLE 1
15 *****
16
17 * Load the data
18 use "final_mlMENTAL.dta", clear
19 keep age_cat1 age_cat2 age_cat3 inc1 inc2 inc3 imm pp proportion denom
20 order age_cat1 age_cat2 age_cat3 inc1 inc2 inc3 imm pp proportion denom
21
22 generate percentage = 100*proportion
23 drop proportion
24 format %9.2f percentage
25
26 generate age_cat = .
27 replace age_cat = 1 if age_cat1==1
28 replace age_cat = 2 if age_cat2==1
29 replace age_cat = 3 if age_cat3==1
30
31 generate inc_cat = .
32 replace inc_cat = 1 if inc1==1
33 replace inc_cat = 2 if inc2==1
34 replace inc_cat = 3 if inc3==1
35
36 * Results for the table
37 tabulate pp [fweight = denom]
38 table pp [fweight = denom], contents(mean percentage )
39 tabulate age_cat pp [fweight = denom], column nofreq
40 tabulate inc_cat pp [fweight = denom], column nofreq
41 tabulate imm pp [fweight = denom], column nofreq
42
43 *****
44 * TABLE 2: MODEL 1
45 *****
46
47 * Load the data
48 use "final_mlMENTAL.dta", clear
49
50 * IGLS estimation, for MCMC initial values
51 runmlwin prop cons, ///
52     level2(inter: cons) ///
53     level1(inter:) ///
54     discrete(distribution(binomial) link(logit) denom(denom) mql1) ///
55     nopause
56
57 * MCMC
58 runmlwin prop cons, ///
59     level2(inter: cons, residuals(u, savechains("mlu.dta",replace))) ///
60     level1(inter:) ///

```

```

1
2
3     discrete(distribution(binomial) link(logit) denom(denom)) ///
4     mcmc(burnin(10000) chain(50000) thin(10) savechains("mlb.dta", replace))
5     ///
6     initsprevious ///
7     nopause
8
9     * Level-2 variance
10    scalar mlsigma2u = [RP2]var(cons)
11    scalar list mlsigma2u
12
13    * Level-1 variance
14    scalar mlsigma2e = _pi^2/3
15    scalar list mlsigma2e
16
17    * VPC
18    display "VPC_u = " %9.4f mlsigma2u/(mlsigma2u + mlsigma2e)
19
20    * Compress and save the data
21    compress
22    save "ml.dta", replace
23
24
25    *-----*
26    * PREPARE FIXED-PART PAREMETER CHAINS
27    *-----*
28
29    use "mlb.dta", clear
30    drop deviance RP2_var_cons_ OD_bcons_1
31    rename FP1_* b_*
32    format %9.2f b_*
33    compress
34    save "mlb_prepped.dta", replace
35    isid iteration
36    codebook iteration, compact
37
38
39    *-----*
40    * PREPARE RANDOM EFFECTS CHAINS
41    *-----*
42
43    use "mlu.dta", clear
44    drop residual idnum
45    rename value u
46    format %9.2f u
47    sort inter iteration
48    order inter iteration
49    compress
50    save "mlu_prepped.dta", replace
51    isid inter iteration
52    codebook iteration, compact
53
54
55    *-----*
56    * MERGE DATA, FIXED-PART PARAMETER AND RANDOM EFFECT CHAINS TOGETHER
57    *-----*
58
59    use "final_mlMENTAL", clear
60    count
61    cross using "mlb_prepped.dta"
62    count

```



```

1
2
3 merge m:1 inter iteration using "mlu_prepped.dta", nogenerate assert(match)
4 count
5 compress
6 save "mldata_prepped.dta", replace
7
8
9
10 -----*
11 * ROC
12 -----*
13 use "mldata_prepped.dta", clear
14 count
15 generate p = invlogit(b_cons + u)
16 gcollapse (mean) p, by(inter num denom)
17 count
18 expand denom
19 sort inter
20 bysort inter: generate y = (_n<=numerator)
21 generate prop = denom/_N
22 generate weight = int(1/prop)
23 roctab y p [fw=weight]
24
25
26 -----*
27 * TABLE 3
28 -----*
29 use "mldata_prepped.dta", clear
30 keep iteration inter age_cat1 age_cat2 age_cat3 incl1 incl2 incl3 imm pp denom
31 b_cons u
32 count
33 generate p = 100*invlogit(b_cons + u)
34 drop b_cons u
35 format %9.1f p
36 drop inter
37 reshape wide denom p, i(iteration age_cat1 age_cat2 age_cat3 incl1 incl2 incl3
38 imm) j(pp)
39 generate denom = denom0 + denom1
40 drop denom0 denom1
41 generate pdiff = p1 - p0
42 gcollapse (mean) p0 p1 pdiff (p2.5) pdifflo=pdiff (p97.5) pdiffhi=pdiff,
43 by(age_cat1 age_cat2 age_cat3 incl1 incl2 incl3 imm denom)
44 format %9.1f pdiff pdifflo pdiffhi
45 order p1 p0 pdiff pdifflo pdiffhi, last
46 gsort -age_cat1 -age_cat2 -age_cat3 -incl1 -incl2 -incl3 imm
47
48
49 *****
50 * TABLE 2: MODEL 2:
51 *****
52
53 * Load the data
54 use "final_mlMENTAL.dta", clear
55
56 * IGLS estimation, for MCMC initial values
57 runmlwin prop cons age_cat2 age_cat3 incl1 incl2 imm pp, ///
58 level2(inter: cons) ///
59 levell(inter:) ///
60 discrete(distribution(binomial) link(logit) denom(denom) mql1) ///
nopause

```

```

1
2
3
4 * MCMC
5 runmlwin prop cons age_cat2 age_cat3 incl inc2 imm pp, ///
6   level2(inter: cons, residuals(u,savechains("m2u.dta",replace))) ///
7   level1(inter:) ///
8   discrete(distribution(binomial) link(logit) denom(denom)) ///
9   mcmc(burnin(10000) chain(50000) thin(10) savechains("m2b.dta", replace))
10  ///
11  initsprevious ///
12  nopause
13
14 * Odds ratios
15 runmlwin, or
16
17 * Level-2 variance
18 scalar m2sigma2u = [RP2]var(cons)
19 scalar list m2sigma2u
20
21 * Level-1 variance
22 scalar m2sigma2e = _pi^2/3
23 scalar list m2sigma2e
24
25 * VPC
26 display "VPC_u = " %9.4f m2sigma2u/(m2sigma2u + m2sigma2e)
27
28 * Compress and save the data
29 compress
30 save "m2.dta", replace
31
32 * PCV
33 display "PCV = " %9.4f (m2sigma2u - m1sigma2u)/m1sigma2u
34
35 *-----*
36 * PREPARE FIXED-PART PAREMETER CHAINS
37 *-----*
38 use "m2b.dta", clear
39 drop deviance RP2_var_cons_ OD_bcons_1
40 rename FP1_* b_*
41 format %9.2f b_*
42 compress
43 save "m2b_prepped.dta", replace
44 isid iteration
45 codebook iteration, compact
46
47
48 *-----*
49 * PREPARE inter RANDOM EFFECTS CHAINS
50 *-----*
51 use "m2u.dta", clear
52 drop residual idnum
53 rename value u
54 format %9.2f u
55 sort inter iteration
56 order inter iteration
57 compress
58 save "m2u_prepped.dta", replace
59 isid inter iteration
60 codebook iteration, compact

```

```

1
2
3
4
5
6 *-----*
7 * MERGE DATA, FIXED-PART PARAMETER AND RANDOM EFFECT CHAINS TOGETHER
8 *-----*
9 use "final_mlMENTAL", clear
10 count
11 cross using "m2b_prepped.dta"
12 count
13 merge m:1 inter iteration using "m2u_prepped.dta"
14 count
15 save "m2data_prepped.dta", replace
16
17
18 *-----*
19 * ROC
20 *-----*
21 use "m2data_prepped.dta", clear
22 count
23 generate p = invlogit(b_cons + b_age_cat2*age_cat2 + b_age_cat3*age_cat3 +
24 b_incl*incl + b_inc2*inc2 + b_imm*imm + b_pp*pp)
25 gcollapse (mean) p, by(inter num denom)
26 count
27 expand denom
28 sort inter
29 bysort inter: generate y = (_n<=numerator)
30 generate prop = denom/_N
31 generate weight = int(1/prop)
32 roctab y p [fw=weight]
33
34
35 *-----*
36 * TABLE 3
37 *-----*
38 use "m1data_prepped.dta", clear
39 keep iteration inter age_cat1 age_cat2 age_cat3 incl inc2 inc3 imm pp denom
40 b_cons u
41 count
42 generate p = 100*invlogit(b_cons + u)
43 drop b_cons u
44 format %9.1f p
45 drop inter
46 reshape wide denom p, i(iteration age_cat1 age_cat2 age_cat3 incl inc2 inc3
47 imm) j(pp)
48 generate denom = denom0 + denom1
49 drop denom0 denom1
50 generate pdiff = p1 - p0
51 gcollapse (mean) p0 p1 pdiff (p2.5) pdifflo=pdiff (p97.5) pdiffhi=pdiff,
52 by(age_cat1 age_cat2 age_cat3 incl inc2 inc3 imm denom)
53 format %9.1f pdiff pdifflo pdiffhi
54 order p1 p0 pdiff pdifflo pdiffhi, last
55 gsort -age_cat1 -age_cat2 -age_cat3 -incl -inc2 -inc3 imm
56
57
58 *****
59 exit
60

```

```

1
2
3 *****
4 * Hormonal Contraception and Antidepressant Use in Sweden: An
5 Intersectional Multilevel Analysis of Individual Heterogeneity and
6 Discriminatory Accuracy (MAIHDA)
7 *****
8 clear *
9 global MLwiN_path "C:\Program Files\MLwiN v3.05\mlwin.exe"
10 set cformat %9.2f
11
12
13
14 *****
15 * TABLE 1
16 *****
17
18 * Load the data
19 use "final_mlNoMENTAL.dta", clear
20 keep age_cat1 age_cat2 age_cat3 inc1 inc2 inc3 imm pp proportion denom
21 order age_cat1 age_cat2 age_cat3 inc1 inc2 inc3 imm pp proportion denom
22
23 generate percentage = 100*proportion
24 drop proportion
25 format %9.2f percentage
26
27 generate age_cat = .
28 replace age_cat = 1 if age_cat1==1
29 replace age_cat = 2 if age_cat2==1
30 replace age_cat = 3 if age_cat3==1
31
32 generate inc_cat = .
33 replace inc_cat = 1 if inc1==1
34 replace inc_cat = 2 if inc2==1
35 replace inc_cat = 3 if inc3==1
36
37 * Results for the table
38 tabulate pp [fweight = denom]
39 table pp [fweight = denom], contents(mean percentage )
40 tabulate age_cat pp [fweight = denom], column nofreq
41 tabulate inc_cat pp [fweight = denom], column nofreq
42 tabulate imm pp [fweight = denom], column nofreq
43
44
45 *****
46 * TABLE 2: MODEL 1
47 *****
48
49 * Load the data
50 use "final_mlNoMENTAL.dta", clear
51
52 * IGLS estimation, for MCMC initial values
53 runmlwin prop cons, ///
54   level2(inter: cons) ///
55   level1(inter:) ///
56   discrete(distribution(binomial) link(logit) denom(denom) mql1) ///
57   nopause
58
59 * MCMC
60 runmlwin prop cons, ///
61   level2(inter: cons, residuals(u, savechains("mlu.dta",replace))) ///

```

```

1
2
3     levell(inter:) ///
4     discrete(distribution(binomial) link(logit) denom(denom)) ///
5     mcmc(burnin(10000) chain(50000) thin(10) savechains("mlb.dta", replace))
6     ///
7     initsprevious ///
8     nopause
9
10    * Level-2 variance
11    scalar mlsigma2u = [RP2]var(cons)
12    scalar list mlsigma2u
13
14    * Level-1 variance
15    scalar mlsigma2e = _pi^2/3
16    scalar list mlsigma2e
17
18    * VPC
19    display "VPC_u = " %9.4f mlsigma2u/(mlsigma2u + mlsigma2e)
20
21    * Compress and save the data
22    compress
23    save "ml.dta", replace
24
25
26    *-----*
27    * PREPARE FIXED-PART PAREMETER CHAINS
28    *-----*
29
30    use "mlb.dta", clear
31    drop deviance RP2_var_cons_ OD_bcons_1
32    rename FP1_* b_*
33    format %9.2f b_*
34    compress
35    save "mlb_prepped.dta", replace
36    isid iteration
37    codebook iteration, compact
38
39
40    *-----*
41    * PREPARE RANDOM EFFECTS CHAINS
42    *-----*
43
44    use "mlu.dta", clear
45    drop residual idnum
46    rename value u
47    format %9.2f u
48    sort inter iteration
49    order inter iteration
50    compress
51    save "mlu_prepped.dta", replace
52    isid inter iteration
53    codebook iteration, compact
54
55    *-----*
56    * MERGE DATA, FIXED-PART PARAMETER AND RANDOM EFFECT CHAINS TOGETHER
57    *-----*
58
59    use "final_mlnOMENTAL", clear
60    count
61    cross using "mlb_prepped.dta"

```

```

1
2
3     count
4     merge m:1 inter iteration using "mlu_prepped.dta", nogenerate assert(match)
5     count
6     compress
7     save "mldata_prepped.dta", replace
8
9
10
11     *-----*
12     * ROC
13     *-----*
14     use "mldata_prepped.dta", clear
15     count
16     generate p = invlogit(b_cons + u)
17     gcollapse (mean) p, by(inter num denom)
18     count
19     expand denom
20     sort inter
21     bysort inter: generate y = (_n<=numerator)
22     generate prop = denom/_N
23     generate weight = int(1/prop)
24     roctab y p [fw=weight]
25
26
27     *-----*
28     * TABLE 3
29     *-----*
30     use "mldata_prepped.dta", clear
31     keep iteration inter age_cat1 age_cat2 age_cat3 incl1 incl2 incl3 imm pp denom
32     b_cons u
33     count
34     generate p = 100*invlogit(b_cons + u)
35     drop b_cons u
36     format %9.1f p
37     drop inter
38     reshape wide denom p, i(iteration age_cat1 age_cat2 age_cat3 incl1 incl2 incl3
39     imm) j(pp)
40     generate denom = denom0 + denom1
41     drop denom0 denom1
42     generate pdiff = p1 - p0
43     gcollapse (mean) p0 p1 pdiff (p2.5) pdifflo=pdiff (p97.5) pdiffhi=pdiff,
44     by(age_cat1 age_cat2 age_cat3 incl1 incl2 incl3 imm denom)
45     format %9.1f pdiff pdifflo pdiffhi
46     order p1 p0 pdiff pdifflo pdiffhi, last
47     gsort -age_cat1 -age_cat2 -age_cat3 -incl1 -incl2 -incl3 imm
48
49
50     *****
51     * TABLE 2: MODEL 2:
52     *****
53
54     * Load the data
55     use "final_mlNoMENTAL.dta", clear
56
57     * IGLS estimation, for MCMC initial values
58     runmlwin prop cons age_cat2 age_cat3 incl1 incl2 imm pp, ///
59     level2(inter: cons) ///
60     levell(inter:) ///
61     discrete(distribution(binomial) link(logit) denom(denom) mql1) ///

```

```

1
2
3     nopause
4
5 * MCMC
6 runmlwin prop cons age_cat2 age_cat3 incl inc2 imm pp, ///
7     level2(inter: cons, residuals(u,savechains("m2u.dta",replace))) ///
8     levell(inter:) ///
9     discrete(distribution(binomial) link(logit) denom(denom)) ///
10    mcmc(burnin(10000) chain(50000) thin(10) savechains("m2b.dta", replace))
11    ///
12    initsprevious ///
13    nopause
14
15 * Odds ratios
16 runmlwin, or
17
18 * Level-2 variance
19 scalar m2sigma2u = [RP2]var(cons)
20 scalar list m2sigma2u
21
22 * Level-1 variance
23 scalar m2sigma2e = _pi^2/3
24 scalar list m2sigma2e
25
26 * VPC
27 display "VPC_u = " %9.4f m2sigma2u/(m2sigma2u + m2sigma2e)
28
29 * Compress and save the data
30 compress
31 save "m2.dta", replace
32
33 * PCV
34 display "PCV = " %9.4f (m2sigma2u - m1sigma2u)/m1sigma2u
35
36 *-----*
37 * PREPARE FIXED-PART PAREMETER CHAINS
38 *-----*
39 use "m2b.dta", clear
40 drop deviance RP2_var_cons_ OD_bcons_1
41 rename FP1_* b_*
42 format %9.2f b_*
43 compress
44 save "m2b_prepped.dta", replace
45 isid iteration
46 codebook iteration, compact
47
48
49 *-----*
50 * PREPARE inter RANDOM EFFECTS CHAINS
51 *-----*
52 use "m2u.dta", clear
53 drop residual idnum
54 rename value u
55 format %9.2f u
56 sort inter iteration
57 order inter iteration
58 compress
59 save "m2u_prepped.dta", replace
60 isid inter iteration

```

```

1
2
3 codebook iteration, compact
4
5
6
7 *-----*
8 * MERGE DATA, FIXED-PART PARAMETER AND RANDOM EFFECT CHAINS TOGETHER
9 *-----*
10 use "final_mlNoMENTAL", clear
11 count
12 cross using "m2b_prepped.dta"
13 count
14 merge m:1 inter iteration using "m2u_prepped.dta"
15 count
16 save "m2data_prepped.dta", replace
17
18
19 *-----*
20 * ROC
21 *-----*
22 use "m2data_prepped.dta", clear
23 count
24 generate p = invlogit(b_cons + b_age_cat2*age_cat2 + b_age_cat3*age_cat3 +
25 b_incl*incl + b_inc2*inc2 + b_imm*imm + b_pp*pp)
26 gcollapse (mean) p, by(inter num denom)
27 count
28 expand denom
29 sort inter
30 bysort inter: generate y = (_n<=numerator)
31 generate prop = denom/_N
32 generate weight = int(1/prop)
33 roctab y p [fw=weight]
34
35
36 *-----*
37 * TABLE 3
38 *-----*
39 use "m1data_prepped.dta", clear
40 keep iteration inter age_cat1 age_cat2 age_cat3 incl inc2 inc3 imm pp denom
41 b_cons u
42 count
43 generate p = 100*invlogit(b_cons + u)
44 drop b_cons u
45 format %9.1f p
46 drop inter
47 reshape wide denom p, i(iteration age_cat1 age_cat2 age_cat3 incl inc2 inc3
48 imm) j(pp)
49 generate denom = denom0 + denom1
50 drop denom0 denom1
51 generate pdiff = p1 - p0
52 gcollapse (mean) p0 p1 pdiff (p2.5) pdifflo=pdiff (p97.5) pdiffhi=pdiff,
53 by(age_cat1 age_cat2 age_cat3 incl inc2 inc3 imm denom)
54 format %9.1f pdiff pdifflo pdiffhi
55 order p1 p0 pdiff pdifflo pdiffhi, last
56 gsort -age_cat1 -age_cat2 -age_cat3 -incl -inc2 -inc3 imm
57
58
59 *****
60 exit

```



1  
2  
3  
4  
5  
6  
7  
8  
9  
10  
11  
12  
13  
14  
15  
16  
17  
18  
19  
20  
21  
22  
23  
24  
25  
26  
27  
28  
29  
30  
31  
32  
33  
34  
35  
36  
37  
38  
39  
40  
41  
42  
43  
44  
45  
46  
47  
48  
49  
50  
51  
52  
53  
54  
55  
56  
57  
58  
59  
60

For peer review only

1  
2 pp,imm,inter,age\_cat1,age\_cat2,age\_cat3,inc1,inc2,inc3,proportion,numerator,denom,cons  
3 0,0,12-17 Low income 0 0,1,0,0,1,0,0,.013224002,279,21098,1  
4 1,0,12-17 Low income 0 1,1,0,0,1,0,0,.037408244,265,7084,1  
5 0,1,12-17 Low income 1 0,1,0,0,1,0,0,.0040497542,28,6914,1  
6 1,1,12-17 Low income 1 1,1,0,0,1,0,0,.0096021947,7,729,1  
7  
8 0,0,12-17 Middle income 0 0,1,0,0,0,1,0,.010099272,587,58123,1  
9 1,0,12-17 Middle income 0 1,1,0,0,0,1,0,.030316716,537,17713,1  
10 0,1,12-17 Middle income 1 0,1,0,0,0,1,0,.0056107035,52,9268,1  
11 1,1,12-17 Middle income 1 1,1,0,0,0,1,0,.017814728,15,842,1  
12  
13 0,0,12-17 High income 0 0,1,0,0,0,0,1,.008893352,859,96589,1  
14 1,0,12-17 High income 0 1,1,0,0,0,0,1,.01951286,572,29314,1  
15 0,1,12-17 High income 1 0,1,0,0,0,0,1,.0076045627,30,3945,1  
16 1,1,12-17 High income 1 1,1,0,0,0,0,1,.025718609,17,661,1  
17  
18 0,0,18-23 Low income 0 0,0,1,0,1,0,0,.029676914,530,17859,1  
19 1,0,18-23 Low income 0 1,0,1,0,1,0,0,.034916617,938,26864,1  
20 0,1,18-23 Low income 1 0,0,1,0,1,0,0,.011607248,98,8443,1  
21 1,1,18-23 Low income 1 1,0,1,0,1,0,0,.022702307,62,2731,1  
22  
23 0,0,18-23 Middle income 0 0,0,1,0,0,1,0,.027664155,771,27870,1  
24 1,0,18-23 Middle income 0 1,0,1,0,0,1,0,.0282459,1247,44148,1  
25 0,1,18-23 Middle income 1 0,0,1,0,0,1,0,.011609907,75,6460,1  
26 1,1,18-23 Middle income 1 1,0,1,0,0,1,0,.023316063,54,2316,1  
27  
28 0,0,18-23 High income 0 0,0,1,0,0,0,1,.023347162,1058,45316,1  
29 1,0,18-23 High income 0 1,0,1,0,0,0,1,.022887168,2082,90968,1  
30 0,1,18-23 High income 1 0,0,1,0,0,0,1,.017995911,44,2445,1  
31 1,1,18-23 High income 1 1,0,1,0,0,0,1,.019577537,38,1941,1  
32  
33 0,0,24-30 Low income 0 0,0,0,1,1,0,0,.032189574,2168,67351,1  
34 1,0,24-30 Low income 0 1,0,0,1,1,0,0,.031126546,1954,62776,1  
35 0,1,24-30 Low income 1 0,0,0,1,1,0,0,.013751426,446,32433,1  
36 1,1,24-30 Low income 1 1,0,0,1,1,0,0,.026964672,187,6935,1  
37  
38 0,0,24-30 Middle income 0 0,0,0,1,0,1,0,.030455342,818,26859,1  
39 1,0,24-30 Middle income 0 1,0,0,1,0,1,0,.03591495,652,18154,1  
40 0,1,24-30 Middle income 1 0,0,0,1,0,1,0,.023714487,202,8518,1  
41 1,1,24-30 Middle income 1 1,0,0,1,0,1,0,.027789129,68,2447,1  
42  
43 0,0,24-30 High income 0 0,0,0,1,0,0,1,.025993951,593,22813,1  
44 1,0,24-30 High income 0 1,0,0,1,0,0,1,.024208747,501,20695,1  
45 0,1,24-30 High income 1 0,0,0,1,0,0,1,.023088569,61,2642,1  
46 1,1,24-30 High income 1 1,0,0,1,0,0,1,.019407559,19,979,1  
47  
48  
49  
50  
51  
52  
53  
54  
55  
56  
57  
58  
59  
60

1  
2 pp,imm,inter,age\_cat1,age\_cat2,age\_cat3,inc1,inc2,inc3,proportion,numerator,denom,cons  
3 0,0,12-17 Low income 0 0,1,0,0,1,0,0,.22574355,463,2051,1  
4 1,0,12-17 Low income 0 1,1,0,0,1,0,0,.3049593,412,1351,1  
5 0,1,12-17 Low income 1 0,1,0,0,1,0,0,.12383901,40,323,1  
6 1,1,12-17 Low income 1 1,1,0,0,1,0,0,.1891892,21,111,1  
7  
8 0,0,12-17 Middle income 0 0,1,0,0,0,1,0,.23362993,1024,4383,1  
9 1,0,12-17 Middle income 0 1,1,0,0,0,1,0,.31201944,771,2471,1  
10 0,1,12-17 Middle income 1 0,1,0,0,0,1,0,.13422818,60,447,1  
11 1,1,12-17 Middle income 1 1,1,0,0,0,1,0,.18032786,22,122,1  
12 0,0,12-17 High income 0 0,1,0,0,0,0,1,.28093326,1469,5229,1  
13 1,0,12-17 High income 0 1,1,0,0,0,0,1,.34217408,916,2677,1  
14 0,1,12-17 High income 1 0,1,0,0,0,0,1,.18867925,50,265,1  
15 1,1,12-17 High income 1 1,1,0,0,0,0,1,.3018868,32,106,1  
16 0,0,18-23 Low income 0 0,0,1,0,1,0,0,.37809917,2013,5324,1  
17 1,0,18-23 Low income 0 1,0,1,0,1,0,0,.39212543,2201,5613,1  
18 0,1,18-23 Low income 1 0,0,1,0,1,0,0,.19350649,149,770,1  
19 1,1,18-23 Low income 1 1,0,1,0,1,0,0,.28291318,101,357,1  
20 0,0,18-23 Middle income 0 0,0,1,0,0,1,0,.36302635,2164,5961,1  
21 1,0,18-23 Middle income 0 1,0,1,0,0,1,0,.37776819,2627,6954,1  
22 0,1,18-23 Middle income 1 0,0,1,0,0,1,0,.19285715,108,560,1  
23 1,1,18-23 Middle income 1 1,0,1,0,0,1,0,.27112675,77,284,1  
24 0,0,18-23 High income 0 0,0,1,0,0,0,1,.39782199,2959,7438,1  
25 1,0,18-23 High income 0 1,0,1,0,0,0,1,.38269973,3765,9838,1  
26 0,1,18-23 High income 1 0,0,1,0,0,0,1,.25,82,328,1  
27 1,1,18-23 High income 1 1,0,1,0,0,0,1,.27906978,84,301,1  
28 0,0,24-30 Low income 0 0,0,0,1,1,0,0,.49862742,9082,18214,1  
29 1,0,24-30 Low income 0 1,0,0,1,1,0,0,.50085437,5569,11119,1  
30 0,1,24-30 Low income 1 0,0,0,1,1,0,0,.32457545,1013,3121,1  
31 1,1,24-30 Low income 1 1,0,0,1,1,0,0,.37422037,360,962,1  
32 0,0,24-30 Middle income 0 0,0,0,1,0,1,0,.50859779,2869,5641,1  
33 1,0,24-30 Middle income 0 1,0,0,1,0,1,0,.49799198,1488,2988,1  
34 0,1,24-30 Middle income 1 0,0,0,1,0,1,0,.37214136,358,962,1  
35 1,1,24-30 Middle income 1 1,0,0,1,0,1,0,.33590734,87,259,1  
36 0,0,24-30 High income 0 0,0,0,1,0,0,1,.48993289,1971,4023,1  
37 1,0,24-30 High income 0 1,0,0,1,0,0,1,.48666918,1296,2663,1  
38 0,1,24-30 High income 1 0,0,0,1,0,0,1,.37669376,139,369,1  
39 1,1,24-30 High income 1 1,0,0,1,0,0,1,.45238096,57,126,1  
40  
41  
42  
43  
44  
45  
46  
47  
48  
49  
50  
51  
52  
53  
54  
55  
56  
57  
58  
59  
60

## Supplementary material 5

Supplementary table, summary statistics. Numbers are percentages (numbers within brackets).

|                             |        | Hormonal contraception | Mental health issues |
|-----------------------------|--------|------------------------|----------------------|
| <i>Age</i>                  | 12-17  | 23.2 (63 181)          | 7.2 (19 536)         |
|                             | 18-23  | 59.9 (192 315)         | 13.6 (43 729)        |
|                             | 24-30  | 40.3 (130 103)         | 15.6 (50 447)        |
| <i>Income</i>               | Low    | 40.8 (126 632)         | 15.9 (49 316)        |
|                             | Middle | 38.9 (98 698)          | 12.2 (31 032)        |
|                             | High   | 45.6 (160 269)         | 9.5 (33 363)         |
| <i>Immigrant background</i> | No     | 45.1 (363 390)         | 12.9 (103 938)       |
|                             | Yes    | 20.1 (22 209)          | 8.9 (9 773)          |

**Supplementary table.** Percentage of women within each intersectional dimension using hormonal contraceptives and with previous mental health issues.

## Supplementary material 6

| ATC     | Freq.   | Percent |
|---------|---------|---------|
| G02BA03 | 12 535  | 3.25    |
| G02BB   | 96      | 0.02    |
| G0BB01  | 26 022  | 6.75    |
| G02BB01 | 48      | 0.01    |
| G03AA03 | 4 786   | 1.24    |
| G03AA07 | 126 061 | 32.69   |
| G03AA09 | 3 227   | 0.84    |
| G03AA11 | 15 463  | 4.01    |
| G03AA12 | 4 596   | 13.69   |
| G03AA13 | 12 329  | 1.19    |
| G03AA14 | 5 958   | 3.20    |
| G03AB   | 5 958   | 1.55    |
| G03AB03 | 8 014   | 2.08    |
| G03AB04 | 5 341   | 1.39    |
| G03AC01 | 4 249   | 1.10    |
| G03AC02 | 2 483   | 0.64    |
| G03AC06 | 2 710   | 0.70    |
| G03AC08 | 21 284  | 5.52    |
| G03AC09 | 77 595  | 20.12   |

**Supplementary table, frequency table of hormonal contraceptives.** Frequency of all included hormonal contraceptives in the final cohort of 915 954 women.

## Supplementary material 7

**Sensitivity analysis only including women with a recent health care contact (defined as any dispensed prescription or appointment at a hospital in the last 3 years) = 60.46% of the original population**

**Table 1.** Characteristics of the 553 789 women aged 12 - 30 years and residing in Sweden by 1<sup>st</sup> January 2013 by previous mental health issues and use of hormonal contraceptives. Values are percentages (number of women) if not otherwise indicated.

|                      | Previous mental health issues  |                       |                                |                        |
|----------------------|--------------------------------|-----------------------|--------------------------------|------------------------|
|                      | Yes                            |                       | No                             |                        |
|                      | 19.01 (n = 105 283)            |                       | 80.99 (n = 448 506)            |                        |
|                      | Use of Hormonal contraceptives |                       | Use of Hormonal contraceptives |                        |
|                      | Yes                            | No                    | Yes                            | No                     |
|                      | 42.42<br>(n = 44657)           | 57.58<br>(n = 60 626) | 44.41<br>(n = 199 170)         | 55.59<br>(n = 249 336) |
| Antidepressant drugs | 41.17 (19 886)                 | 39.77 (26 013)        | 2.73 (9 215)                   | 1.87 (8 699)           |
| Age                  |                                |                       |                                |                        |
| 12-17 years          | 15.11 (6 747)                  | 20.75 (12 581)        | 15.63 (31 133)                 | 37.24 (92 846)         |
| 18-23 years          | 48.78 (21 784)                 | 31.29 (18 968)        | 48.30 (96 200)                 | 22.75 (56 735)         |
| 24-30 years          | 36.11 (16 126)                 | 47.96 (29 077)        | 36.07 (71 837)                 | 40.01 (99 755)         |
| Income level         |                                |                       |                                |                        |
| Low                  | 39.70 (17 731)                 | 45.01 (27 286)        | 33.06 (65 847)                 | 35.08 (87 456)         |
| Middle               | 27.55 (12 302)                 | 27.85 (16 887)        | 26.00 (51 776)                 | 29.91 (74 575)         |
| High                 | 32.75 (14 624)                 | 27.14 (16 453)        | 40.94 (81 547)                 | 35.01 (87 305)         |
| Immigrant background |                                |                       |                                |                        |
| No                   | 94.50 (42 200)                 | 88.94 (53 919)        | 93.76 (186 745)                | 83.61 (208 465)        |
| Yes                  | 5.50 (2 457)                   | 11.06 (6 707)         | 6.24 (12 425)                  | 16.39 (40 871)         |

**Table 2.** Results from the Multilevel Analysis of Individual Heterogeneity and Discriminatory Accuracy (MAIHDA) distinguishing between measures of association and measures of variance and discriminatory accuracy. The analyses are stratified by the existence of previous mental issues. Values are point estimations with (95% Confidence Intervals)

|                                      | Without metal health issues |                     | With mental health issues |                     |
|--------------------------------------|-----------------------------|---------------------|---------------------------|---------------------|
|                                      | Model 1                     | Model 2             | Model 1                   | Model 2             |
| <b>Measures of association, Odds</b> |                             |                     |                           |                     |
| Ratios                               |                             |                     |                           |                     |
| Age                                  |                             |                     |                           |                     |
| 12-17                                |                             | Reference           |                           | Reference           |
| 18-23                                |                             | 1.73 (1.33-2.22)    |                           | 1.52 (1.33-1.71)    |
| 24-30                                |                             | 1.90 (1.48-2.40)    |                           | 2.58 (2.29-2.91)    |
| Income                               |                             |                     |                           |                     |
| High                                 |                             | Reference           |                           | Reference           |
| Middle                               |                             | 1.16 (0.91-1.48)    |                           | 0.89 (0.79-1.01)    |
| Low                                  |                             | 1.17 (0.92-1.55)    |                           | 0.89 (0.78-1.01)    |
| Immigrant background                 |                             |                     |                           |                     |
| No                                   |                             | Reference           |                           | Reference           |
| Yes                                  |                             | 0.65 (0.53-0.81)    |                           | 0.55 (0.49-0.61)    |
| Hormonal contraceptives              |                             |                     |                           |                     |
| No                                   |                             | Reference           |                           | Reference           |
| Yes                                  |                             | 1.40 (1.12-1.71)    |                           | 1.18 (1.06-1.34)    |
| <b>Measures of variance</b>          |                             |                     |                           |                     |
| Variance*                            | 0.224 (0.130-0.372)         | 0.077 (0.038-0.141) | 0.287 (0.174-0.468)       | 0.017 (0.008-0.033) |
| VPC                                  | 6.38%                       | 2.29%               | 8.02%                     | 0.51%               |
| PCV                                  |                             | 65.67%              |                           | 94.09%              |
| AUC                                  | 0.61 (0.61-0.61)            | 0.61 (0.61-0.61)    | 0.64 (0.64-0.64)          | 0.64 (0.64-0.64)    |

\*Between-strata variance, variance partition coefficient (VPC), proportional change of the variance (PCV), Area under the curve (AUC)

**Table 3.** Absolute risk (AR) of antidepressant use, and AR difference (ARD) between user and non-users of hormonal contraceptives but otherwise sharing the same intersectional stratum. The values are calculated from the multilevel analysis of individual heterogeneity and discriminatory accuracy (MAIHDA)

| Previous mental health issues | Age (years) | Income level | Immigrant background | Number of women | Use of hormonal contraceptive |                   |                       |      |                  |
|-------------------------------|-------------|--------------|----------------------|-----------------|-------------------------------|-------------------|-----------------------|------|------------------|
|                               |             |              |                      |                 | Yes AR                        | No AR             | Yes-No difference ARD |      |                  |
| No                            | 12 – 17     | Low          | No                   | 14060           | 4.4                           | 1.8               | 2.7 (2 - 3.4)         |      |                  |
|                               |             |              | Yes                  | 3123            | 1.5                           | 0.8               | 0.8 (-0.1 - 2)        |      |                  |
|                               |             | Middle       | No                   | 37376           | 3.6                           | 1.3               | 2.2 (1.8 - 2.6)       |      |                  |
|                               |             |              | Yes                  | 4543            | 2.4                           | 1.0               | 1.4 (0.3 - 2.8)       |      |                  |
|                               | High        | No           | 62712                | 2.4             | 1.1                           | 1.3 (1 - 1.5)     |                       |      |                  |
|                               |             | Yes          | 2165                 | 2.8             | 1.2                           | 1.7 (0.4 - 3.3)   |                       |      |                  |
|                               |             | Low          | No                   | 25939           | 4.2                           | 3.4               | 0.8 (0.3 - 1.2)       |      |                  |
|                               |             |              | Yes                  | 5720            | 2.5                           | 2.0               | 0.5 (-0.3 - 1.4)      |      |                  |
|                               | Middle      | No           | 40241                | 3.3             | 3.6                           | -0.3 (-0.6 - 0.1) |                       |      |                  |
|                               |             | Yes          | 4547                 | 2.7             | 1.8                           | 0.9 (0 - 1.9)     |                       |      |                  |
|                               |             | High         | No                   | 74281           | 2.7                           | 2.9               | -0.2 (-0.4 - 0.1)     |      |                  |
|                               |             |              | Yes                  | 2207            | 2.0                           | 2.7               | -0.6 (-1.9 - 0.5)     |      |                  |
|                               | 24 – 30     | Low          | No                   | 83448           | 3.6                           | 3.7               | 0 (-0.3 - 0.2)        |      |                  |
|                               |             |              | Yes                  | 21013           | 2.9                           | 2.1               | 0.8 (0.3 - 1.4)       |      |                  |
|                               |             | Middle       | No                   | 31818           | 4.0                           | 3.5               | 0.5 (0.1 - 0.9)       |      |                  |
|                               |             |              | Yes                  | 7826            | 3.0                           | 2.7               | 0.3 (-0.5 - 1.2)      |      |                  |
|                               |             | High         | No                   | 25335           | 2.9                           | 3.0               | -0.1 (-0.5 - 0.3)     |      |                  |
|                               |             |              | Yes                  | 2152            | 2.5                           | 2.7               | -0.2 (-1.5 - 1.2)     |      |                  |
|                               |             | Yes          | 12 – 17              | Low             | No                            | 3371              | 30.1                  | 22.3 | 7.8 (4.7 - 10.9) |
|                               |             |              |                      |                 | Yes                           | 429               | 20.4                  | 13.4 | 7 (-0.4 - 14.8)  |
| Middle                        | No          |              |                      | 6787            | 31.0                          | 23.1              | 7.9 (5.7 - 10.1)      |      |                  |
|                               | Yes         |              |                      | 565             | 19.5                          | 14.3              | 5.2 (-1.5 - 12.7)     |      |                  |
| High                          | No          |              | 7807                 | 33.8            | 27.7                          | 6.1 (3.9 - 8.2)   |                       |      |                  |
|                               | Yes         |              | 369                  | 29.7            | 19.4                          | 10.3 (1.2 - 19.6) |                       |      |                  |
|                               | Low         |              | No                   | 10205           | 38.8                          | 36.9              | 1.9 (0.1 - 3.8)       |      |                  |
|                               |             |              | Yes                  | 1068            | 28.1                          | 19.0              | 9.1 (3.5 - 14.6)      |      |                  |
| Middle                        | No          |              | 12082                | 36.6            | 35.0                          | 1.6 (-0.1 - 3.3)  |                       |      |                  |
|                               | Yes         |              | 805                  | 27.2            | 19.1                          | 8.1 (2 - 14.3)    |                       |      |                  |
|                               | High        |              | No                   | 15994           | 37.2                          | 38.5              | -1.3 (-2.8 - 0.3)     |      |                  |
|                               |             |              | Yes                  | 598             | 26.3                          | 25.4              | 0.8 (-6.1 - 7.7)      |      |                  |
| 24 – 30                       | Low         |              | No                   | 26185           | 49.2                          | 48.9              | 0.3 (-0.9 - 1.6)      |      |                  |
|                               |             |              | Yes                  | 3759            | 36.0                          | 32.6              | 3.4 (-0.3 - 7)        |      |                  |
|                               | Middle      |              | No                   | 7820            | 49.2                          | 50.4              | -1.3 (-3.6 - 1)       |      |                  |
|                               |             |              | Yes                  | 1130            | 31.4                          | 37.2              | -5.8 (-12.4 - 0.9)    |      |                  |



|    |  |      |     |      |      |      |                 |
|----|--|------|-----|------|------|------|-----------------|
| 1  |  |      |     |      |      |      |                 |
| 2  |  |      |     |      |      |      |                 |
| 3  |  | High | No  | 5868 | 47.8 | 47.8 | 0 (-2.6 - 2.6)  |
| 4  |  |      | Yes | 441  | 41.3 | 35.2 | 6.1 (-3.6 - 16) |
| 5  |  |      |     |      |      |      |                 |
| 6  |  |      |     |      |      |      |                 |
| 7  |  |      |     |      |      |      |                 |
| 8  |  |      |     |      |      |      |                 |
| 9  |  |      |     |      |      |      |                 |
| 10 |  |      |     |      |      |      |                 |
| 11 |  |      |     |      |      |      |                 |
| 12 |  |      |     |      |      |      |                 |
| 13 |  |      |     |      |      |      |                 |
| 14 |  |      |     |      |      |      |                 |
| 15 |  |      |     |      |      |      |                 |
| 16 |  |      |     |      |      |      |                 |
| 17 |  |      |     |      |      |      |                 |
| 18 |  |      |     |      |      |      |                 |
| 19 |  |      |     |      |      |      |                 |
| 20 |  |      |     |      |      |      |                 |
| 21 |  |      |     |      |      |      |                 |
| 22 |  |      |     |      |      |      |                 |
| 23 |  |      |     |      |      |      |                 |
| 24 |  |      |     |      |      |      |                 |
| 25 |  |      |     |      |      |      |                 |
| 26 |  |      |     |      |      |      |                 |
| 27 |  |      |     |      |      |      |                 |
| 28 |  |      |     |      |      |      |                 |
| 29 |  |      |     |      |      |      |                 |
| 30 |  |      |     |      |      |      |                 |
| 31 |  |      |     |      |      |      |                 |
| 32 |  |      |     |      |      |      |                 |
| 33 |  |      |     |      |      |      |                 |
| 34 |  |      |     |      |      |      |                 |
| 35 |  |      |     |      |      |      |                 |
| 36 |  |      |     |      |      |      |                 |
| 37 |  |      |     |      |      |      |                 |
| 38 |  |      |     |      |      |      |                 |
| 39 |  |      |     |      |      |      |                 |
| 40 |  |      |     |      |      |      |                 |
| 41 |  |      |     |      |      |      |                 |
| 42 |  |      |     |      |      |      |                 |
| 43 |  |      |     |      |      |      |                 |
| 44 |  |      |     |      |      |      |                 |
| 45 |  |      |     |      |      |      |                 |
| 46 |  |      |     |      |      |      |                 |
| 47 |  |      |     |      |      |      |                 |
| 48 |  |      |     |      |      |      |                 |
| 49 |  |      |     |      |      |      |                 |
| 50 |  |      |     |      |      |      |                 |
| 51 |  |      |     |      |      |      |                 |
| 52 |  |      |     |      |      |      |                 |
| 53 |  |      |     |      |      |      |                 |
| 54 |  |      |     |      |      |      |                 |
| 55 |  |      |     |      |      |      |                 |
| 56 |  |      |     |      |      |      |                 |
| 57 |  |      |     |      |      |      |                 |
| 58 |  |      |     |      |      |      |                 |
| 59 |  |      |     |      |      |      |                 |
| 60 |  |      |     |      |      |      |                 |

For peer review only

# BMJ Open

## Population Heterogeneity in Associations Between Hormonal Contraception and Antidepressant Use in Sweden: A Prospective Cohort Study Applying Intersectional Multilevel Analysis of Individual Heterogeneity and Discriminatory Accuracy (MAIHDA)

|                                 |                                                                                                                                                                                                                                                                                                                                                                                                                                                                                                                                                                                                                                                                                                                                                                                              |
|---------------------------------|----------------------------------------------------------------------------------------------------------------------------------------------------------------------------------------------------------------------------------------------------------------------------------------------------------------------------------------------------------------------------------------------------------------------------------------------------------------------------------------------------------------------------------------------------------------------------------------------------------------------------------------------------------------------------------------------------------------------------------------------------------------------------------------------|
| Journal:                        | <i>BMJ Open</i>                                                                                                                                                                                                                                                                                                                                                                                                                                                                                                                                                                                                                                                                                                                                                                              |
| Manuscript ID                   | bmjopen-2021-049553.R2                                                                                                                                                                                                                                                                                                                                                                                                                                                                                                                                                                                                                                                                                                                                                                       |
| Article Type:                   | Original research                                                                                                                                                                                                                                                                                                                                                                                                                                                                                                                                                                                                                                                                                                                                                                            |
| Date Submitted by the Author:   | 26-Aug-2021                                                                                                                                                                                                                                                                                                                                                                                                                                                                                                                                                                                                                                                                                                                                                                                  |
| Complete List of Authors:       | Zettermark, Sofia; Lund University, Unit for Social Epidemiology, Department of Clinical Sciences, Malmö<br>Khalaf, Kani; Lund University, Unit for Social Epidemiology, Department of Clinical Sciences, Malmö<br>Perez-Vicente, Raquel; Lund University, Unit for Social Epidemiology, Department of Clinical Sciences, Malmö<br>Leckie, George; University of Bristol, Center for Multilevel Modelling, School of Education; Lund University, Unit for Social Epidemiology, Department of Clinical Sciences<br>Mulinari, Diana; Lund University, Department of Gender Studies, Faculty of Social Sciences<br>Merlo, Juan; Lund University, Unit for Social Epidemiology, Department of Clinical Sciences; Region Skane Health Care, Center for Primary Health Care Research, Region Skåne |
| <b>Primary Subject Heading</b>: | Epidemiology                                                                                                                                                                                                                                                                                                                                                                                                                                                                                                                                                                                                                                                                                                                                                                                 |
| Secondary Subject Heading:      | Public health, Mental health, Reproductive medicine                                                                                                                                                                                                                                                                                                                                                                                                                                                                                                                                                                                                                                                                                                                                          |
| Keywords:                       | MENTAL HEALTH, Sex steroids & HRT < DIABETES & ENDOCRINOLOGY, SOCIAL MEDICINE, EPIDEMIOLOGY, Depression & mood disorders < PSYCHIATRY                                                                                                                                                                                                                                                                                                                                                                                                                                                                                                                                                                                                                                                        |
|                                 |                                                                                                                                                                                                                                                                                                                                                                                                                                                                                                                                                                                                                                                                                                                                                                                              |

SCHOLARONE™  
Manuscripts



I, the Submitting Author has the right to grant and does grant on behalf of all authors of the Work (as defined in the below author licence), an exclusive licence and/or a non-exclusive licence for contributions from authors who are: i) UK Crown employees; ii) where BMJ has agreed a CC-BY licence shall apply, and/or iii) in accordance with the terms applicable for US Federal Government officers or employees acting as part of their official duties; on a worldwide, perpetual, irrevocable, royalty-free basis to BMJ Publishing Group Ltd ("BMJ") its licensees and where the relevant Journal is co-owned by BMJ to the co-owners of the Journal, to publish the Work in this journal and any other BMJ products and to exploit all rights, as set out in our [licence](#).

The Submitting Author accepts and understands that any supply made under these terms is made by BMJ to the Submitting Author unless you are acting as an employee on behalf of your employer or a postgraduate student of an affiliated institution which is paying any applicable article publishing charge ("APC") for Open Access articles. Where the Submitting Author wishes to make the Work available on an Open Access basis (and intends to pay the relevant APC), the terms of reuse of such Open Access shall be governed by a Creative Commons licence – details of these licences and which [Creative Commons](#) licence will apply to this Work are set out in our licence referred to above.

Other than as permitted in any relevant BMJ Author's Self Archiving Policies, I confirm this Work has not been accepted for publication elsewhere, is not being considered for publication elsewhere and does not duplicate material already published. I confirm all authors consent to publication of this Work and authorise the granting of this licence.

1  
2  
3 1 **Population Heterogeneity in Associations Between Hormonal**  
4  
5 2 **Contraception and Antidepressant Use in Sweden: A Prospective Cohort**  
6  
7 3 **Study Applying Intersectional Multilevel Analysis of Individual**  
8  
9 4 **Heterogeneity and Discriminatory Accuracy (MAIHDA)**  
10

11 5 Sofia Zettermark<sup>1\*</sup>, Kani Khalaf<sup>1</sup>, Raquel Perez-Vicente<sup>1</sup>, George Leckie<sup>1,3</sup>, Diana Mulinari<sup>2</sup>,  
12  
13 6 Juan Merlo<sup>1,4</sup>

14  
15 7  
16 8 <sup>1</sup> Unit for Social Epidemiology, Department of Clinical Sciences, Faculty of Medicine, Lund  
17  
18 9 University, Malmö, Sweden

19  
20 10 <sup>2</sup> Department of Gender Studies, Faculty of Social Sciences, Lund University, Lund, Sweden

21  
22 11 <sup>3</sup> Center for Multilevel Modelling, School of Education, University of Bristol, Bristol, United  
23  
24 12 Kingdom

25 13 <sup>4</sup> Center for Primary Health Care Research, Region Skåne, Malmö, Sweden  
26  
27 14

28  
29 15  
30 16 \*Corresponding author:

31  
32 17 Sofia Zettermark

33  
34 18 sofia.zettermark@med.lu.se

35  
36 19 Unit for Social Epidemiology, Department of Clinical Sciences

37  
38 20 Faculty of Medicine, Lund University

39  
40 21 Jan Waldenströms gata 35, CRC

41  
42 22 214 28, Malmö, Sweden  
43  
44 23  
45 24  
46 25  
47 26  
48 27  
49 28  
50 29  
51 30  
52 31  
53 32  
54 33

55  
56  
57  
58  
59  
60  
Word count: 4390

Keywords: Epidemiology, Contraception, Hormonal contraception, Mental health, Multilevel  
analysis

1  
2  
3 34  
4  
5 35  
6  
7 36  
8  
9 37  
10 38  
11  
12 39  
13  
14 40  
15  
16 41  
17  
18 42  
19  
20 43  
21  
22 44  
23  
24 45  
25  
26 46  
27  
28 47  
29  
30 48  
31  
32 49  
33  
34 50  
35  
36 51  
37  
38 52  
39  
40 53  
41  
42 54  
43  
44 55  
45  
46 56  
47  
48 57  
49  
50 58  
51  
52 59  
53  
54 60  
55  
56  
57  
58  
59  
60

## ABSTRACT

**Objectives** From a reproductive justice framework, we aimed to investigate how a possible association between hormonal contraceptive (HC) and anti-depressants use (as a proxy for depression) is distributed across intersectional strata in the population. We aimed to visualize how intersecting power dynamics may operate in combination with HC use to increase or decrease subsequent use of anti-depressants. Our main hypothesis was that the previously observed association between HC and anti-depressants use would vary between strata, being more pronounced in more oppressed intersectional contexts. For this purpose, we applied an intersectional Multilevel Analysis of Individual Heterogeneity and Discriminatory Accuracy (MAIHDA) approach.

**Design** Observational prospective cohort study using record linkage of national Swedish registers.

**Setting** The population of Sweden.

**Participants** All 915 954 women aged 12-30 residing in Sweden 2010, without a recent pregnancy and alive during the individual one-year follow-up.

**Primary outcome measure** Use of any anti-depressant, meaning being dispensed at least one anti-depressant (ATC N06A) during follow-up.

**Results** Previously mentally healthy hormonal contraceptive users had an odds ratio of 1.79 for use of anti-depressants compared to non-users, whereas this number was 1.28 for women with previous mental health issues. The highest anti-depressant use were uniformly found in strata with previous mental health issues, with highest usage in women aged 24-30 with no immigrant background, low income, and HC use (51.4%). The largest difference in anti-depressant use between HC users and non-users was found in teenagers, and in adult women of immigrant background with low income. Of the total individual variance in the latent propensity of using antidepressant 9.01% (healthy) and 8.16% (with previous mental health issues) was found at the intersectional stratum level.

**Conclusions** Our study suggests teenagers and women with immigrant background and low income could be more sensitive to mood effects of HC, a heterogeneity important to consider moving forward.

1  
2  
3 68  
4  
5 69  
6  
7 70  
8  
9 71  
10 72  
11  
12 73  
13  
14 74  
15 75  
16  
17 76  
18  
19 77  
20  
21 78  
22  
23 79  
24 80  
25  
26 81  
27  
28 82  
29  
30 83  
31  
32 84  
33  
34  
35  
36  
37  
38  
39  
40  
41  
42  
43  
44  
45  
46  
47  
48  
49  
50  
51  
52  
53  
54  
55  
56  
57  
58  
59  
60

## STRENGTHS AND LIMITATIONS OF THIS STUDY

- Entire Swedish population of women aged 12-30 included
- Pharmacy dispensing automatically linked to individual personal identification number in Sweden through the Swedish Prescribed Drug Register and thus very reliable
- Intersectional MAHIDA is a fruitful way of epidemiologically investigating heterogeneity within a population while considering individual conditions determined by societal power dimensions such as class, gender and race
- Anti-depressant dispensing is not a perfect proxy for depression
- Registers cannot not measure actual use of any medication

## 85 INTRODUCTION

86 In recent years, attention in the medical community has increasingly been drawn towards  
87 depression and other adverse effects on mood related to use of hormonal contraception  
88 (HC).(1, 2) Discontinuation rates are high, with mood disturbances or depression being one of  
89 the most common complaints.(3-5) Two large epidemiological studies, one in Denmark and  
90 the other performed in Sweden, have recently shown a higher risk of anti-depressants and  
91 psychotropic drugs use in adolescent users of HC.(6, 7) Randomized controlled trials are rare,  
92 but suggest a negative influence of HC on well-being and sexual function,(8, 9) as well as  
93 evidence of HC modulating brain activity with subsequent mood alterations in some  
94 women.(10, 11) Even though oestrogen and progesterone are known to affect mood,(12) the  
95 growing body of evidence in this field is contradictory, with recent reviews concluding that  
96 both protective and negative effects of HC on mood exist and more research is needed.(13-16)  
97 Despite this uncertainty, many scholars agree that certain subgroups of women seem more  
98 vulnerable to psychological side effects of HC than others, particularly teenagers and women  
99 with previous mental health issues.(10, 13, 17-20) A call for further investigation into these  
100 vulnerable subgroups has been made.(14)

101 A fruitful way of epidemiologically investigating heterogeneity within a  
102 population while considering individual conditions determined by societal power dimensions  
103 such as class, gender and race has been developed through intersectional theory in recent  
104 years.(21-26) Intersectionality theory was first articulated by Black feminist scholars as a way  
105 of understanding how an individual inhabits and is formed by more than one social relation  
106 such as gender, “race” or class, and how these classification systems interconnect to create  
107 specific contexts of oppression or privilege.(27, 28) These categorizations should not be seen  
108 as individual “risky” identities, but as the social, political and economic contextual conditions  
109 that outline our lives through structural inequalities.(29) Reproductive justice is a theoretical  
110 framework that builds upon intersectionality and centres diverse groups of unprivileged  
111 women’s reproductive experiences to recognize that societal context and differing resources  
112 available shape reproductive health.(30) Applying a reproductive justice framework, it  
113 becomes clear that we need to take notice of disparate sociocultural contexts and interlocking  
114 power dimensions to understand different patterns of usage as well as possible diverse  
115 responses to HC.(31, 32)

116 To operationalize an intersectional mapping of heterogeneity in use of anti-  
117 depressants in relation to HC on a population level, we used a multilevel analysis of  
118 individual heterogeneity and discriminatory accuracy (MAIHDA).(21-23, 33, 34) We created

1  
2  
3 119 intersectional strata based on previous literature showing that age, socioeconomic position,  
4  
5 120 and previous mental illness are relevant intersecting dimensions in understanding the relation  
6  
7 121 between HC and depression.(17, 20, 35, 36)

8 122 We conceptualise the intersectional strata as social contexts rather than static  
9  
10 123 individual traits, thereby visualising how intersecting power dynamics can act in combination  
11  
12 124 with HC to predispose for depressive mood. Our main hypothesis was that the previously  
13  
14 125 observed association between HC and use of anti-depressants would vary between strata and  
15  
16 126 that this association would be more pronounced in more oppressed intersectional contexts.  
17  
18 127 We investigate this hypothesis on the whole population of women susceptible to HC use in  
19  
20 128 Sweden.

21 129

## 22 130 **METHOD**

### 23 131 **Databases and study population**

24 132 After allowance from the Swedish Ethical Authority and the data safety committees from  
25  
26 133 Statistics Sweden and the Swedish National Board of Health and Welfare, we obtained a  
27  
28 134 database created by record linkage of several nationwide registers administered by Statistics  
29  
30 135 Sweden (the Swedish Population Register and the Longitudinal Integration Database for  
31  
32 136 Health Insurance and Labour Market Studies, LISA) and the Swedish National Board of  
33  
34 137 Health and Welfare (National Patient Register, the Swedish Prescribed Drug Register (SPDR)  
35  
36 138 and the Cause of Death Register). The Swedish authorities linked the registries using a unique  
37  
38 139 personal identification number, but the database was anonymized before delivering it to us.  
39  
40 140 We defined an initial cohort containing all 1,064,171 women aged 12 - 30 years residing in  
41  
42 141 Sweden 1st January 2010 and obtained individual level data on medication use from SPDR,  
43  
44 142 which contain all dispensed drug prescriptions at Swedish pharmacies since 2006.

45 143 Every woman was assigned an individual baseline date, defined by the first  
46  
47 144 dispensed prescription of an HC drug between 1 January 2010 and 31 December 2014 after  
48  
49 145 12 years of age, and was then followed for one year after her individual baseline date. A  
50  
51 146 woman obtaining her first prescription 1 of September 2013 was therefore followed to the 1  
52  
53 147 of September 2014. For non-users of HC the baseline date could not be based on a HC-  
54  
55 148 prescription and was therefore assigned, to 1st of July 2012 for all adults, but later for some of  
56  
57 149 the younger girls turning 12 during our period of investigation. This means all non-users had  
58  
59 150 been true non-users for at least 1.5 years before their follow-up started (1 January 2010 to 1  
60  
151 July 2012) but also continued to be non-users all the way to 31 December 2014. From the  
152  
152 individual baseline date, the women were followed for one year to find out if a prescription of



1  
2  
3 153 an antidepressant was dispensed. Data was also collected on psychiatric disorders and  
4  
5 154 psychotropic drug use in the past three years (see Assessment of variables). After excluding  
6  
7 155 women with incomplete follow-up time due to death, emigration, missing information on  
8  
9 156 country of birth, and pregnancies one year before and after the baseline as well as, the final  
10  
11 157 database consisted of 915 952 women. This database was divided into two cohorts according  
12  
13 158 to the presence or absence of previous mental health issues, see Figure 1.  
14

159

### 160 **Assessment of variables**

161 Users of HC were defined as any women who, according the SPDR, filled a prescription of  
162  
163 HC (Anatomical Therapeutical Chemical (ATC) classification system codes G02B, G03AA-  
164  
165 C) between 1 January 2010 and 31 December 2014, while non-users did not have a  
166  
167 prescription filled during the same period. Emergency contraception (G03AD) that are mainly  
168  
169 bought over the counter in Sweden was excluded. The majority of HC prescriptions are  
170  
171 acquired via midwives in Sweden (86.0% in our original cohort), whom can only prescribe  
172  
173 HC for contraceptive purposes. Physicians, most often gynecologists, can also can prescribe  
174  
175 HC for other purposes such as in response to bleeding disturbances or endometriosis. Since  
176  
177 these indications could confound our results, we excluded women with physician-issued  
178  
179 prescriptions, see Figure 1. HC prescriptions can be dispensed by pharmacies annually or  
180  
181 every three months.

182  
183  
184  
185  
186  
187  
188  
189  
190  
191  
192  
193  
194  
195  
196  
197  
198  
199  
200  
201  
202  
203  
204  
205  
206  
207  
208  
209  
210  
211  
212  
213  
214  
215  
216  
217  
218  
219  
220  
221  
222  
223  
224  
225  
226  
227  
228  
229  
230  
231  
232  
233  
234  
235  
236  
237  
238  
239  
240  
241  
242  
243  
244  
245  
246  
247  
248  
249  
250  
251  
252  
253  
254  
255  
256  
257  
258  
259  
260  
261  
262  
263  
264  
265  
266  
267  
268  
269  
270  
271  
272  
273  
274  
275  
276  
277  
278  
279  
280  
281  
282  
283  
284  
285  
286  
287  
288  
289  
290  
291  
292  
293  
294  
295  
296  
297  
298  
299  
300  
301  
302  
303  
304  
305  
306  
307  
308  
309  
310  
311  
312  
313  
314  
315  
316  
317  
318  
319  
320  
321  
322  
323  
324  
325  
326  
327  
328  
329  
330  
331  
332  
333  
334  
335  
336  
337  
338  
339  
340  
341  
342  
343  
344  
345  
346  
347  
348  
349  
350  
351  
352  
353  
354  
355  
356  
357  
358  
359  
360  
361  
362  
363  
364  
365  
366  
367  
368  
369  
370  
371  
372  
373  
374  
375  
376  
377  
378  
379  
380  
381  
382  
383  
384  
385  
386  
387  
388  
389  
390  
391  
392  
393  
394  
395  
396  
397  
398  
399  
400  
401  
402  
403  
404  
405  
406  
407  
408  
409  
410  
411  
412  
413  
414  
415  
416  
417  
418  
419  
420  
421  
422  
423  
424  
425  
426  
427  
428  
429  
430  
431  
432  
433  
434  
435  
436  
437  
438  
439  
440  
441  
442  
443  
444  
445  
446  
447  
448  
449  
450  
451  
452  
453  
454  
455  
456  
457  
458  
459  
460  
461  
462  
463  
464  
465  
466  
467  
468  
469  
470  
471  
472  
473  
474  
475  
476  
477  
478  
479  
480  
481  
482  
483  
484  
485  
486  
487  
488  
489  
490  
491  
492  
493  
494  
495  
496  
497  
498  
499  
500  
501  
502  
503  
504  
505  
506  
507  
508  
509  
510  
511  
512  
513  
514  
515  
516  
517  
518  
519  
520  
521  
522  
523  
524  
525  
526  
527  
528  
529  
530  
531  
532  
533  
534  
535  
536  
537  
538  
539  
540  
541  
542  
543  
544  
545  
546  
547  
548  
549  
550  
551  
552  
553  
554  
555  
556  
557  
558  
559  
560  
561  
562  
563  
564  
565  
566  
567  
568  
569  
570  
571  
572  
573  
574  
575  
576  
577  
578  
579  
580  
581  
582  
583  
584  
585  
586  
587  
588  
589  
590  
591  
592  
593  
594  
595  
596  
597  
598  
599  
600  
601  
602  
603  
604  
605  
606  
607  
608  
609  
610  
611  
612  
613  
614  
615  
616  
617  
618  
619  
620  
621  
622  
623  
624  
625  
626  
627  
628  
629  
630  
631  
632  
633  
634  
635  
636  
637  
638  
639  
640  
641  
642  
643  
644  
645  
646  
647  
648  
649  
650  
651  
652  
653  
654  
655  
656  
657  
658  
659  
660  
661  
662  
663  
664  
665  
666  
667  
668  
669  
670  
671  
672  
673  
674  
675  
676  
677  
678  
679  
680  
681  
682  
683  
684  
685  
686  
687  
688  
689  
690  
691  
692  
693  
694  
695  
696  
697  
698  
699  
700  
701  
702  
703  
704  
705  
706  
707  
708  
709  
710  
711  
712  
713  
714  
715  
716  
717  
718  
719  
720  
721  
722  
723  
724  
725  
726  
727  
728  
729  
730  
731  
732  
733  
734  
735  
736  
737  
738  
739  
740  
741  
742  
743  
744  
745  
746  
747  
748  
749  
750  
751  
752  
753  
754  
755  
756  
757  
758  
759  
760  
761  
762  
763  
764  
765  
766  
767  
768  
769  
770  
771  
772  
773  
774  
775  
776  
777  
778  
779  
780  
781  
782  
783  
784  
785  
786  
787  
788  
789  
790  
791  
792  
793  
794  
795  
796  
797  
798  
799  
800  
801  
802  
803  
804  
805  
806  
807  
808  
809  
810  
811  
812  
813  
814  
815  
816  
817  
818  
819  
820  
821  
822  
823  
824  
825  
826  
827  
828  
829  
830  
831  
832  
833  
834  
835  
836  
837  
838  
839  
840  
841  
842  
843  
844  
845  
846  
847  
848  
849  
850  
851  
852  
853  
854  
855  
856  
857  
858  
859  
860  
861  
862  
863  
864  
865  
866  
867  
868  
869  
870  
871  
872  
873  
874  
875  
876  
877  
878  
879  
880  
881  
882  
883  
884  
885  
886  
887  
888  
889  
890  
891  
892  
893  
894  
895  
896  
897  
898  
899  
900  
901  
902  
903  
904  
905  
906  
907  
908  
909  
910  
911  
912  
913  
914  
915  
916  
917  
918  
919  
920  
921  
922  
923  
924  
925  
926  
927  
928  
929  
930  
931  
932  
933  
934  
935  
936  
937  
938  
939  
940  
941  
942  
943  
944  
945  
946  
947  
948  
949  
950  
951  
952  
953  
954  
955  
956  
957  
958  
959  
960  
961  
962  
963  
964  
965  
966  
967  
968  
969  
970  
971  
972  
973  
974  
975  
976  
977  
978  
979  
980  
981  
982  
983  
984  
985  
986  
987  
988  
989  
990  
991  
992  
993  
994  
995  
996  
997  
998  
999  
1000

172           Anti-depressant use, the outcome of our study, was defined, according to the  
173 SPDR, as being dispensed at least one prescription of antidepressants (ATC: N06A) during  
174 the individual one-year follow-up.

175           Previous mental health issues were defined as having any psychiatric disorder  
176 diagnosed at a hospital (ICD: F00-F99) or a dispensed prescription of a psychotropic drug  
177 (ATC: N05A, N05B, N06A) in the past three years.

178           Pregnancies one year previous to baseline and during follow-up were identified  
179 according to the 2019 version of the Nordic Diagnosis-Related Group classification  
180 (NordDRG), Major Diagnostic Categories codes M14 for pregnancy, delivery and post-  
181 partum care.(37)

182           We used family level data on income as of 31 December 2010 from Statistics  
183 Sweden's LISA. Individualized disposable family income was calculated by dividing the total  
184 disposable income of the family by the number of family members, taking into account the  
185 different consumption weights of adults and children determined by Statistics Sweden.  
186 Thereafter, we created three categories (i.e., low, medium, and high) of income using tertile

1  
2  
3 187 cut-offs based on the total Swedish population aged 18 - 80 years. We considered the high-  
4  
5 188 income category as the reference in the comparisons.

6 189 We defined immigrant status at the family level as no family member >18 years  
7  
8 190 of age born in Sweden, since understanding of and access to institutions such as health care  
9  
10 191 differ depending on social position such as it is constructed by the power dimensions of  
11  
12 192 race/immigration, as well as the experience of xenophobia. This variable should therefore be  
13  
14 193 considered as an effort to capture a social position affecting possibilities and life trajectories  
15  
16 194 rather than an essentialist view of otherness. We categorized age at the individual baseline into  
17  
18 195 the following groups: 12 to 17, 18 to 23, and 24 to 30 years to capture age specific conditions  
19  
20 196 of adolescents, young adults, and adult women.

21 197

### 22 198 **Intersectional Strata**

23  
24 199 Within each cohort stratified by previous mental health issues, we generated 36 intersectional  
25  
26 200 strata by combining three categories of age, three categories of income, two categories of  
27  
28 201 immigrant background, and two categories of HC use. Mental health issues can be considered  
29  
30 202 as a valid category of intersectional investigation in a society that considers an able body and  
31  
32 203 mind vital, in other words relating to the power dimension of able-bodiedness,(38, 39).  
33  
34 204 Mental health issues were also included in the analysis since they are a strong determinant of  
35  
36 205 antidepressant use that needs to be addressed. We could consider that over and above  
37  
38 206 individual characteristics, mental illness-related stigma may condition inequities in health  
39  
40 207 care.(40) As with gender or income, able-bodiedness concerning mental health can therefore  
41  
42 208 be conceptualized as a contextual dimension when defining intersectional strata.

43 209

### 44 210 **Statistical analysis**

45 211 We performed an intersectional MAIHDA with individual women at the first level of analysis  
46  
47 212 and the 36 intersectional strata at the second level, stratified by previous mental health issues  
48  
49 213 (See Supplementary material 1-4). The use of antidepressants in the population was thus  
50  
51 214 analysed through two successive multilevel logistic regression models distinguishing between  
52  
53 215 measures of association and measures of variance and discriminatory accuracy.

54 216

#### 55 217 *Model 1*

56 218 The first model included only an intercept and a random effect for the intersectional strata  
57  
58 219 with no covariates. In this model 1 we first (i) performed a simple analysis of components of  
59  
60 220 variance and calculated the Variance Partition Coefficient (VPC). That is, the share

1  
2  
3 221 (expressed as a percentage) of the total individual variance in the latent propensity of  
4 222 antidepressant use that is at the intersectional strata level. In this simple model, the VPC  
5 223 correspond with the Intraclass Correlation Coefficient (ICC) which informs on the clustering  
6 224 of antidepressant use within intersectional strata. The VPC values extend from 0 to 100%.  
7 225 Second, (ii) we calculate the stratum-specific absolute usage of anti-depressants and their  
8 226 95% credible intervals (CI) by transformation of the information from the logistic regression  
9 227 to the probability scale. We used this information to map the user heterogeneity across the  
10 228 intersectional strata. Then, (iii) using these stratum-specific predictions, we calculated the  
11 229 Area Under the receiver operator characteristics Curve (AUC). The AUC informs on the  
12 230 accuracy of the intersectional strata information for discriminating those women who used  
13 231 antidepressants from those who did not. The AUC values extend from 0.5 to 1, where 0.5  
14 232 represent absence of accuracy and 1 represents total accuracy. Both the VPC and the AUC in  
15 233 model 1 can be interpreted as measures of discriminatory accuracy,(41) and inform on the  
16 234 magnitude of the general intersectional effects. The higher the VPC and AUC values, the  
17 235 higher the influence of the intersectional context on individual use of antidepressants. Finally,  
18 236 (iv) we calculated the difference in anti-depressant use and 95% CI between similar pairs of  
19 237 strata differing only on the use of HC. This represents the stratum specific association  
20 238 between HC and antidepressant use.  
21  
22  
23  
24  
25  
26  
27  
28  
29  
30  
31  
32  
33  
34  
35

239

#### 240 *Model 2 or fixed main effects model*

36 241 This model includes the fixed, main effects of all the intersectional dimensions (i.e., age,  
37 242 income, immigrant background, and HC use) used to define the intersectional strata. In model  
38 243 2 we quantified, (i) the association between the intersectional dimensions and use of  
39 244 antidepressants as expressed by odds ratio (OR) and 95% CI. We also calculate (ii) the  
40 245 Proportional Change in the Variance (PCV). The PCV measures the overall proportion of  
41 246 strata variance of model 1 explained by the specific intersectional dimensions. Since model 2  
42 247 contains all the variables used to construct the intersectional strata as main effects, it should  
43 248 explain all the strata variance (i.e., PCV= 100%). If this is not the case, the remaining  
44 249 between strata variance would be due to the existence of multiplicative interaction of effects  
45 250 between the intersectional dimensions defining the strata.(22, 42)  
46  
47  
48  
49  
50  
51  
52  
53  
54

55 251 The AUCs of the models 1 and 2 are expected to be the same because model 2  
56 252 only decomposes the stratum-specific predicted probabilities obtained in model 1 into fixed  
57 253 and random effect components and their sum equals the prediction obtained only by random  
58 254 effects in model 1.  
59  
60

255 We ran the models using MLwiN 3.00 by calling it from within Stata 14.1 using  
 256 the *runmlwin* command.(43) The estimations were performed using Markov chain Monte  
 257 Carlo (MCMC) methods. All points estimations and their 95% credible intervals were based  
 258 on the parameter and random effect chains obtained from the MCMC estimation. See  
 259 elsewhere for further information on the statistical MAIHDA analysis including Stata  
 260 commands,(33, 42) and discussion on the theory and methodological approach.(22, 44)

261

## 262 Patient and Public Involvement statement

263 The research was developed with a grassroots perspective in mind, whereby women's  
 264 experiences of use of hormonal contraception inspired and informed the choice of research  
 265 area and research questions. The anonymised data and scope of the study, including around 1  
 266 million women, prohibited direct patient involvement.

267

## 268 RESULTS

### 269 Characteristics of the population

270 The selection of the study population is shown in Figure 1. Out of the 915 952 women 12.4%  
 271 (n = 113 711) had previous mental health issues. Mean age was somewhat older for women  
 272 with previous mental health issues (22.5 years; SD 4.8) than for those without such concerns  
 273 (20.8 years; SD 5.3). Supplementary material 5 shows pooled statistics for usage of previous  
 274 mental health issues and HC use, while Supplementary material 6 displays a frequency table  
 275 over all included HC. Table 1 displays the baseline characteristics of the population by  
 276 previous mental health issues and use of hormonal contraceptives.

**Table 1.** Characteristics of the 915 954 women aged 12 - 30 years by previous mental health issues and use of hormonal contraceptives. Values are percentages (number of women in parenthesis).

|                                 | Previous mental health issues |                     |                       |                      |
|---------------------------------|-------------------------------|---------------------|-----------------------|----------------------|
|                                 | Yes<br>12.4 (113 711)         |                     | No<br>87.6 (802 243)  |                      |
|                                 | Use of HC                     |                     | Use of HC             |                      |
|                                 | Yes<br>42.5 (48 302)          | No<br>57.5 (65 409) | Yes<br>42.0 (337 297) | No<br>58.0 (464 946) |
| Antidepressant during follow-up | 41.2 (19 886)                 | 39.8 (26 013)       | 2.7 (9 215)           | 1.9 (8 699)          |
| Age                             |                               |                     |                       |                      |
| 12-17 years                     | 14.2 (6 838)                  | 19.4 (12 698)       | 16.7 (56 343)         | 42.1 (195 937)       |
| 18-23 years                     | 48.3 (23 347)                 | 31.2 (20 381)       | 50.1 (168 968)        | 23.3 (108 939)       |

|                             |               |               |                |                |
|-----------------------------|---------------|---------------|----------------|----------------|
| 24-30 years                 | 37.5 (18 117) | 49.4 (32 330) | 33.2 (11 986)  | 34.6 (160 616) |
| <b>Income level</b>         |               |               |                |                |
| <i>Low inc.</i>             | 40.4 (19 513) | 45.6 (29 803) | 31.8 (107 119) | 33.1 (154 098) |
| <i>Medium inc.</i>          | 27.1 (13 078) | 27.5 (17 954) | 25.4 (85 620)  | 29.5 (137 098) |
| <i>High inc.</i>            | 32.5 (15 711) | 27.0 (17 652) | 42.9 (144 558) | 37.4 (173 750) |
| <b>Immigrant background</b> |               |               |                |                |
| <i>None</i>                 | 94.6 (45 674) | 89.1 (58 264) | 94.2 (317 716) | 82.6 (383 878) |
| <i>Yes</i>                  | 5.4 (2 628)   | 10.9 (7 145)  | 5.8 (19 581)   | 17.4 (81 068)  |

277

278 The share of HC users was very similar in healthy women and those with previous mental  
 279 health issues, 42.0% and 42.5%, respectively. Anti-depressants were dispensed to 2.7% of HC  
 280 users compared to 1.9% of non-users among healthy women during follow-up. For women  
 281 with previous mental health issues, 41.2% of HC users and 39.8% of non-users dispensed an  
 282 anti-depressant prescription. The income levels were generally higher among women without  
 283 mental health issues, and HC users were somewhat more affluent in both cohorts.

284

### 285 **Results from the MAIHDA**

286 Table 2 shows the results from the MAIHDA distinguishing between measures of association  
 287 and measures of variance and discriminatory accuracy.

Table 2. Results from the Multilevel Analysis of Individual Heterogeneity and Discriminatory Accuracy (MAIHDA) distinguishing between measures of association (Odds Ratios) and measures of variance and

discriminatory accuracy. The analyses are stratified by the existence of previous mental issues. Values are point estimations (with 95% credible intervals) or percentages where indicated.

|                                                          | Without metal health issues |                  | With mental health issues |                  |
|----------------------------------------------------------|-----------------------------|------------------|---------------------------|------------------|
|                                                          | Model 1                     | Model 2          | Model 1                   | Model 2          |
| <b>Measures of association</b>                           |                             |                  |                           |                  |
| <b>Age</b>                                               |                             |                  |                           |                  |
| <i>12-17 years</i>                                       |                             | Reference        |                           | Reference        |
| <i>18-23 years</i>                                       |                             | 1.78 (1.36-2.42) |                           | 1.57 (1.38-1.76) |
| <i>24-30 years</i>                                       |                             | 2.09 (1.65-2.70) |                           | 2.66 (2.36-3.00) |
| <b>Income</b>                                            |                             |                  |                           |                  |
| <i>High inc.</i>                                         |                             | Reference        |                           | Reference        |
| <i>Medium inc.</i>                                       |                             | 1.05 (0.78-1.37) |                           | 0.87 (0.77-0.98) |
| <i>Low inc.</i>                                          |                             | 1.10 (0.81-1.41) |                           | 0.87 (0.77-0.98) |
| <b>Immigrant background</b>                              |                             |                  |                           |                  |
| <i>None</i>                                              |                             | Reference        |                           | Reference        |
| <i>Yes</i>                                               |                             | 0.63 (0.49-0.79) |                           | 0.55 (0.49-0.61) |
| <b>Hormonal contraception</b>                            |                             |                  |                           |                  |
| <i>No</i>                                                |                             | Reference        |                           | Reference        |
| <i>Yes</i>                                               |                             | 1.62 (1.34-2.06) |                           | 1.19 (1.08-1.31) |
| <b>Measures of variance and discriminatory accuracy*</b> |                             |                  |                           |                  |
| Variance                                                 | 0.30 (0.18-0.50)            | 0.10 (0.06-0.18) | 0.29 (0.18-0.49)          | 0.02 (0.01-0.03) |
| VPC                                                      | 8.45%                       | 3.02%            | 8.18%                     | 0.49%            |
| PCV                                                      |                             | 66.29%           |                           | 94.48%           |
| AUC                                                      | 0.62 (0.62-0.62)            | 0.62 (0.62-0.62) | 0.64 (0.64-0.64)          | 0.64 (0.64-0.64) |

\*Between-strata variance, variance partition coefficient (VPC), proportional change of the variance (PCV), Area under the curve (AUC)

288  
 289 Model 1 indicates that 8.45% (without mental health issues) and 8.18% (with previous mental  
 290 health issues) of the total individual variance in the latent propensity of using antidepressant is  
 291 at the intersectional strata level. These VPCs correspond with AUC values of 0.62 and 0.64  
 292 respectively. Both measures suggest the existence of a moderate intersectional effect. The  
 293 PCV was high in both groups, but especially so in the group with previous mental health  
 294 issues, meaning the intersectional dimensions or main effects explain more of the inter-strata  
 295 variance for these women. Model 2 shows that HC was associated with increased usage of  
 296 antidepressants after adjustment for all other intersectional dimensions. This result was seen  
 297 within both cohorts, but more strongly so in women without previous mental health issues

298 (OR 1.62 compared to 1.19). Finally, the VPC in model 2 was very small (3.02% and 0.49%  
 299 respectively) but did not vanish. This finding means that while the intersectional strata effect  
 300 was mainly due the additive effect of variables defining the strata, a small component due to  
 301 interaction of effects could also be detected.

302

### 303 **Heterogeneity concerning antidepressant use in our cohort**

304 Women with previous mental health issues had a much higher usage of antidepressants than  
 305 women without such issues, but the association with HC use nonetheless varied across the  
 306 other intersectional dimensions. Table 3 show the stratum-specific incidence rates for  
 307 antidepressant use and 95% CI obtained in model 1.

308

**Table 3.** Distribution of antidepressant use between different intersectional strata, and difference in usage between user and non-users of hormonal contraceptives but otherwise sharing the same intersectional stratum. The values are calculated from the multilevel analysis of individual heterogeneity and discriminatory accuracy (MAIHDA). Numbers are percentages.

| Previous mental health issues | Age (years) | Income level | Immigrant background | Number of women | Use of hormonal contraceptives (%) |                        |                         |
|-------------------------------|-------------|--------------|----------------------|-----------------|------------------------------------|------------------------|-------------------------|
|                               |             |              |                      |                 | Yes                                | No                     | Yes-No difference       |
| No                            | 12 – 17     | Low          | No                   | 28182           | 3.7                                | 1.3                    | <b>2.4 (1.9 , 2.8)</b>  |
|                               |             |              | Yes                  | 7643            | 1.2                                | 0.5                    | <b>0.7 (0.1 , 1.5)</b>  |
|                               |             | Middle       | No                   | 75836           | 3.0                                | 1.0                    | <b>2.0 (1.8 , 2.3)</b>  |
|                               |             |              | Yes                  | 10110           | 1.8                                | 0.6                    | <b>1.2 (0.5 , 2.1)</b>  |
|                               |             | High         | No                   | 125903          | 2.0                                | 0.9                    | <b>1.1 (0.9 , 1.2)</b>  |
|                               |             |              | Yes                  | 4606            | 2.5                                | 0.8                    | <b>1.6 (0.6 , 2.8)</b>  |
|                               | 18 – 23     | Low          | No                   | 44723           | 3.5                                | 3.0                    | <b>0.5 (0.2 , 0.9)</b>  |
|                               |             |              | Yes                  | 11174           | 2.3                                | 1.2                    | <b>1.1 (0.5 , 1.7)</b>  |
|                               |             | Middle       | No                   | 72018           | 2.8                                | 2.8                    | 0.1 (-0.2 , 0.3)        |
|                               |             |              | Yes                  | 8776            | 2.3                                | 1.2                    | <b>1.1 (0.5 , 1.8)</b>  |
|                               |             | High         | No                   | 136284          | 2.3                                | 2.3                    | 0 (-0.2 , 0.1)          |
|                               |             |              | Yes                  | 4386            | 2.0                                | 1.8                    | <b>0.2 (-0.6 , 0.9)</b> |
| 24 – 30                       | Low         | No           | 130127               | 3.1             | 3.2                                | -0.1 (-0.3 , 0.1)      |                         |
|                               |             | Yes          | 39368                | 2.7             | 1.4                                | <b>1.3 (0.9 , 1.7)</b> |                         |
|                               | Middle      | No           | 45013                | 3.6             | 3.0                                | <b>0.5 (0.2 , 0.9)</b> |                         |
|                               |             | Yes          | 10965                | 2.7             | 2.4                                | 0.4 (-0.3 , 1.1)       |                         |
|                               | High        | No           | 43508                | 2.4             | 2.6                                | -0.2 (-0.5 , 0.1)      |                         |
|                               |             | Yes          | 3621                 | 1.9             | 2.3                                | -0.3 (-1.3 , 0.7)      |                         |
| Yes                           | 12 – 17     | Low          | No                   | 3402            | 30.5                               | 22.7                   | <b>7.8 (4.7 , 10.8)</b> |
|                               |             |              | Yes                  | 434             | 20.8                               | 13.7                   | 7.1 (-0.3 , 15.1)       |
|                               |             | Middle       | No                   | 6854            | 31.2                               | 23.4                   | <b>7.8 (5.6 , 10.1)</b> |

|         |        |     |       |      |      |                          |
|---------|--------|-----|-------|------|------|--------------------------|
|         |        | Yes | 569   | 19.9 | 14.2 | 5.7 (-1.2 , 13.1)        |
|         | High   | No  | 7906  | 34.2 | 28.1 | <b>6.1 (3.9 , 8.3)</b>   |
|         |        | Yes | 371   | 30.4 | 19.8 | <b>10.6 (1.4 , 19.9)</b> |
| 18 – 23 | Low    | No  | 10937 | 39.2 | 37.8 | 1.4 (-0.4 , 3.2)         |
|         |        | Yes | 1127  | 28.5 | 19.7 | <b>8.8 (3.4 , 14.4)</b>  |
|         | Middle | No  | 12915 | 37.8 | 36.3 | 1.5 (-0.2 , 3.1)         |
|         |        | Yes | 844   | 27.4 | 19.7 | <b>7.7 (1.9 , 13.7)</b>  |
|         | High   | No  | 17276 | 38.3 | 39.8 | -1.5 (-3 , 0)            |
|         |        | Yes | 629   | 28.1 | 25.4 | 2.8 (-4 , 9.4)           |
| 24 – 30 | Low    | No  | 29333 | 50.1 | 49.9 | 0.2 (-1 , 1.4)           |
|         |        | Yes | 4083  | 37.3 | 32.4 | <b>4.9 (1.5 , 8.4)</b>   |
|         | Middle | No  | 8629  | 49.7 | 50.8 | -1.1 (-3.4 , 1.1)        |
|         |        | Yes | 1221  | 33.5 | 37.1 | -3.6 (-10 , 2.6)         |
|         | High   | No  | 6686  | 48.5 | 48.9 | -0.4 (-2.9 , 2)          |
|         |        | Yes | 495   | 43.7 | 37.5 | 6.3 (-3.2 , 15.8)        |

309

310

311 The highest use of anti-depressants were observed in non-immigrant women, aged 24-30,  
 312 with previous mental health issues, using HC and with low income (50.1%). The lowest usage  
 313 were found in teenagers without previous mental health issues and no HC use, especially in  
 314 the strata of immigrant girls from low (0.50%) and middle-income (0.60%) households.

315

### 316 **Heterogeneity concerning the association between hormonal contraceptive and** 317 **antidepressant use**

318 Overall, the propensity to use antidepressants was consistently higher in HC users compared  
 319 to non-users in younger women between 12 and 17 years of age, both without previous mental  
 320 health issues (0.7 – 2.4 percentage points), and with a mental health history (5.7 – 7.8  
 321 percentage points) with the magnitude being higher in the latter group. However, the 95%  
 322 credible intervals were broad since the number of individuals was relatively small in these  
 323 latter strata. Table 3 gives detailed information on these associations. In adolescents the  
 324 tendency was that an immigrant background lowered the use of anti-depressants, while the  
 325 opposite was true for adult women, where a positive association between HC use and later  
 326 antidepressant use was mainly found in women with low income and immigrant background,  
 327 again with higher magnitudes in women with previous mental health issues. The association  
 328 between HC and antidepressant use was smaller in adult women native to Sweden no matter  
 329 their income, and completely disappeared in adult women with high income regardless of  
 330 immigrant background.



331

**DISCUSSION**

The main hypothesis of our study was that the previously observed association between HC and antidepressant use, mainly seen in adolescent girls(6-9, 17, 45), would be modified by the intersectional context of the women, being more pronounced in more oppressed intersectional contexts. We confirmed that subsequent use of anti-depressants after an HC prescription compared to non-users of HC within the same intersectional context was heterogeneous across intersectional strata pairs. As hypothesized, the difference in propensity to use anti-depressants was more pronounced in more oppressed intersectional contexts like those composed by immigrant, low-income women with previous mental issues. That is, the use of antidepressants and to some extent the difference in use between HC users and non-users varied mainly depending on previous mental health issues, but the HC-antidepressant association was considerably modified across pair of strata with other characteristics equal but where HC use and non-use differed, in both cohorts. Aside from adolescent girls, low and middle income adult women with immigrant background had a more pronounced difference in propensity for using anti-depressants, while adult women without immigrant background had both the lowest anti-depressant use and a low grade of modification by HC use.

Independently of previous mental health issues, the propensity for using anti-depressants was consistently higher for HC users than for non-users in teenagers aged 12-17, a result aligned with previous studies that has found a heterogeneous response with regard to both age and other factors.(6, 7, 17, 18, 20, 45-47) As discussed in a previous paper, this higher risk for adolescents could be due to a *selective discontinuation bias*,<sup>(7)</sup> a development of the *healthy worker survivor effect*, describing how bias is introduced through a continuous selection where those staying in the workforce are healthier than those who leave.<sup>(48)</sup> Women who experience a negative influence of HC on psychological health might discontinue treatment in early ages, while those without symptoms continued on HC into adulthood, creating this age-dependent *selective discontinuation bias*. This could explain why the observed association between HC and adverse mental health outcomes are stronger in adolescents. Most Swedish women do however continue their HC treatment with the same method.<sup>(49)</sup> A previous study found that new users of HC has a higher risk of obtaining antidepressants within the first six months of HC use than continuous users.<sup>(6)</sup> To address this possible bias we ran two different sensitivity analyses differentiating between women who filed a first prescription of an HC for the first time during the study period (26.2% of HC

1  
2  
3 364 users) and those that had a repeat prescription. In our cohort the association between HC use  
4  
5 365 and subsequent anti-depressant use was very similar in new and continuous users, but slightly  
6  
7 366 higher among new users, as expected (OR 1.52 and 1.45, respectively, with overlapping 95%  
8  
9 367 confidence intervals). We then excluded all women with HC use any time during 5 years  
10  
11 368 before baseline, thus including using only new users of HC during baseline and never-users as  
12  
13 369 reference group (n = 532 543) and reran the analysis. The association between HC use and  
14  
15 370 subsequent antidepressant use became somewhat stronger in women without mental health  
16  
17 371 issues (OR 1.86) and the VPC also increased. The pattern of antidepressant use in the  
18  
19 372 intersectional strata stayed the same, but the confidence intervals increased since the number  
20  
21 373 of women included was smaller, see Supplementary material 7.

22  
23 374 As expected, among adult women the overall propensity for using anti-depressants  
24  
25 375 was higher, as it is known that anti-depressant use increases by age,(50,51) and the difference  
26  
27 376 between HC users and non-users was smaller. Women native to Sweden had a higher  
28  
29 377 propensity for using anti-depressants, but this was moderated by HC exposure to a lower  
30  
31 378 extent than for immigrant women. In adult women native to Sweden, HC use gave no increase  
32  
33 379 of antidepressant use among those with high income. The lower utilization of anti-depressants  
34  
35 380 does not necessarily mean that immigrant women are healthier, since earlier studies have  
36  
37 381 found immigrants utilize healthcare to a lesser extent, even though the need is pronounced,  
38  
39 382 with reasons including discrimination.(52,53) A recent study found that adjustment for  
40  
41 383 health care access eliminated the association between HC initiation and subsequent anti-  
42  
43 384 depressant use in a US population.(54) Although the health care system is different in Sweden  
44  
45 385 and visits to midwives for contraceptive purposes free, we conducted a sensitivity analysis  
46  
47 386 including only women who had accessed health care within the last three years to address this.  
48  
49 387 Using only care-accessors as the reference group did not change our results in any substantive  
50  
51 388 way, see Supplementary material 8 .

### 47 389 **Intersectional considerations**

48  
49 390 The big difference in anti-depressant consumption depending on HC use for lower income  
50  
51 391 immigrant women could be interpreted as the intersectional contexts embodied by these  
52  
53 392 women are more susceptible to the potential detrimental effect of HC on mood. The  
54  
55 393 interrelating negative consequences of low income as a proxy for class or social position,  
56  
57 394 gender and xenophobia may accumulate over the life course and lead to a higher vulnerability  
58  
59 395 to exposures that predispose for antidepressant use later in life,(55-57) whereas this diverse  
60  
396 vulnerability to HC exposure might not be visible in teenagers. Social experiences can vary

1  
2  
3 397 depending on for example social position, which in turn impact psychological development,  
4 398 mood and cognition, thus influencing health.(58, 59) In understanding how HC can impact  
5 399 women's mental health differently, both possible individual biological predispositions and  
6 400 social settings need to be investigated, since the emotional response to HC is influenced by  
7 401 context.(32) In other words, the interlocking power axes that create oppression could  
8 402 predispose women already under structural burdens for adverse mental health reactions when  
9 403 using HC. The fact that adult women native to Sweden were almost unaffected by HC use,  
10 404 could strengthen this suggestion. Without the intersectional strata this disparity would not  
11 405 have been so easily identified and visualized.

12  
13  
14  
15  
16  
17  
18  
19 406 Focusing on women whose lives are affected by several interlocking power  
20 407 dimensions such as low social position and xenophobia is fundamental to achieving  
21 408 reproductive justice.(30) Nonetheless, our intersectional strata should not be considered static  
22 409 categories of inherently "risky identities" but must be interpreted as context specific  
23 410 vulnerabilities of women within certain interlocking positions, constituted in relation to power  
24 411 dynamics created by unequal schemes such as the economic system.(25, 29) It is likely that in  
25 412 other contexts, other groups could be more vulnerable. It is also important to remember that  
26 413 the purpose of HC most commonly is protection against unwanted pregnancy, a situation that  
27 414 if it arises in itself can have negative mental health effects. In identifying the underlying  
28 415 power systems creating these intersectional categories and acknowledging their constant  
29 416 movement and changing dynamics on a societal level, it furthermore becomes possible to  
30 417 address these inequalities through social change.

31  
32  
33  
34  
35  
36  
37  
38  
39  
40 418 In this study, we have combined a classical epidemiological approach of  
41 419 exposure to HC and an intersectional MAHIDA to create a novel understanding of how  
42 420 intersecting power dynamics could create particular vulnerabilities to this specific exposure.  
43 421 Because of our study design, where women are followed for one year after a dispensed  
44 422 prescription of HC, it is more theoretically coherent to view use of HC as an exposure rather  
45 423 than a component of the intersectional strata. However, it is possible to within our approach  
46 424 view HC use as a socio-contextual factor that captures certain living conditions (for example  
47 425 more likely to be sexually active or in a heterosexual relationship), which somewhat changes  
48 426 the interpretation of the results. This epistemological tension is not necessarily a limitation,  
49 427 but could enrich the dialogue in social epidemiology on whether it is possible to separate  
50 428 contextual factors from "pure" exposure.(60-62)

## 51 429 **Limitations**

1  
2  
3 430 The findings from this study must be interpreted in the context of its limitations. The SPDR  
4  
5 431 has highly reliable data on dispensed prescriptions but cannot measure the actual use of  
6  
7 432 dispensed medications. Whether the women was exposed to HC treatment during her entire  
8  
9 433 follow-up is thus not possible to determine with our method, although previous Swedish data  
10  
11 434 suggest continuation rates for any HC after 6 months are almost 90%.(47) Our methodology  
12  
13 435 does furthermore not allow for differentiation between new users and continuous users of HC.  
14  
15 436 Previous studies has shown an increased risk for depression in new users,(6) which could  
16  
17 437 mean we underestimate the associations when also including continuous users. Nevertheless,  
18  
19 438 a sensitivity analysis (see Supplementary material 7) showed that the pattern of antidepressant  
20  
21 439 use and heterogeneity between groups that the MAIHDA shows remain the same when  
22  
23 440 including only new users. Combining MAIHDA with a survival analysis would possibly  
24  
25 441 address this issue better and could be considered in the future. Use of anti-depressants can be  
26  
27 442 considered a proxy for depression, but anti-depressants are also prescribed for other reasons  
28  
29 443 than depression, including generalized anxiety disorder, obsessive-compulsive disorder and  
30  
31 444 panic disorder.(63) Therefore it is not a perfect proxy of depression but may be a more  
32  
33 445 general indication of impaired mental health.(64) However, out of all women with potentially  
34  
35 446 unfavorable mental health effects from HC, only a subset would have symptoms severe  
36  
37 447 enough to get an anti-depressant prescription, leading instead to many missed cases. Since the  
38  
39 448 outcome is rather common, the risk of underestimation is further enhanced and the true risk of  
40  
41 449 adverse mental health effects could be higher.

42  
43 450 As in any observational study, ours only allows for measurements of  
44  
45 451 associations and cannot determine causation. Furthermore, apparently strong average  
46  
47 452 associations do not necessarily convey a high discriminatory accuracy (see elsewhere for a  
48  
49 453 short review and discussion).(65) Nevertheless, since our analysis yielded a moderate  
50  
51 454 accuracy (i.e., AUC=0.6), the intersectional strata do matter for the propensity to use  
52  
53 455 antidepressants. A consideration in every quantitative intersectional study is the basis for  
54  
55 456 creating intersectional categories, since comprehensive information on background and lived  
56  
57 457 experiences are lacking and the categories are created based on available but crude proxies  
58  
59 458 such as income level. For example, in our study the group of women with immigrant  
60  
459 background was very heterogenous, so we cannot exclude that the increased antidepressant  
460  
461 use is located on more specific country of birth categories. There is an ongoing debate  
462  
whether these crude categorizations are feasible, and extra caution should be taken when  
investigating emerging intersectional categories rather than established ones.(66)

## 463 **Conclusion**

464 It is important to recognise intersectional perspectives and interacting axes of oppression to  
465 tailor better public health interventions, as well as acknowledging the experiences of  
466 oppressed women to reach reproductive and social justice. (29, 66) Our intersectional  
467 MAIHDA methodology operationalizes this idea by providing information on the  
468 discriminatory accuracy of the contexts that define the intersectional strata. It highlights the  
469 need to consider disadvantages consisting of several interlocking structural dimensions such  
470 as income/class, age and immigration to better understand how HC might predispose certain  
471 women, mainly teenagers and low-income women with immigrant background, for  
472 depression. These vulnerabilities are based in inequalities that are not static, but structurally  
473 created and therefore possible to redeem.

474

475

476

477 **Figure 1.** Selection of the study population.

478

479

## 480 **Acknowledgements**

481 A previous version of this study was presented as a poster at the Gynecological  
482 Endocrinology, the 19th World Congress in December 2020. We thank all colleagues at the  
483 Unit for Social epidemiology, Lund university, for valuable discussions.

484

## 485 **Ethical statement**

486 The database was approved by the Regional Ethical Review Board in Lund, Sweden, the Data  
487 Safety Board at Statistics Sweden and the National Board of Health and Welfare (Dnr: 2014/  
488 856, 2015/341).

489

## 490 **Funding statement**

491 This work was supported by The Swedish Research Council (Vetenskapsrådet) grant number:  
492 [2017-01321] <https://www.swecris.se/betasearch/details/project/201701321VR>

493

## 494 **Competing interests**

495 None declared.

1  
2  
3 4964  
5 497 **Data sharing statement**

6 498 Public access to the data is restricted by the Swedish Authorities (Public Access to  
7  
8 499 Information and Secrecy Act; <http://www.government.se/information->  
9  
10 500 [material/2009/09/public-access-to-information-and-secrecy-act/](http://www.government.se/information-material/2009/09/public-access-to-information-and-secrecy-act/)) but data can be made  
11  
12 501 available for researchers after a special review that includes approval of the research project  
13  
14 502 by both an Ethics Committee and the authorities' data safety committees. The National Board  
15  
16 503 of Health and Welfare is a government agency under the Ministry of Health and Social  
17  
18 504 Affairs. It is not their policy to provide individual level data to researchers abroad. Instead,  
19  
20 505 they normally advise researchers in other countries to cooperate with Swedish colleagues, to  
21  
22 506 whom they can provide data according to standard legal provisions and procedures. Requests  
23  
24 507 for access to the data can be made to the National Board of Health and Welfare and Statistics  
25  
26 508 Sweden (<http://www.socialstyrelsen.se/statistics>; [https://www.scb.se/en/services/guidance-](https://www.scb.se/en/services/guidance-for-researchers-and-universities/)  
27  
28 509 [for-researchers-and-universities/](https://www.scb.se/en/services/guidance-for-researchers-and-universities/)).

29 511 **Contributorship statement**

30 512 **Sofia Zettermark:** Conceptualization, design, analysis, interpretation of data, writing original  
31  
32 513 draft, final approval of version to be published.

33  
34 514 **Kani Kahlaf:** Interpretation of data, revising draft critically for intellectual content, final  
35  
36 515 approval of version to be published.

37  
38 516 **Raquel Perez-Vicente:** Design, analysis, interpretation of data, revising draft critically for  
39  
40 517 intellectual content, final approval of version to be published.

41  
42 518 **George Leckie:** Analysis, interpretation of data, revising draft critically for intellectual  
43  
44 519 content, final approval of version to be published.

45  
46 520 **Diana Mulinari:** Interpretation of data, revising draft critically for intellectual content, final  
47  
48 521 approval of version to be published.

49  
50 522 **Juan Merlo:** Conceptualization, design, analysis, interpretation of data, revising draft  
51  
52 523 critically for intellectual content, final approval of version to be published.

53 524

54 525

55 526

56 527 **REFERENCES**

58 528 1 Bitzer J. Hormonal contraception and depression: another Pill scandal? *Eur J Contracept*  
59 529 *Repr* 2017;22(1):1-2.

- 1  
2  
3 530 2 Frokjaer VG. Pharmacological sex hormone manipulation as a risk model for depression. *J*  
4 531 *Neurosci Res* 2020;98(7):1283-92.
- 5 532 3 Rosenberg MJ, Waugh MS. Oral contraceptive discontinuation: a prospective evaluation of  
6 533 frequency and reasons. *Am J Obstet Gynecol* 1998;179(3;1):577-82.
- 7 534 4 Simmons RG, Sanders JN, Geist C, et al. Predictors of contraceptive switching and  
8 535 discontinuation within the first 6 months of use among Highly Effective Reversible  
9 536 Contraceptive Initiative Salt Lake study participants. *Am J Obstet Gynecol*  
10 537 2019;220(4):376e1-e12.
- 11 538 5 Sanders SA, Graham CA, Bass JL, et al. A prospective study of the effects of oral  
12 539 contraceptives on sexuality and well-being and their relationship to discontinuation.  
13 540 *Contraception* 2001;64(1):51-8.
- 14 541 6 Skovlund CW, Morch LS, Kessing LV, et al. Association of Hormonal Contraception With  
15 542 Depression. *JAMA Psychiat* 2016;73(11):1154-62.
- 16 543 7 Zettermark S, Perez Vicente R, Merlo J. Hormonal contraception increases the risk of  
17 544 psychotropic drug use in adolescent girls but not in adults: A pharmacoepidemiological study  
18 545 on 800 000 Swedish women. *PLoS One* 2018;13(3):e0194773  
19 546 doi:10.1371/journal.pone.0194773.
- 20 547 8 Zethraeus N, Dreber A, Ranehill E, et al. A first-choice combined oral contraceptive  
21 548 influences general well-being in healthy women: a double-blind, randomized, placebo-  
22 549 controlled trial. *Fertil Steril* 2017;107(5):1238-45.
- 23 550 9 Lundin C, Malmborg A, Slezak J, et al. Sexual function and combined oral contraceptives -  
24 551 a randomised, placebo-controlled trial. *Endocr Connect* 2018;7(11):1208-1216  
25 552 doi:10.1530/EC-18-0384
- 26 553 10 Gingnell M, Engman J, Frick A, et al. Oral contraceptive use changes brain activity and  
27 554 mood in women with previous negative affect on the pill--a double-blinded, placebo-  
28 555 controlled randomized trial of a levonorgestrel-containing combined oral contraceptive.  
29 556 *Psychoneuroendocrino* 2013;38(7):1133-44.
- 30 557 11 Fisher PM, Larsen CB, Beliveau V et al. Pharmacologically Induced Sex Hormone  
31 558 Fluctuation Effects on Resting-State Functional Connectivity in a Risk Model for Depression:  
32 559 A Randomized Trial. *Neuropsychopharmacol* 2017;42(2):446-53.
- 33 560 12 Toffoletto S, Lanzenberger R, Gingnell M, et al. Emotional and cognitive functional  
34 561 imaging of estrogen and progesterone effects in the female human brain: A systematic review.  
35 562 *Psychoneuroendocrino* 2014;50:28-52.
- 36 563 13 Schaffir J, Worly BL, Gur TL. Combined hormonal contraception and its effects on mood:  
37 564 a critical review. *Eur J Contracept Repr* 2016;21(5):347-55.
- 38 565 14 Robakis T, Williams KE, Nutkiewicz L, et al. Hormonal Contraceptives and Mood:  
39 566 Review of the Literature and Implications for Future Research. *Curr Psychiat Rep*  
40 567 2019;21(7):57. doi:10.1007/s11920-019-1034-z
- 41 568 15 Lewis CA, Kimmig AS, Zsido RG, et al. Effects of Hormonal Contraceptives on Mood: A  
42 569 Focus on Emotion Recognition and Reactivity, Reward Processing, and Stress Response.  
43 570 *Curr Psychiat Rep* 2019;21(11):115.
- 44 571 16 Worly BL, Gur TL, Schaffir J. The relationship between progestin hormonal contraception  
45 572 and depression: a systematic review. *Contraception* 2018;97(6):478-89.
- 46 573 17 de Wit AE, Booij SH, Giltay EJ, et al. Association of Use of Oral Contraceptives With  
47 574 Depressive Symptoms Among Adolescents and Young Women. *JAMA Psychiat*  
48 575 2020;77(1):52-59 doi:10.1001/jamapsychiatry.2019.2838
- 49 576 18 Gregory ST, Hall K, Quast T, et al. Hormonal Contraception, depression, and Academic  
50 577 Performance among females attending college in the United States. *Psychiat Res*  
51 578 2018;270:111-6.

- 1  
2  
3 579 19 Lundin C, Danielsson KG, Bixo M, et al. Combined oral contraceptive use is associated  
4 580 with both improvement and worsening of mood in the different phases of the treatment cycle -  
5 581 A double-blind, placebo-controlled randomized trial. *Psychoneuroendocrino* 2017;76:135-43.  
6 582 20 Bengtsdotter H, Lundin C, Gemzell Danielsson K, Bixo M, Baumgart J, Marions L, et al.  
7 583 Ongoing or previous mental disorders predispose to adverse mood reporting during combined  
8 584 oral contraceptive use. *Eur J Contracept Repr* 2018;23(1):45-51.  
9 585 21 Wemrell M, Mulinari S, Merlo J. An intersectional approach to multilevel analysis of  
10 586 individual heterogeneity (MAIH) and discriminatory accuracy. *Soc Sci Med* 2017;178:217-9.  
11 587 22 Merlo J. Multilevel analysis of individual heterogeneity and discriminatory accuracy  
12 588 (MAIHDA) within an intersectional framework. *Soc Sci Med* 2018;203:74-80.  
13 589 23 Evans CR, Williams DR, Onnela JP, et al. A multilevel approach to modeling health  
14 590 inequalities at the intersection of multiple social identities. *Soc Sci Med* 2018;203:64-73.  
15 591 24 Bauer GR. Incorporating intersectionality theory into population health research  
16 592 methodology: Challenges and the potential to advance health equity. *Soc Sci Med*  
17 593 2014;110:10-7.  
18 594 25 McCall L. The complexity of intersectionality. *Signs* 2005;30:1771-800.  
19 595 26 Evans CR, Erickson N. Intersectionality and depression in adolescence and early  
20 596 adulthood: A MAIHDA analysis of the national longitudinal study of adolescent to adult  
21 597 health, 1995-2008. *Soc Sci Med* 2019;220:1-11.  
22 598 27 Crenshaw K. Mapping the Margins: Intersectionality, Identity Politics, and Violence  
23 599 against Women of Color. *Stanford Law Rev* 1991;43(6):1241-99.  
24 600 28 Cho S, Crenshaw K, McCall L. Toward a field of Intersectionality Studies: Theory,  
25 601 Applications and Praxis. *Signs* 2013;38(4):785-810.  
26 602 29 Price K. It's Not Just About Abortion: Incorporating Intersectionality in Research  
27 603 About Women of Color and Reproduction. *Women Health Iss* 2011;21(3):55-7.  
28 604 30 Ross LJ, Rickie S. Reproductive Justice: An Introduction. Oakland, CA: University of  
29 605 California Press 2017:1-360.  
30 606 31 Dehlendorf C, Ruskin R, Grumbach K, et al. Recommendations for intrauterine  
31 607 contraception: a randomized trial of the effects of patients' race/ethnicity and socioeconomic  
32 608 status. *Am J Obstet Gynecol* 2010;203(4):319e1-8.  
33 609 32 Montoya ER, Bos PA. How Oral Contraceptives Impact Social-Emotional Behavior and  
34 610 Brain Function. *Trends Cogn Sci* 2017;21(2):125-36.  
35 611 33 Persmark A, Wemrell M, Zettermark S, et al. Precision public health: Mapping  
36 612 socioeconomic disparities in opioid dispensations at Swedish pharmacies by Multilevel  
37 613 Analysis of Individual Heterogeneity and Discriminatory Accuracy (MAIHDA). *PLoS One*  
38 614 2019;14(8):e0220322 doi:10.1371/journal.pone.0220322  
39 615 34 Hernandez-Yumar A, Wemrell M, Abasolo Aleson I, et al. Socioeconomic differences in  
40 616 body mass index in Spain: An intersectional multilevel analysis of individual heterogeneity  
41 617 and discriminatory accuracy. *PLoS One* 2018;13(12):e0208624.  
42 618 35 Lorant V, Deliège D, Eaton W, et al. Socioeconomic inequalities in depression: a meta-  
43 619 analysis. *Am J Epidemiol* 2003;157(2):98-112.  
44 620 36 Dehlendorf C, Rodriguez MI, Levy K, et al. Disparities in family planning. *Am J Obstet*  
45 621 *Gynecol* 2010;202(3):214-20.  
46 622 37 Swedish National Board of Health and Welfare. DRG-koder och text 2019 [DRG codes  
47 623 and text 2019]. Available from: <https://www.socialstyrelsen.se/utveckla-verksamhet/e-halsa/klassificering-och-koder/drg/drg-koder-och-definitioner/>. [Accessed 2020 Dec 15]  
48 624 38 Hankivsky O. Women's health, men's health, and gender and health: Implications of  
49 625 intersectionality. *Soc Sci Med* 2012;74(11):1712- 20.  
50 626 39 Frederick A, Shrifrer D. Race and Disability: From Analogy to Intersectionality. *Sociology*  
51 627 *of Race and Ethnicity* 2019;5(2):200-14.  
52 628



- 1  
2  
3 629 40 Knaak S, Mantler E, Szeto A. Mental illness-related stigma in healthcare: Barriers to  
4 630 access and care and evidence-based solutions. *Healthcare Management Forum*  
5 631 2017;30(2):111-6.  
6 632 41 Merlo J, Wagner P, Ghith N, et al. An Original Stepwise Multilevel Logistic Regression  
7 633 Analysis of Discriminatory Accuracy: The Case of Neighbourhoods and Health. *PLoS One*  
8 634 2016;11(4):e0153778.  
9 635 42 Axelsson Fisk S, Mulinari S, Wemrell M, et al. Chronic Obstructive Pulmonary Disease in  
10 636 Sweden: An intersectional multilevel analysis of individual heterogeneity and discriminatory  
11 637 accuracy. *SSM Population Health* 2018;4:334-46.  
12 638 43 Leckie G, Charlton C. Runmlwin - a program to Run the MLwiN multilevel modelling  
13 639 software from within stata. *J Stat Softw* 2013;52(11):1-40.  
14 640 44 Evans CR, Leckie G, Merlo J. Multilevel versus single-level regression for the analysis of  
15 641 multilevel information: The case of quantitative intersectional analysis. *Soc Sci Med*  
16 642 2020;245:112499 doi:10.1016/j.socscimed.2019.112499.  
17 643 45 Fruzzetti F, Fidecicchi T. Hormonal Contraception and Depression: Updated Evidence and  
18 644 Implications in Clinical Practice. *Clin Drug Investig.* 2020;40(12):1097-1106 doi:  
19 645 10.1007/s40261-020-00966-8.  
20  
21  
22 646 46 Segeblad B, Borgström A, Odling V, et al. Prevalence of psychiatric disorders and  
23 647 premenstrual dysphoric symptoms in patients with experience of adverse mood during  
24 648 treatment with combined oral contraceptives. *Contraception* 2009;79(1):50-5.  
25 649 47 Borgström A, Odling V, Ekselius L, et al. Adverse mood effects of combined oral  
26 650 contraceptives in relation to personality traits. *Eur J Obstet Gyn R B* 2008;141(2):127-30.  
27 651 48 Arrighi HM, Hertz-Picciotto I. The evolving concept of the healthy worker survivor effect  
28 652 *Epidemiology* 1995;5(2):189-96 doi: 10.1097/00001648-199403000-00009.  
29 653 49 Josefsson A, Wiréhn A-B, Lindberg M, et al. Continuation rates of oral hormonal  
30 654 contraceptives in a cohort of first-time users: a population-based registry study, Sweden  
31 655 2005–2010. *BMJ Open* 2013;3:e003401 doi:10.1136/bmjopen-2013-003401  
32  
33 656 50 Carlsten A, Waern M, Ekedahl A, et al. Antidepressant medication and suicide in Sweden.  
34 657 *Pharmacoepidem Dr S* 2001;10(6):525-30.  
35 658 51 Kalmar S, Szanto K, Rihmer Z, et al. Antidepressant prescription and suicide rates: effect  
36 659 of age and gender. *Suicide Life Threat* 2008;38(4):363-74.  
37 660 52 Mangrio E, Carlson E, Zdravkovic S. Understanding experiences of the Swedish health  
38 661 care system from the perspective of newly arrived refugees. *BMC Research Notes*  
39 662 2018;11(1):616.  
40 663 53 Kirmayer LJ, Narasiah L, Munoz M, et al. Common mental health problems in immigrants  
41 664 and refugees: general approach in primary care. *Can Med Assoc J* 2011;183(12):E959-67.  
42 665 54 Ditch S, Roberts TA, Hansen S. The influence of health care utilization on the association  
43 666 between hormonal contraception initiation and subsequent depression diagnosis and  
44 667 antidepressant use. *Contraception* 2020;101(4):237-43.  
45 668 55 Brenner H. Political economy and health. In: Amick III B, Levine S, Tarlov A, et al, eds.  
46 669 Society and health. New York, NY: Oxford university press 1995:211–46.  
47 670 56 Lynch JW, Kaplan GA, Salonen JT. Why do poor people behave poorly? Variation in  
48 671 adult health behaviours and psychosocial characteristics by stages of the socioeconomic  
49 672 lifecourse. *Soc Sci Med* 1997;44(6):809-19.  
50 673 57 Collins PY, von Unger H, Armbrister A. Church ladies, good girls, and locas: stigma and  
51 674 the intersection of gender, ethnicity, mental illness, and sexuality in relation to HIV risk. *Soc*  
52 675 *Sci Med* 2008;67(3):389-97.  
53 676 58 Honjo K. Social epidemiology: Definition, history, and research examples. *Environ Health*  
54 677 *Prev* 2004;9(5):193-9.

- 1  
2  
3 678 59 Kubzansky L, Kawachi I. Affective States and Health. In: Berkman L, Kawachi I, eds.  
4 679 Social epidemiology. New York, NY: Oxford University Press 2000:13–41.  
5 680 60 Krieger N. Epidemiology and the Peoples Health - Theory and Context. Oxford: Oxford  
6 681 University Press 2011:1-381.  
7  
8 682 61 Krieger N. Epidemiology and social sciences: towards a critical reengagement in the 21st  
9 683 century. *Epidemiol Rev* 2000;22(1):155-63.  
10 684 62 Link B, Phelan J. Social conditions as fundamental causes of disease. *J Health Soc Behav*  
11 685 1995(Extra Issue:Forty Years of Medical Sociology):80-94  
12 686 59 Schatzberg AF. New indications for antidepressants. *J Clin Psychiat* 2000;61(Suppl)11:9-  
13 687 17.  
14 688 63 Gardarsdottir H, Heerdink ER, van Dijk L, et al. Indications for antidepressant drug  
15 689 prescribing in general practice in the Netherlands. *J Affect Disorders* 2007;98(1-2):109-15.  
16 690 64 Merlo J, Mulinari S, Wemrell M, et al. The tyranny of the averages and the indiscriminate  
17 691 use of risk factors in public health: The case of coronary heart disease. *SSM Population*  
18 692 *Health* 2017;3:684-98 doi:10.1016/j.ssmph.2017.08.005  
19 693 65 Warner LR. A Best Practices Guide to Intersectional Approaches in Psychological  
20 694 Research. *Sex Roles* 2008;59:454–63.  
21 695 66 Marmot M. Social justice, epidemiology and health inequalities. *Eur J Epidemiol*  
22 696 2017;32(7):537-46.  
23  
24  
25  
26  
27  
28  
29  
30  
31  
32  
33  
34  
35  
36  
37  
38  
39  
40  
41  
42  
43  
44  
45  
46  
47  
48  
49  
50  
51  
52  
53  
54  
55  
56  
57  
58  
59  
60

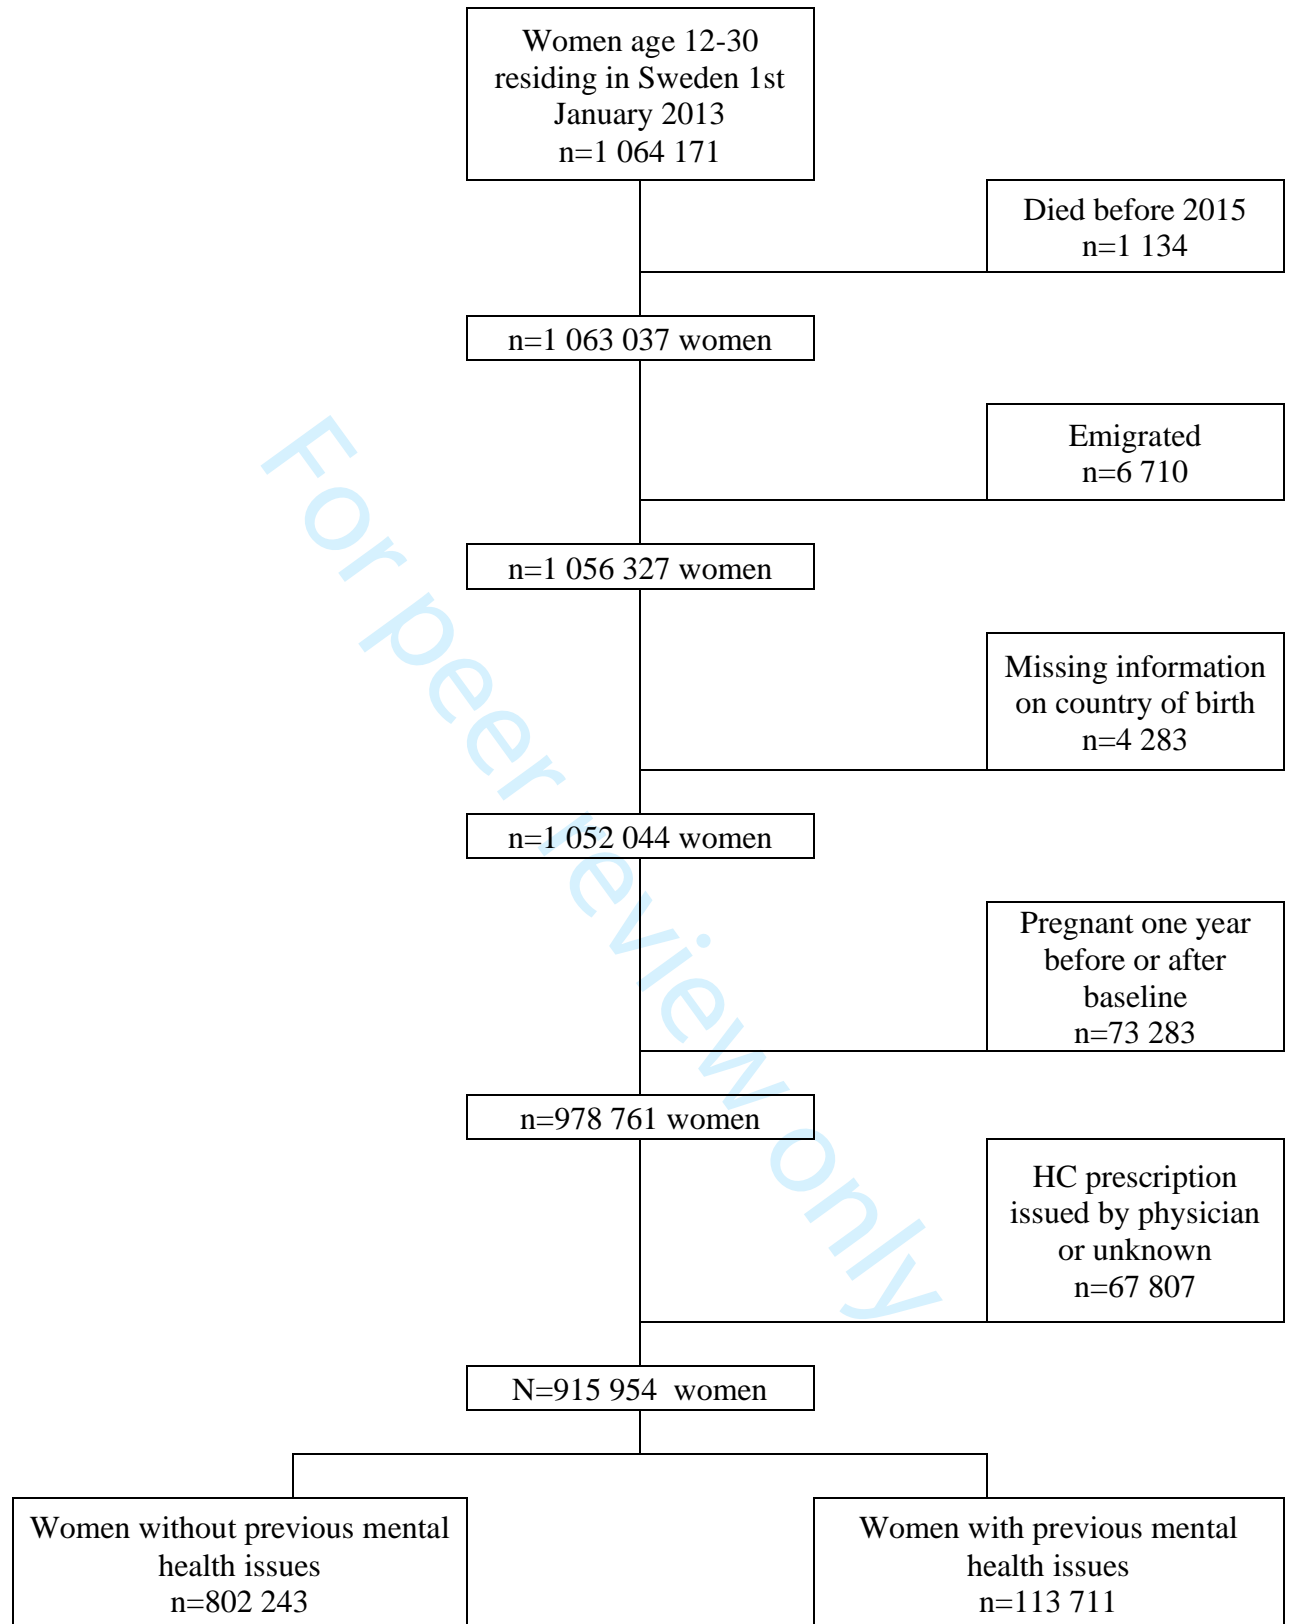

**Figure 1.** Selection of the study population.

```

1
2
3 * Hormonal Contraception and Antidepressant Use in Sweden: An
4 Intersectional Multilevel Analysis of Individual Heterogeneity and
5 Discriminatory Accuracy
6 * (MAIHDA)
7 *****
8 clear *
9 global MLwiN_path "C:\Program Files\MLwiN v3.05\mlwin.exe"
10 set cformat %9.2f
11
12
13 *****
14 * TABLE 1
15 *****
16
17 * Load the data
18 use "final_mlMENTAL.dta", clear
19 keep age_cat1 age_cat2 age_cat3 inc1 inc2 inc3 imm pp proportion denom
20 order age_cat1 age_cat2 age_cat3 inc1 inc2 inc3 imm pp proportion denom
21
22 generate percentage = 100*proportion
23 drop proportion
24 format %9.2f percentage
25
26 generate age_cat = .
27 replace age_cat = 1 if age_cat1==1
28 replace age_cat = 2 if age_cat2==1
29 replace age_cat = 3 if age_cat3==1
30
31 generate inc_cat = .
32 replace inc_cat = 1 if inc1==1
33 replace inc_cat = 2 if inc2==1
34 replace inc_cat = 3 if inc3==1
35
36 * Results for the table
37 tabulate pp [fweight = denom]
38 table pp [fweight = denom], contents(mean percentage )
39 tabulate age_cat pp [fweight = denom], column nofreq
40 tabulate inc_cat pp [fweight = denom], column nofreq
41 tabulate imm pp [fweight = denom], column nofreq
42
43 *****
44 * TABLE 2: MODEL 1
45 *****
46
47 * Load the data
48 use "final_mlMENTAL.dta", clear
49
50 * IGLS estimation, for MCMC initial values
51 runmlwin prop cons, ///
52   level2(inter: cons) ///
53   level1(inter:) ///
54   discrete(distribution(binomial) link(logit) denom(denom) mql1) ///
55   nopause
56
57 * MCMC
58 runmlwin prop cons, ///
59   level2(inter: cons, residuals(u, savechains("mlu.dta",replace))) ///
60   level1(inter:) ///

```

```

1
2
3     discrete(distribution(binomial) link(logit) denom(denom)) ///
4     mcmc(burnin(10000) chain(50000) thin(10) savechains("mlb.dta", replace))
5     ///
6     initsprevious ///
7     nopause
8
9     * Level-2 variance
10    scalar mlsigma2u = [RP2]var(cons)
11    scalar list mlsigma2u
12
13    * Level-1 variance
14    scalar mlsigma2e = _pi^2/3
15    scalar list mlsigma2e
16
17    * VPC
18    display "VPC_u = " %9.4f mlsigma2u/(mlsigma2u + mlsigma2e)
19
20    * Compress and save the data
21    compress
22    save "ml.dta", replace
23
24
25    *-----*
26    * PREPARE FIXED-PART PAREMETER CHAINS
27    *-----*
28
29    use "mlb.dta", clear
30    drop deviance RP2_var_cons_ OD_bcons_1
31    rename FP1_* b_*
32    format %9.2f b_*
33    compress
34    save "mlb_prepped.dta", replace
35    isid iteration
36    codebook iteration, compact
37
38
39    *-----*
40    * PREPARE RANDOM EFFECTS CHAINS
41    *-----*
42
43    use "mlu.dta", clear
44    drop residual idnum
45    rename value u
46    format %9.2f u
47    sort inter iteration
48    order inter iteration
49    compress
50    save "mlu_prepped.dta", replace
51    isid inter iteration
52    codebook iteration, compact
53
54
55    *-----*
56    * MERGE DATA, FIXED-PART PARAMETER AND RANDOM EFFECT CHAINS TOGETHER
57    *-----*
58
59    use "final_mlMENTAL", clear
60    count
61    cross using "mlb_prepped.dta"
62    count

```

```

1
2
3 merge m:1 inter iteration using "mlu_prepped.dta", nogenerate assert(match)
4 count
5 compress
6 save "mldata_prepped.dta", replace
7
8
9
10 *-----*
11 * ROC
12 *-----*
13 use "mldata_prepped.dta", clear
14 count
15 generate p = invlogit(b_cons + u)
16 gcollapse (mean) p, by(inter num denom)
17 count
18 expand denom
19 sort inter
20 bysort inter: generate y = (_n<=numerator)
21 generate prop = denom/_N
22 generate weight = int(1/prop)
23 roctab y p [fw=weight]
24
25
26 *-----*
27 * TABLE 3
28 *-----*
29 use "mldata_prepped.dta", clear
30 keep iteration inter age_cat1 age_cat2 age_cat3 incl1 incl2 incl3 imm pp denom
31 b_cons u
32 count
33 generate p = 100*invlogit(b_cons + u)
34 drop b_cons u
35 format %9.1f p
36 drop inter
37 reshape wide denom p, i(iteration age_cat1 age_cat2 age_cat3 incl1 incl2 incl3
38 imm) j(pp)
39 generate denom = denom0 + denom1
40 drop denom0 denom1
41 generate pdiff = p1 - p0
42 gcollapse (mean) p0 p1 pdiff (p2.5) pdifflo=pdiff (p97.5) pdiffhi=pdiff,
43 by(age_cat1 age_cat2 age_cat3 incl1 incl2 incl3 imm denom)
44 format %9.1f pdiff pdifflo pdiffhi
45 order p1 p0 pdiff pdifflo pdiffhi, last
46 gsort -age_cat1 -age_cat2 -age_cat3 -incl1 -incl2 -incl3 imm
47
48
49 *****
50 * TABLE 2: MODEL 2:
51 *****
52
53 * Load the data
54 use "final_mlMENTAL.dta", clear
55
56 * IGLS estimation, for MCMC initial values
57 runmlwin prop cons age_cat2 age_cat3 incl1 incl2 imm pp, ///
58 level2(inter: cons) ///
59 level1(inter:) ///
60 discrete(distribution(binomial) link(logit) denom(denom) mql1) ///
nopause

```

```

1
2
3
4 * MCMC
5 runmlwin prop cons age_cat2 age_cat3 incl inc2 imm pp, ///
6   level2(inter: cons, residuals(u,savechains("m2u.dta",replace))) ///
7   level1(inter:) ///
8   discrete(distribution(binomial) link(logit) denom(denom)) ///
9   mcmc(burnin(10000) chain(50000) thin(10) savechains("m2b.dta", replace))
10  ///
11  initsprevious ///
12  nopause
13
14 * Odds ratios
15 runmlwin, or
16
17 * Level-2 variance
18 scalar m2sigma2u = [RP2]var(cons)
19 scalar list m2sigma2u
20
21 * Level-1 variance
22 scalar m2sigma2e = _pi^2/3
23 scalar list m2sigma2e
24
25 * VPC
26 display "VPC_u = " %9.4f m2sigma2u/(m2sigma2u + m2sigma2e)
27
28 * Compress and save the data
29 compress
30 save "m2.dta", replace
31
32 * PCV
33 display "PCV = " %9.4f (m2sigma2u - m1sigma2u)/m1sigma2u
34
35 *-----*
36 * PREPARE FIXED-PART PAREMETER CHAINS
37 *-----*
38 use "m2b.dta", clear
39 drop deviance RP2_var_cons_ OD_bcons_1
40 rename FP1_* b_*
41 format %9.2f b_*
42 compress
43 save "m2b_prepped.dta", replace
44 isid iteration
45 codebook iteration, compact
46
47
48 *-----*
49 * PREPARE inter RANDOM EFFECTS CHAINS
50 *-----*
51 use "m2u.dta", clear
52 drop residual idnum
53 rename value u
54 format %9.2f u
55 sort inter iteration
56 order inter iteration
57 compress
58 save "m2u_prepped.dta", replace
59 isid inter iteration
60 codebook iteration, compact

```

```

1
2
3
4
5
6 *-----*
7 * MERGE DATA, FIXED-PART PARAMETER AND RANDOM EFFECT CHAINS TOGETHER
8 *-----*
9 use "final_mlMENTAL", clear
10 count
11 cross using "m2b_prepped.dta"
12 count
13 merge m:1 inter iteration using "m2u_prepped.dta"
14 count
15 save "m2data_prepped.dta", replace
16
17
18 *-----*
19 * ROC
20 *-----*
21 use "m2data_prepped.dta", clear
22 count
23 generate p = invlogit(b_cons + b_age_cat2*age_cat2 + b_age_cat3*age_cat3 +
24 b_incl*incl + b_inc2*inc2 + b_imm*imm + b_pp*pp)
25 gcollapse (mean) p, by(inter num denom)
26 count
27 expand denom
28 sort inter
29 bysort inter: generate y = (_n<=numerator)
30 generate prop = denom/_N
31 generate weight = int(1/prop)
32 roctab y p [fw=weight]
33
34
35 *-----*
36 * TABLE 3
37 *-----*
38 use "m1data_prepped.dta", clear
39 keep iteration inter age_cat1 age_cat2 age_cat3 incl inc2 inc3 imm pp denom
40 b_cons u
41 count
42 generate p = 100*invlogit(b_cons + u)
43 drop b_cons u
44 format %9.1f p
45 drop inter
46 reshape wide denom p, i(iteration age_cat1 age_cat2 age_cat3 incl inc2 inc3
47 imm) j(pp)
48 generate denom = denom0 + denom1
49 drop denom0 denom1
50 generate pdiff = p1 - p0
51 gcollapse (mean) p0 p1 pdiff (p2.5) pdifflo=pdiff (p97.5) pdiffhi=pdiff,
52 by(age_cat1 age_cat2 age_cat3 incl inc2 inc3 imm denom)
53 format %9.1f pdiff pdifflo pdiffhi
54 order p1 p0 pdiff pdifflo pdiffhi, last
55 gsort -age_cat1 -age_cat2 -age_cat3 -incl -inc2 -inc3 imm
56
57
58 *****
59 exit
60

```



```

1
2
3 *****
4 * Hormonal Contraception and Antidepressant Use in Sweden: An
5 Intersectional Multilevel Analysis of Individual Heterogeneity and
6 Discriminatory Accuracy (MAIHDA)
7 *****
8 clear *
9 global MLwiN_path "C:\Program Files\MLwiN v3.05\mlwin.exe"
10 set cformat %9.2f
11
12
13
14 *****
15 * TABLE 1
16 *****
17
18 * Load the data
19 use "final_mlNoMENTAL.dta", clear
20 keep age_cat1 age_cat2 age_cat3 inc1 inc2 inc3 imm pp proportion denom
21 order age_cat1 age_cat2 age_cat3 inc1 inc2 inc3 imm pp proportion denom
22
23 generate percentage = 100*proportion
24 drop proportion
25 format %9.2f percentage
26
27 generate age_cat = .
28 replace age_cat = 1 if age_cat1==1
29 replace age_cat = 2 if age_cat2==1
30 replace age_cat = 3 if age_cat3==1
31
32 generate inc_cat = .
33 replace inc_cat = 1 if inc1==1
34 replace inc_cat = 2 if inc2==1
35 replace inc_cat = 3 if inc3==1
36
37 * Results for the table
38 tabulate pp [fweight = denom]
39 table pp [fweight = denom], contents(mean percentage )
40 tabulate age_cat pp [fweight = denom], column nofreq
41 tabulate inc_cat pp [fweight = denom], column nofreq
42 tabulate imm pp [fweight = denom], column nofreq
43
44
45 *****
46 * TABLE 2: MODEL 1
47 *****
48
49 * Load the data
50 use "final_mlNoMENTAL.dta", clear
51
52 * IGLS estimation, for MCMC initial values
53 runmlwin prop cons, ///
54   level2(inter: cons) ///
55   level1(inter:) ///
56   discrete(distribution(binomial) link(logit) denom(denom) mql1) ///
57   nopause
58
59 * MCMC
60 runmlwin prop cons, ///
61   level2(inter: cons, residuals(u, savechains("mlu.dta",replace))) ///

```

```

1
2
3     levell(inter:) ///
4     discrete(distribution(binomial) link(logit) denom(denom)) ///
5     mcmc(burnin(10000) chain(50000) thin(10) savechains("mlb.dta", replace))
6 ///
7     initsprevious ///
8     nopause
9
10    * Level-2 variance
11    scalar mlsigma2u = [RP2]var(cons)
12    scalar list mlsigma2u
13
14    * Level-1 variance
15    scalar mlsigma2e = _pi^2/3
16    scalar list mlsigma2e
17
18    * VPC
19    display "VPC_u = " %9.4f mlsigma2u/(mlsigma2u + mlsigma2e)
20
21    * Compress and save the data
22    compress
23    save "ml.dta", replace
24
25
26    *-----*
27    * PREPARE FIXED-PART PAREMETER CHAINS
28    *-----*
29
30    use "mlb.dta", clear
31    drop deviance RP2_var_cons_ OD_bcons_1
32    rename FP1_* b_*
33    format %9.2f b_*
34    compress
35    save "mlb_prepped.dta", replace
36    isid iteration
37    codebook iteration, compact
38
39
40    *-----*
41    * PREPARE RANDOM EFFECTS CHAINS
42    *-----*
43
44    use "mlu.dta", clear
45    drop residual idnum
46    rename value u
47    format %9.2f u
48    sort inter iteration
49    order inter iteration
50    compress
51    save "mlu_prepped.dta", replace
52    isid inter iteration
53    codebook iteration, compact
54
55    *-----*
56    * MERGE DATA, FIXED-PART PARAMETER AND RANDOM EFFECT CHAINS TOGETHER
57    *-----*
58
59    use "final_mlnOMENTAL", clear
60    count
61    cross using "mlb_prepped.dta"

```

```

1
2
3     count
4     merge m:1 inter iteration using "mlu_prepped.dta", nogenerate assert(match)
5     count
6     compress
7     save "mldata_prepped.dta", replace
8
9
10
11     *-----*
12     * ROC
13     *-----*
14     use "mldata_prepped.dta", clear
15     count
16     generate p = invlogit(b_cons + u)
17     gcollapse (mean) p, by(inter num denom)
18     count
19     expand denom
20     sort inter
21     bysort inter: generate y = (_n<=numerator)
22     generate prop = denom/_N
23     generate weight = int(1/prop)
24     roctab y p [fw=weight]
25
26
27     *-----*
28     * TABLE 3
29     *-----*
30     use "mldata_prepped.dta", clear
31     keep iteration inter age_cat1 age_cat2 age_cat3 incl1 incl2 incl3 imm pp denom
32     b_cons u
33     count
34     generate p = 100*invlogit(b_cons + u)
35     drop b_cons u
36     format %9.1f p
37     drop inter
38     reshape wide denom p, i(iteration age_cat1 age_cat2 age_cat3 incl1 incl2 incl3
39     imm) j(pp)
40     generate denom = denom0 + denom1
41     drop denom0 denom1
42     generate pdiff = p1 - p0
43     gcollapse (mean) p0 p1 pdiff (p2.5) pdifflo=pdiff (p97.5) pdiffhi=pdiff,
44     by(age_cat1 age_cat2 age_cat3 incl1 incl2 incl3 imm denom)
45     format %9.1f pdiff pdifflo pdiffhi
46     order p1 p0 pdiff pdifflo pdiffhi, last
47     gsort -age_cat1 -age_cat2 -age_cat3 -incl1 -incl2 -incl3 imm
48
49
50     *****
51     * TABLE 2: MODEL 2:
52     *****
53
54     * Load the data
55     use "final_mlNoMENTAL.dta", clear
56
57     * IGLS estimation, for MCMC initial values
58     runmlwin prop cons age_cat2 age_cat3 incl1 incl2 imm pp, ///
59     level2(inter: cons) ///
60     levell(inter:) ///
61     discrete(distribution(binomial) link(logit) denom(denom) mql1) ///

```

```

1
2
3     nopause
4
5 * MCMC
6 runmlwin prop cons age_cat2 age_cat3 incl inc2 imm pp, ///
7     level2(inter: cons, residuals(u,savechains("m2u.dta",replace))) ///
8     level1(inter:) ///
9     discrete(distribution(binomial) link(logit) denom(denom)) ///
10    mcmc(burnin(10000) chain(50000) thin(10) savechains("m2b.dta", replace))
11    ///
12    initsprevious ///
13    nopause
14
15 * Odds ratios
16 runmlwin, or
17
18 * Level-2 variance
19 scalar m2sigma2u = [RP2]var(cons)
20 scalar list m2sigma2u
21
22 * Level-1 variance
23 scalar m2sigma2e = _pi^2/3
24 scalar list m2sigma2e
25
26 * VPC
27 display "VPC_u = " %9.4f m2sigma2u/(m2sigma2u + m2sigma2e)
28
29 * Compress and save the data
30 compress
31 save "m2.dta", replace
32
33 * PCV
34 display "PCV = " %9.4f (m2sigma2u - m1sigma2u)/m1sigma2u
35
36 *-----*
37 * PREPARE FIXED-PART PAREMETER CHAINS
38 *-----*
39 use "m2b.dta", clear
40 drop deviance RP2_var_cons_ OD_bcons_1
41 rename FP1_* b_*
42 format %9.2f b_*
43 compress
44 save "m2b_prepped.dta", replace
45 isid iteration
46 codebook iteration, compact
47
48
49 *-----*
50 * PREPARE inter RANDOM EFFECTS CHAINS
51 *-----*
52 use "m2u.dta", clear
53 drop residual idnum
54 rename value u
55 format %9.2f u
56 sort inter iteration
57 order inter iteration
58 compress
59 save "m2u_prepped.dta", replace
60 isid inter iteration

```

```

1
2
3 codebook iteration, compact
4
5
6
7 *-----*
8 * MERGE DATA, FIXED-PART PARAMETER AND RANDOM EFFECT CHAINS TOGETHER
9 *-----*
10 use "final_mlNoMENTAL", clear
11 count
12 cross using "m2b_prepped.dta"
13 count
14 merge m:1 inter iteration using "m2u_prepped.dta"
15 count
16 save "m2data_prepped.dta", replace
17
18
19 *-----*
20 * ROC
21 *-----*
22 use "m2data_prepped.dta", clear
23 count
24 generate p = invlogit(b_cons + b_age_cat2*age_cat2 + b_age_cat3*age_cat3 +
25 b_incl*incl + b_inc2*inc2 + b_imm*imm + b_pp*pp)
26 gcollapse (mean) p, by(inter num denom)
27 count
28 expand denom
29 sort inter
30 bysort inter: generate y = (_n<=numerator)
31 generate prop = denom/_N
32 generate weight = int(1/prop)
33 roctab y p [fw=weight]
34
35
36 *-----*
37 * TABLE 3
38 *-----*
39 use "m1data_prepped.dta", clear
40 keep iteration inter age_cat1 age_cat2 age_cat3 incl inc2 inc3 imm pp denom
41 b_cons u
42 count
43 generate p = 100*invlogit(b_cons + u)
44 drop b_cons u
45 format %9.1f p
46 drop inter
47 reshape wide denom p, i(iteration age_cat1 age_cat2 age_cat3 incl inc2 inc3
48 imm) j(pp)
49 generate denom = denom0 + denom1
50 drop denom0 denom1
51 generate pdiff = p1 - p0
52 gcollapse (mean) p0 p1 pdiff (p2.5) pdifflo=pdiff (p97.5) pdiffhi=pdiff,
53 by(age_cat1 age_cat2 age_cat3 incl inc2 inc3 imm denom)
54 format %9.1f pdiff pdifflo pdiffhi
55 order p1 p0 pdiff pdifflo pdiffhi, last
56 gsort -age_cat1 -age_cat2 -age_cat3 -incl -inc2 -inc3 imm
57
58
59 *****
60 exit

```

1  
2  
3  
4  
5  
6  
7  
8  
9  
10  
11  
12  
13  
14  
15  
16  
17  
18  
19  
20  
21  
22  
23  
24  
25  
26  
27  
28  
29  
30  
31  
32  
33  
34  
35  
36  
37  
38  
39  
40  
41  
42  
43  
44  
45  
46  
47  
48  
49  
50  
51  
52  
53  
54  
55  
56  
57  
58  
59  
60

For peer review only

1  
2 pp,imm,inter,age\_cat1,age\_cat2,age\_cat3,inc1,inc2,inc3,proportion,numerator,denom,cons  
3 0,0,12-17 Low income 0 0,1,0,0,1,0,0,.013224002,279,21098,1  
4 1,0,12-17 Low income 0 1,1,0,0,1,0,0,.037408244,265,7084,1  
5 0,1,12-17 Low income 1 0,1,0,0,1,0,0,.0040497542,28,6914,1  
6 1,1,12-17 Low income 1 1,1,0,0,1,0,0,.0096021947,7,729,1  
7  
8 0,0,12-17 Middle income 0 0,1,0,0,0,1,0,.010099272,587,58123,1  
9 1,0,12-17 Middle income 0 1,1,0,0,0,1,0,.030316716,537,17713,1  
10 0,1,12-17 Middle income 1 0,1,0,0,0,1,0,.0056107035,52,9268,1  
11 1,1,12-17 Middle income 1 1,1,0,0,0,1,0,.017814728,15,842,1  
12  
13 0,0,12-17 High income 0 0,1,0,0,0,0,1,.008893352,859,96589,1  
14 1,0,12-17 High income 0 1,1,0,0,0,0,1,.01951286,572,29314,1  
15 0,1,12-17 High income 1 0,1,0,0,0,0,1,.0076045627,30,3945,1  
16 1,1,12-17 High income 1 1,1,0,0,0,0,1,.025718609,17,661,1  
17  
18 0,0,18-23 Low income 0 0,0,1,0,1,0,0,.029676914,530,17859,1  
19 1,0,18-23 Low income 0 1,0,1,0,1,0,0,.034916617,938,26864,1  
20 0,1,18-23 Low income 1 0,0,1,0,1,0,0,.011607248,98,8443,1  
21 1,1,18-23 Low income 1 1,0,1,0,1,0,0,.022702307,62,2731,1  
22  
23 0,0,18-23 Middle income 0 0,0,1,0,0,1,0,.027664155,771,27870,1  
24 1,0,18-23 Middle income 0 1,0,1,0,0,1,0,.0282459,1247,44148,1  
25 0,1,18-23 Middle income 1 0,0,1,0,0,1,0,.011609907,75,6460,1  
26 1,1,18-23 Middle income 1 1,0,1,0,0,1,0,.023316063,54,2316,1  
27  
28 0,0,18-23 High income 0 0,0,1,0,0,0,1,.023347162,1058,45316,1  
29 1,0,18-23 High income 0 1,0,1,0,0,0,1,.022887168,2082,90968,1  
30 0,1,18-23 High income 1 0,0,1,0,0,0,1,.017995911,44,2445,1  
31 1,1,18-23 High income 1 1,0,1,0,0,0,1,.019577537,38,1941,1  
32  
33 0,0,24-30 Low income 0 0,0,0,1,1,0,0,.032189574,2168,67351,1  
34 1,0,24-30 Low income 0 1,0,0,1,1,0,0,.031126546,1954,62776,1  
35 0,1,24-30 Low income 1 0,0,0,1,1,0,0,.013751426,446,32433,1  
36 1,1,24-30 Low income 1 1,0,0,1,1,0,0,.026964672,187,6935,1  
37  
38 0,0,24-30 Middle income 0 0,0,0,1,0,1,0,.030455342,818,26859,1  
39 1,0,24-30 Middle income 0 1,0,0,1,0,1,0,.03591495,652,18154,1  
40 0,1,24-30 Middle income 1 0,0,0,1,0,1,0,.023714487,202,8518,1  
41 1,1,24-30 Middle income 1 1,0,0,1,0,1,0,.027789129,68,2447,1  
42  
43 0,0,24-30 High income 0 0,0,0,1,0,0,1,.025993951,593,22813,1  
44 1,0,24-30 High income 0 1,0,0,1,0,0,1,.024208747,501,20695,1  
45 0,1,24-30 High income 1 0,0,0,1,0,0,1,.023088569,61,2642,1  
46 1,1,24-30 High income 1 1,0,0,1,0,0,1,.019407559,19,979,1  
47  
48  
49  
50  
51  
52  
53  
54  
55  
56  
57  
58  
59  
60

1  
2 pp,imm,inter,age\_cat1,age\_cat2,age\_cat3,inc1,inc2,inc3,proportion,numerator,denom,cons  
3 0,0,12-17 Low income 0 0,1,0,0,1,0,0,.22574355,463,2051,1  
4 1,0,12-17 Low income 0 1,1,0,0,1,0,0,.3049593,412,1351,1  
5 0,1,12-17 Low income 1 0,1,0,0,1,0,0,.12383901,40,323,1  
6 1,1,12-17 Low income 1 1,1,0,0,1,0,0,.1891892,21,111,1  
7  
8 0,0,12-17 Middle income 0 0,1,0,0,0,1,0,.23362993,1024,4383,1  
9 1,0,12-17 Middle income 0 1,1,0,0,0,1,0,.31201944,771,2471,1  
10 0,1,12-17 Middle income 1 0,1,0,0,0,1,0,.13422818,60,447,1  
11 1,1,12-17 Middle income 1 1,1,0,0,0,1,0,.18032786,22,122,1  
12  
13 0,0,12-17 High income 0 0,1,0,0,0,0,1,.28093326,1469,5229,1  
14 1,0,12-17 High income 0 1,1,0,0,0,0,1,.34217408,916,2677,1  
15 0,1,12-17 High income 1 0,1,0,0,0,0,1,.18867925,50,265,1  
16 1,1,12-17 High income 1 1,1,0,0,0,0,1,.3018868,32,106,1  
17  
18 0,0,18-23 Low income 0 0,0,1,0,1,0,0,.37809917,2013,5324,1  
19 1,0,18-23 Low income 0 1,0,1,0,1,0,0,.39212543,2201,5613,1  
20 0,1,18-23 Low income 1 0,0,1,0,1,0,0,.19350649,149,770,1  
21 1,1,18-23 Low income 1 1,0,1,0,1,0,0,.28291318,101,357,1  
22  
23 0,0,18-23 Middle income 0 0,0,1,0,0,1,0,.36302635,2164,5961,1  
24 1,0,18-23 Middle income 0 1,0,1,0,0,1,0,.37776819,2627,6954,1  
25 0,1,18-23 Middle income 1 0,0,1,0,0,1,0,.19285715,108,560,1  
26 1,1,18-23 Middle income 1 1,0,1,0,0,1,0,.27112675,77,284,1  
27  
28 0,0,18-23 High income 0 0,0,1,0,0,0,1,.39782199,2959,7438,1  
29 1,0,18-23 High income 0 1,0,1,0,0,0,1,.38269973,3765,9838,1  
30 0,1,18-23 High income 1 0,0,1,0,0,0,1,.25,82,328,1  
31 1,1,18-23 High income 1 1,0,1,0,0,0,1,.27906978,84,301,1  
32  
33 0,0,24-30 Low income 0 0,0,0,1,1,0,0,.49862742,9082,18214,1  
34 1,0,24-30 Low income 0 1,0,0,1,1,0,0,.50085437,5569,11119,1  
35 0,1,24-30 Low income 1 0,0,0,1,1,0,0,.32457545,1013,3121,1  
36 1,1,24-30 Low income 1 1,0,0,1,1,0,0,.37422037,360,962,1  
37  
38 0,0,24-30 Middle income 0 0,0,0,1,0,1,0,.50859779,2869,5641,1  
39 1,0,24-30 Middle income 0 1,0,0,1,0,1,0,.49799198,1488,2988,1  
40 0,1,24-30 Middle income 1 0,0,0,1,0,1,0,.37214136,358,962,1  
41 1,1,24-30 Middle income 1 1,0,0,1,0,1,0,.33590734,87,259,1  
42  
43 0,0,24-30 High income 0 0,0,0,1,0,0,1,.48993289,1971,4023,1  
44 1,0,24-30 High income 0 1,0,0,1,0,0,1,.48666918,1296,2663,1  
45 0,1,24-30 High income 1 0,0,0,1,0,0,1,.37669376,139,369,1  
46 1,1,24-30 High income 1 1,0,0,1,0,0,1,.45238096,57,126,1  
47  
48  
49  
50  
51  
52  
53  
54  
55  
56  
57  
58  
59  
60



## Supplementary material 5

Supplementary table, summary statistics. Numbers are percentages (numbers within brackets).

|                             |        | Hormonal contraception | Mental health issues |
|-----------------------------|--------|------------------------|----------------------|
| <i>Age</i>                  | 12-17  | 23.2 (63 181)          | 7.2 (19 536)         |
|                             | 18-23  | 59.9 (192 315)         | 13.6 (43 729)        |
|                             | 24-30  | 40.3 (130 103)         | 15.6 (50 447)        |
| <i>Income</i>               | Low    | 40.8 (126 632)         | 15.9 (49 316)        |
|                             | Middle | 38.9 (98 698)          | 12.2 (31 032)        |
|                             | High   | 45.6 (160 269)         | 9.5 (33 363)         |
| <i>Immigrant background</i> | No     | 45.1 (363 390)         | 12.9 (103 938)       |
|                             | Yes    | 20.1 (22 209)          | 8.9 (9 773)          |

**Supplementary table.** Percentage of women within each intersectional dimension using hormonal contraceptives and with previous mental health issues.

## Supplementary material 6

| ATC     | Freq.   | Percent |
|---------|---------|---------|
| G02BA03 | 12 535  | 3.25    |
| G02BB   | 96      | 0.02    |
| G0BB01  | 26 022  | 6.75    |
| G02BB01 | 48      | 0.01    |
| G03AA03 | 4 786   | 1.24    |
| G03AA07 | 126 061 | 32.69   |
| G03AA09 | 3 227   | 0.84    |
| G03AA11 | 15 463  | 4.01    |
| G03AA12 | 4 596   | 13.69   |
| G03AA13 | 12 329  | 1.19    |
| G03AA14 | 5 958   | 3.20    |
| G03AB   | 5 958   | 1.55    |
| G03AB03 | 8 014   | 2.08    |
| G03AB04 | 5 341   | 1.39    |
| G03AC01 | 4 249   | 1.10    |
| G03AC02 | 2 483   | 0.64    |
| G03AC06 | 2 710   | 0.70    |
| G03AC08 | 21 284  | 5.52    |
| G03AC09 | 77 595  | 20.12   |

**Supplementary table, frequency table of hormonal contraceptives.** Frequency of all included hormonal contraceptives in the final cohort of 915 954 women.

## Supplementary material 7

**Sensitivity analysis only including only new users and never-users of HC. Women with any dispensed prescription of HC during five years prior to baseline were excluded and only women with a HC prescription fill exclusively during follow-up are included as users. Non-users of HC are defined as not filing any prescription of HC during five years prior to baseline or during follow-up.**

**Table 1.** Characteristics of the 532 543 women aged 12 - 30 years by previous mental health issues and use of hormonal contraceptives. Values are percentages (number of women in parenthesis).

|                                 | Previous mental health issues |                      |                       |                       |
|---------------------------------|-------------------------------|----------------------|-----------------------|-----------------------|
|                                 | Yes<br>11.12 (59 238)         |                      | No<br>88.88 (473 305) |                       |
|                                 | Use of HC                     |                      | Use of HC             |                       |
|                                 | Yes<br>38.87 (23 034)         | No<br>61.13 (36 214) | Yes<br>1.83 (8 678)   | No<br>98.17 (464 627) |
| Antidepressant during follow-up | 60.11 (35 610)                | 39.89 (23 629)       |                       |                       |
| Age                             |                               |                      |                       |                       |
| 12-17 years                     | 32.53 (4 065)                 | 25.56 (11 946)       | 43.24 (38 426)        | 50.37 (193 658)       |
| 18-23 years                     | 37.18 (4 646)                 | 27.22 (12 722)       | 35.44 (31 489)        | 20.09 (77 244)        |
| 24-30 years                     | 30.28 (3 784)                 | 47.23 (22 075)       | 21.32 (18 948)        | 29.53 (113 540)       |
| Income level                    |                               |                      |                       |                       |
| Low inc.                        | 35.93 (4 489)                 | 43.77 (20 458)       | 24.00 (21 331)        | 30.34 (116 635)       |
| Medium inc.                     | 30.21 (3 775)                 | 28.13 (13 147)       | 29.43 (26 151)        | 30.46 (117 109)       |
| High inc.                       | 33.86 (4 231)                 | 28.11 (13 138)       | 46.57 (41 381)        | 39.20 (150 698)       |
| Immigrant background            |                               |                      |                       |                       |
| None                            | 92.84 (11 600)                | 88.12 (41 188)       | 91.78 (81 560)        | 81.40 (312 926)       |
| Yes                             | 7.16 (895)                    | 11.88 (5 555)        | 8.22 (7 303)          | 18.60 (71 516)        |

Table 2. Results from the Multilevel Analysis of Individual Heterogeneity and Discriminatory Accuracy (MAIHDA) distinguishing between measures of association (Odds Ratios) and measures of variance and discriminatory accuracy. The analyses are stratified by the existence of previous mental issues. Values are point estimations (with 95% credible intervals) or percentages where indicated.

|                                                          | Without metal health issues |                  | With mental health issues |                  |
|----------------------------------------------------------|-----------------------------|------------------|---------------------------|------------------|
|                                                          | Model 1                     | Model 2          | Model 1                   | Model 2          |
| <b>Measures of association</b>                           |                             |                  |                           |                  |
| Age                                                      |                             |                  |                           |                  |
| 12-17 years                                              |                             | Reference        |                           | Reference        |
| 18-23 years                                              |                             | 1.76 (1.35-2.21) |                           | 1.64 (1.42-1.89) |
| 24-30 years                                              |                             | 2.34 (1.79-2.90) |                           | 2.69 (2.32-3.09) |
| Income                                                   |                             |                  |                           |                  |
| High inc.                                                |                             | Reference        |                           | Reference        |
| Medium inc.                                              |                             | 1.06 (0.81-1.34) |                           | 0.84 (0.72-0.98) |
| Low inc.                                                 |                             | 1.08 (0.86-1.35) |                           | 0.87 (0.75-1.00) |
| Immigrant background                                     |                             |                  |                           |                  |
| None                                                     |                             | Reference        |                           | Reference        |
| Yes                                                      |                             | 0.63 (0.51-0.76) |                           | 0.52 (0.46-0.59) |
| Hormonal contraception                                   |                             |                  |                           |                  |
| No                                                       |                             | Reference        |                           | Reference        |
| Yes                                                      |                             | 1.86 (1.51-2.28) |                           | 1.18 (1.05-1.34) |
| <b>Measures of variance and discriminatory accuracy*</b> |                             |                  |                           |                  |
| Variance                                                 | 0.36 (0.22-0.60)            | 0.08 (0.04-0.15) | 0.31 (0.19-0.51)          | 0.02 (0.01-0.14) |
| VPC                                                      | 9.88%                       | 2.34%            | 8.67%                     | 0.63%            |
| PCV                                                      |                             | 76.32%           |                           | 92.73%           |
| AUC                                                      | 0.63 (0.63-0.63)            | 0.62 (0.62-0.62) | 0.65 (0.64-0.65)          | 0.64 (0.64-0.64) |

\*Between-strata variance, variance partition coefficient (VPC), proportional change of the variance (PCV), Area under the curve (AUC)

**Table 3.** Distribution of antidepressant use between different intersectional strata, and difference in usage between user and non-users of hormonal contraceptives but otherwise sharing the same intersectional stratum. The values are calculated from the multilevel analysis of individual heterogeneity and discriminatory accuracy (MAIHDA). Numbers are percentages.

| Previous mental health issues | Age (years) | Income level | Immigrant background | Number of women | Use of hormonal contraceptives (%) |      |                   |
|-------------------------------|-------------|--------------|----------------------|-----------------|------------------------------------|------|-------------------|
|                               |             |              |                      |                 | Yes                                | No   | Yes-No difference |
| No                            | 12 – 17     | Low          | No                   | 25342           | 3.7                                | 1.2  | 2.4 (1.9-3)       |
|                               |             |              | Yes                  | 7416            | 1.2                                | 0.4  | 0.7 (0.1-1.6)     |
|                               |             | Middle       | No                   | 69096           | 2.9                                | 1    | 1.9 (1.6-2.2)     |
|                               |             |              | Yes                  | 9839            | 2                                  | 0.6  | 1.4 (0.5-2.5)     |
|                               |             | High         | No                   | 115995          | 1.9                                | 0.9  | 1 (0.8-1.2)       |
|                               |             |              | Yes                  | 4396            | 2.5                                | 0.8  | 1.7 (0.6-3.2)     |
|                               | 18 – 23     | Low          | No                   | 15523           | 3.9                                | 2.7  | 1.2 (0.5-1.8)     |
|                               |             |              | Yes                  | 8238            | 2.2                                | 1.1  | 1 (0.2-2)         |
|                               |             | Middle       | No                   | 27757           | 2.9                                | 2.2  | 0.7 (0.3-1.1)     |
|                               |             |              | Yes                  | 6642            | 2.2                                | 1.1  | 1.1 (0.2-2.1)     |
|                               |             | High         | No                   | 47988           | 2.3                                | 2    | 0.3 (0-0.6)       |
|                               |             |              | Yes                  | 2585            | 2.5                                | 1.8  | 0.7 (-0.5-2.1)    |
|                               | 24 – 30     | Low          | No                   | 51819           | 4.2                                | 3.3  | 0.9 (0.4-1.3)     |
|                               |             |              | Yes                  | 29628           | 2.7                                | 1.3  | 1.4 (0.8-2.1)     |
|                               |             | Middle       | No                   | 22251           | 4.7                                | 2.8  | 1.9 (1.2-2.6)     |
|                               |             |              | Yes                  | 7675            | 2.8                                | 2.1  | 0.6 (-0.4-1.8)    |
|                               |             | High         | No                   | 18715           | 3.1                                | 2.6  | 0.6 (0-1.2)       |
|                               |             |              | Yes                  | 2400            | 2.9                                | 2.3  | 0.6 (-1-2.7)      |
| Yes                           | 12 – 17     | Low          | No                   | 2671            | 30.5                               | 21.8 | 8.6 (4.9-12.4)    |
|                               |             |              | Yes                  | 372             | 19.7                               | 12.6 | 7.1 (-1.3-16.6)   |
|                               |             | Middle       | No                   | 5554            | 31.6                               | 22.9 | 8.7 (6-11.5)      |
|                               |             |              | Yes                  | 507             | 17.3                               | 14.4 | 2.9 (-4.8-11.9)   |
|                               |             | High         | No                   | 6585            | 35.2                               | 27.9 | 7.3 (4.6-10)      |
|                               |             |              | Yes                  | 322             | 29.5                               | 19.6 | 9.9 (-0.5-21.1)   |
|                               | 18 – 23     | Low          | No                   | 4197            | 38.9                               | 39   | -0.1 (-3.5-3.4)   |
|                               |             |              | Yes                  | 666             | 29.2                               | 20.1 | 9.1 (0.7-17.9)    |
|                               |             | Middle       | No                   | 5049            | 38.2                               | 36.4 | 1.8 (-1.2-4.8)    |
|                               |             |              | Yes                  | 549             | 31.1                               | 18.6 | 12.5 (3.2-22.2)   |

|         |        |     |       |      |      |                 |
|---------|--------|-----|-------|------|------|-----------------|
|         | High   | No  | 6601  | 39.5 | 40.6 | -1.1 (-3.6-1.6) |
|         |        | Yes | 306   | 32.7 | 23.6 | 9.1 (-1.5-20.1) |
| 24 – 30 | Low    | No  | 14408 | 48.5 | 50.5 | -2 (-4.4-0.3)   |
|         |        | Yes | 2633  | 32.7 | 32.1 | 0.6 (-4.9-6.3)  |
|         | Middle | No  | 4486  | 49.5 | 50.8 | -1.3 (-5.3-2.7) |
|         |        | Yes | 777   | 34.4 | 36.5 | -2.1 (-11.7-8)  |
|         | High   | No  | 3237  | 46.3 | 49.3 | -3 (-7.6-1.7)   |
|         |        | Yes | 318   | 41.4 | 36.6 | 4.8 (-9-19.7)   |

For peer review only

## Supplementary material 8

**Sensitivity analysis only including women with a recent health care contact (defined as any dispensed prescription or appointment at a hospital in the last 3 years) = 60.46% of the original population**

**Table 1.** Characteristics of the 553 789 women aged 12 - 30 years and residing in Sweden by 1<sup>st</sup> January 2013 by previous mental health issues and use of hormonal contraceptives. Values are percentages (number of women) if not otherwise indicated.

|                      | Previous mental health issues  |                       |                                |                        |
|----------------------|--------------------------------|-----------------------|--------------------------------|------------------------|
|                      | Yes                            |                       | No                             |                        |
|                      | 19.01 (n = 105 283)            |                       | 80.99 (n = 448 506)            |                        |
|                      | Use of Hormonal contraceptives |                       | Use of Hormonal contraceptives |                        |
|                      | Yes                            | No                    | Yes                            | No                     |
|                      | 42.42<br>(n = 44657)           | 57.58<br>(n = 60 626) | 44.41<br>(n = 199 170)         | 55.59<br>(n = 249 336) |
| Antidepressant drugs | 41.17 (19 886)                 | 39.77 (26 013)        | 2.73 (9 215)                   | 1.87 (8 699)           |
| Age                  |                                |                       |                                |                        |
| 12-17 years          | 15.11 (6 747)                  | 20.75 (12 581)        | 15.63 (31 133)                 | 37.24 (92 846)         |
| 18-23 years          | 48.78 (21 784)                 | 31.29 (18 968)        | 48.30 (96 200)                 | 22.75 (56 735)         |
| 24-30 years          | 36.11 (16 126)                 | 47.96 (29 077)        | 36.07 (71 837)                 | 40.01 (99 755)         |
| Income level         |                                |                       |                                |                        |
| Low                  | 39.70 (17 731)                 | 45.01 (27 286)        | 33.06 (65 847)                 | 35.08 (87 456)         |
| Middle               | 27.55 (12 302)                 | 27.85 (16 887)        | 26.00 (51 776)                 | 29.91 (74 575)         |
| High                 | 32.75 (14 624)                 | 27.14 (16 453)        | 40.94 (81 547)                 | 35.01 (87 305)         |
| Immigrant background |                                |                       |                                |                        |
| No                   | 94.50 (42 200)                 | 88.94 (53 919)        | 93.76 (186 745)                | 83.61 (208 465)        |
| Yes                  | 5.50 (2 457)                   | 11.06 (6 707)         | 6.24 (12 425)                  | 16.39 (40 871)         |

**Table 2.** Results from the Multilevel Analysis of Individual Heterogeneity and Discriminatory Accuracy (MAIHDA) distinguishing between measures of association and measures of variance and discriminatory accuracy. The analyses are stratified by the existence of previous mental issues. Values are point estimations with (95% Confidence Intervals)

|                                      | Without metal health issues |                     | With mental health issues |                     |
|--------------------------------------|-----------------------------|---------------------|---------------------------|---------------------|
|                                      | Model 1                     | Model 2             | Model 1                   | Model 2             |
| <b>Measures of association, Odds</b> |                             |                     |                           |                     |
| Ratios                               |                             |                     |                           |                     |
| Age                                  |                             |                     |                           |                     |
| 12-17                                |                             | Reference           |                           | Reference           |
| 18-23                                |                             | 1.73 (1.33-2.22)    |                           | 1.52 (1.33-1.71)    |
| 24-30                                |                             | 1.90 (1.48-2.40)    |                           | 2.58 (2.29-2.91)    |
| Income                               |                             |                     |                           |                     |
| High                                 |                             | Reference           |                           | Reference           |
| Middle                               |                             | 1.16 (0.91-1.48)    |                           | 0.89 (0.79-1.01)    |
| Low                                  |                             | 1.17 (0.92-1.55)    |                           | 0.89 (0.78-1.01)    |
| Immigrant background                 |                             |                     |                           |                     |
| No                                   |                             | Reference           |                           | Reference           |
| Yes                                  |                             | 0.65 (0.53-0.81)    |                           | 0.55 (0.49-0.61)    |
| Hormonal contraceptives              |                             |                     |                           |                     |
| No                                   |                             | Reference           |                           | Reference           |
| Yes                                  |                             | 1.40 (1.12-1.71)    |                           | 1.18 (1.06-1.34)    |
| <b>Measures of variance</b>          |                             |                     |                           |                     |
| Variance*                            | 0.224 (0.130-0.372)         | 0.077 (0.038-0.141) | 0.287 (0.174-0.468)       | 0.017 (0.008-0.033) |
| VPC                                  | 6.38%                       | 2.29%               | 8.02%                     | 0.51%               |
| PCV                                  |                             | 65.67%              |                           | 94.09%              |
| AUC                                  | 0.61 (0.61-0.61)            | 0.61 (0.61-0.61)    | 0.64 (0.64-0.64)          | 0.64 (0.64-0.64)    |

\*Between-strata variance, variance partition coefficient (VPC), proportional change of the variance (PCV), Area under the curve (AUC)



**Table 3.** Absolute risk (AR) of antidepressant use, and AR difference (ARD) between user and non-users of hormonal contraceptives but otherwise sharing the same intersectional stratum. The values are calculated from the multilevel analysis of individual heterogeneity and discriminatory accuracy (MAIHDA)

| Previous mental health issues | Age (years) | Income level | Immigrant background | Number of women | Use of hormonal contraceptive |                   |                       |      |                  |
|-------------------------------|-------------|--------------|----------------------|-----------------|-------------------------------|-------------------|-----------------------|------|------------------|
|                               |             |              |                      |                 | Yes AR                        | No AR             | Yes-No difference ARD |      |                  |
| No                            | 12 – 17     | Low          | No                   | 14060           | 4.4                           | 1.8               | 2.7 (2 - 3.4)         |      |                  |
|                               |             |              | Yes                  | 3123            | 1.5                           | 0.8               | 0.8 (-0.1 - 2)        |      |                  |
|                               |             | Middle       | No                   | 37376           | 3.6                           | 1.3               | 2.2 (1.8 - 2.6)       |      |                  |
|                               |             |              | Yes                  | 4543            | 2.4                           | 1.0               | 1.4 (0.3 - 2.8)       |      |                  |
|                               | High        | No           | 62712                | 2.4             | 1.1                           | 1.3 (1 - 1.5)     |                       |      |                  |
|                               |             | Yes          | 2165                 | 2.8             | 1.2                           | 1.7 (0.4 - 3.3)   |                       |      |                  |
|                               |             | Low          | No                   | 25939           | 4.2                           | 3.4               | 0.8 (0.3 - 1.2)       |      |                  |
|                               |             |              | Yes                  | 5720            | 2.5                           | 2.0               | 0.5 (-0.3 - 1.4)      |      |                  |
|                               | Middle      | No           | 40241                | 3.3             | 3.6                           | -0.3 (-0.6 - 0.1) |                       |      |                  |
|                               |             | Yes          | 4547                 | 2.7             | 1.8                           | 0.9 (0 - 1.9)     |                       |      |                  |
|                               |             | High         | No                   | 74281           | 2.7                           | 2.9               | -0.2 (-0.4 - 0.1)     |      |                  |
|                               |             |              | Yes                  | 2207            | 2.0                           | 2.7               | -0.6 (-1.9 - 0.5)     |      |                  |
|                               | 24 – 30     | Low          | No                   | 83448           | 3.6                           | 3.7               | 0 (-0.3 - 0.2)        |      |                  |
|                               |             |              | Yes                  | 21013           | 2.9                           | 2.1               | 0.8 (0.3 - 1.4)       |      |                  |
|                               |             | Middle       | No                   | 31818           | 4.0                           | 3.5               | 0.5 (0.1 - 0.9)       |      |                  |
|                               |             |              | Yes                  | 7826            | 3.0                           | 2.7               | 0.3 (-0.5 - 1.2)      |      |                  |
|                               |             | High         | No                   | 25335           | 2.9                           | 3.0               | -0.1 (-0.5 - 0.3)     |      |                  |
|                               |             |              | Yes                  | 2152            | 2.5                           | 2.7               | -0.2 (-1.5 - 1.2)     |      |                  |
|                               |             | Yes          | 12 – 17              | Low             | No                            | 3371              | 30.1                  | 22.3 | 7.8 (4.7 - 10.9) |
|                               |             |              |                      |                 | Yes                           | 429               | 20.4                  | 13.4 | 7 (-0.4 - 14.8)  |
| Middle                        | No          |              |                      | 6787            | 31.0                          | 23.1              | 7.9 (5.7 - 10.1)      |      |                  |
|                               | Yes         |              |                      | 565             | 19.5                          | 14.3              | 5.2 (-1.5 - 12.7)     |      |                  |
| High                          | No          |              | 7807                 | 33.8            | 27.7                          | 6.1 (3.9 - 8.2)   |                       |      |                  |
|                               | Yes         |              | 369                  | 29.7            | 19.4                          | 10.3 (1.2 - 19.6) |                       |      |                  |
|                               | Low         |              | No                   | 10205           | 38.8                          | 36.9              | 1.9 (0.1 - 3.8)       |      |                  |
|                               |             |              | Yes                  | 1068            | 28.1                          | 19.0              | 9.1 (3.5 - 14.6)      |      |                  |
| Middle                        | No          |              | 12082                | 36.6            | 35.0                          | 1.6 (-0.1 - 3.3)  |                       |      |                  |
|                               | Yes         |              | 805                  | 27.2            | 19.1                          | 8.1 (2 - 14.3)    |                       |      |                  |
|                               | High        |              | No                   | 15994           | 37.2                          | 38.5              | -1.3 (-2.8 - 0.3)     |      |                  |
|                               |             |              | Yes                  | 598             | 26.3                          | 25.4              | 0.8 (-6.1 - 7.7)      |      |                  |
| 24 – 30                       | Low         |              | No                   | 26185           | 49.2                          | 48.9              | 0.3 (-0.9 - 1.6)      |      |                  |
|                               |             |              | Yes                  | 3759            | 36.0                          | 32.6              | 3.4 (-0.3 - 7)        |      |                  |
|                               | Middle      |              | No                   | 7820            | 49.2                          | 50.4              | -1.3 (-3.6 - 1)       |      |                  |
|                               |             |              | Yes                  | 1130            | 31.4                          | 37.2              | -5.8 (-12.4 - 0.9)    |      |                  |

|    |  |      |     |      |      |      |                 |
|----|--|------|-----|------|------|------|-----------------|
| 1  |  |      |     |      |      |      |                 |
| 2  |  |      |     |      |      |      |                 |
| 3  |  | High | No  | 5868 | 47.8 | 47.8 | 0 (-2.6 - 2.6)  |
| 4  |  |      | Yes | 441  | 41.3 | 35.2 | 6.1 (-3.6 - 16) |
| 5  |  |      |     |      |      |      |                 |
| 6  |  |      |     |      |      |      |                 |
| 7  |  |      |     |      |      |      |                 |
| 8  |  |      |     |      |      |      |                 |
| 9  |  |      |     |      |      |      |                 |
| 10 |  |      |     |      |      |      |                 |
| 11 |  |      |     |      |      |      |                 |
| 12 |  |      |     |      |      |      |                 |
| 13 |  |      |     |      |      |      |                 |
| 14 |  |      |     |      |      |      |                 |
| 15 |  |      |     |      |      |      |                 |
| 16 |  |      |     |      |      |      |                 |
| 17 |  |      |     |      |      |      |                 |
| 18 |  |      |     |      |      |      |                 |
| 19 |  |      |     |      |      |      |                 |
| 20 |  |      |     |      |      |      |                 |
| 21 |  |      |     |      |      |      |                 |
| 22 |  |      |     |      |      |      |                 |
| 23 |  |      |     |      |      |      |                 |
| 24 |  |      |     |      |      |      |                 |
| 25 |  |      |     |      |      |      |                 |
| 26 |  |      |     |      |      |      |                 |
| 27 |  |      |     |      |      |      |                 |
| 28 |  |      |     |      |      |      |                 |
| 29 |  |      |     |      |      |      |                 |
| 30 |  |      |     |      |      |      |                 |
| 31 |  |      |     |      |      |      |                 |
| 32 |  |      |     |      |      |      |                 |
| 33 |  |      |     |      |      |      |                 |
| 34 |  |      |     |      |      |      |                 |
| 35 |  |      |     |      |      |      |                 |
| 36 |  |      |     |      |      |      |                 |
| 37 |  |      |     |      |      |      |                 |
| 38 |  |      |     |      |      |      |                 |
| 39 |  |      |     |      |      |      |                 |
| 40 |  |      |     |      |      |      |                 |
| 41 |  |      |     |      |      |      |                 |
| 42 |  |      |     |      |      |      |                 |
| 43 |  |      |     |      |      |      |                 |
| 44 |  |      |     |      |      |      |                 |
| 45 |  |      |     |      |      |      |                 |
| 46 |  |      |     |      |      |      |                 |
| 47 |  |      |     |      |      |      |                 |
| 48 |  |      |     |      |      |      |                 |
| 49 |  |      |     |      |      |      |                 |
| 50 |  |      |     |      |      |      |                 |
| 51 |  |      |     |      |      |      |                 |
| 52 |  |      |     |      |      |      |                 |
| 53 |  |      |     |      |      |      |                 |
| 54 |  |      |     |      |      |      |                 |
| 55 |  |      |     |      |      |      |                 |
| 56 |  |      |     |      |      |      |                 |
| 57 |  |      |     |      |      |      |                 |
| 58 |  |      |     |      |      |      |                 |
| 59 |  |      |     |      |      |      |                 |
| 60 |  |      |     |      |      |      |                 |

For peer review only

# Reporting checklist for cohort study.

Based on the STROBE cohort guidelines.

## Instructions to authors

Complete this checklist by entering the page numbers from your manuscript where readers will find each of the items listed below.

Your article may not currently address all the items on the checklist. Please modify your text to include the missing information. If you are certain that an item does not apply, please write "n/a" and provide a short explanation.

Upload your completed checklist as an extra file when you submit to a journal.

In your methods section, say that you used the STROBE cohort reporting guidelines, and cite them as:

von Elm E, Altman DG, Egger M, Pocock SJ, Gotsche PC, Vandembroucke JP. The Strengthening the Reporting of Observational Studies in Epidemiology (STROBE) Statement: guidelines for reporting observational studies.

|                           |                     | Reporting Item                                                                                  | Page Number |
|---------------------------|---------------------|-------------------------------------------------------------------------------------------------|-------------|
| <b>Title and abstract</b> |                     |                                                                                                 |             |
| Title                     | <a href="#">#1a</a> | Indicate the study's design with a commonly used term in the title or the abstract              | 1           |
| Abstract                  | <a href="#">#1b</a> | Provide in the abstract an informative and balanced summary of what was done and what was found | 2           |
| <b>Introduction</b>       |                     |                                                                                                 |             |
| Background / rationale    | <a href="#">#2</a>  | Explain the scientific background and rationale for the investigation being reported            | 4-5         |
| Objectives                | <a href="#">#3</a>  | State specific objectives, including any prespecified hypotheses                                | 5           |
| <b>Methods</b>            |                     |                                                                                                 |             |
| Study design              | <a href="#">#4</a>  | Present key elements of study design early in the paper                                         | 5           |

|    |                            |                      |                                                                                                                                                                                                                                                                      |                            |
|----|----------------------------|----------------------|----------------------------------------------------------------------------------------------------------------------------------------------------------------------------------------------------------------------------------------------------------------------|----------------------------|
| 1  | Setting                    | <a href="#">#5</a>   | Describe the setting, locations, and relevant dates, including periods of recruitment, exposure, follow-up, and data collection                                                                                                                                      | 5-6                        |
| 2  |                            |                      |                                                                                                                                                                                                                                                                      |                            |
| 3  |                            |                      |                                                                                                                                                                                                                                                                      |                            |
| 4  |                            |                      |                                                                                                                                                                                                                                                                      |                            |
| 5  |                            |                      |                                                                                                                                                                                                                                                                      |                            |
| 6  | Eligibility criteria       | <a href="#">#6a</a>  | Give the eligibility criteria, and the sources and methods of selection of participants. Describe methods of follow-up.                                                                                                                                              | 5-6                        |
| 7  |                            |                      |                                                                                                                                                                                                                                                                      |                            |
| 8  |                            |                      |                                                                                                                                                                                                                                                                      |                            |
| 9  |                            |                      |                                                                                                                                                                                                                                                                      |                            |
| 10 |                            |                      |                                                                                                                                                                                                                                                                      |                            |
| 11 | Eligibility criteria       | <a href="#">#6b</a>  | For matched studies, give matching criteria and number of exposed and unexposed                                                                                                                                                                                      | 5-6                        |
| 12 |                            |                      |                                                                                                                                                                                                                                                                      |                            |
| 13 |                            |                      |                                                                                                                                                                                                                                                                      |                            |
| 14 |                            |                      |                                                                                                                                                                                                                                                                      |                            |
| 15 | Variables                  | <a href="#">#7</a>   | Clearly define all outcomes, exposures, predictors, potential confounders, and effect modifiers. Give diagnostic criteria, if applicable                                                                                                                             | 6-7                        |
| 16 |                            |                      |                                                                                                                                                                                                                                                                      |                            |
| 17 |                            |                      |                                                                                                                                                                                                                                                                      |                            |
| 18 |                            |                      |                                                                                                                                                                                                                                                                      |                            |
| 19 |                            |                      |                                                                                                                                                                                                                                                                      |                            |
| 20 |                            |                      |                                                                                                                                                                                                                                                                      |                            |
| 21 | Data sources / measurement | <a href="#">#8</a>   | For each variable of interest give sources of data and details of methods of assessment (measurement). Describe comparability of assessment methods if there is more than one group. Give information separately for for exposed and unexposed groups if applicable. | 6-7                        |
| 22 |                            |                      |                                                                                                                                                                                                                                                                      |                            |
| 23 |                            |                      |                                                                                                                                                                                                                                                                      |                            |
| 24 |                            |                      |                                                                                                                                                                                                                                                                      |                            |
| 25 |                            |                      |                                                                                                                                                                                                                                                                      |                            |
| 26 |                            |                      |                                                                                                                                                                                                                                                                      |                            |
| 27 |                            |                      |                                                                                                                                                                                                                                                                      |                            |
| 28 |                            |                      |                                                                                                                                                                                                                                                                      |                            |
| 29 |                            |                      |                                                                                                                                                                                                                                                                      |                            |
| 30 | Bias                       | <a href="#">#9</a>   | Describe any efforts to address potential sources of bias                                                                                                                                                                                                            | 6-7                        |
| 31 |                            |                      |                                                                                                                                                                                                                                                                      |                            |
| 32 |                            |                      |                                                                                                                                                                                                                                                                      |                            |
| 33 |                            |                      |                                                                                                                                                                                                                                                                      |                            |
| 34 | Study size                 | <a href="#">#10</a>  | Explain how the study size was arrived at                                                                                                                                                                                                                            | 5-6                        |
| 35 |                            |                      |                                                                                                                                                                                                                                                                      |                            |
| 36 |                            |                      |                                                                                                                                                                                                                                                                      |                            |
| 37 | Quantitative variables     | <a href="#">#11</a>  | Explain how quantitative variables were handled in the analyses. If applicable, describe which groupings were chosen, and why                                                                                                                                        | 7-8                        |
| 38 |                            |                      |                                                                                                                                                                                                                                                                      |                            |
| 39 |                            |                      |                                                                                                                                                                                                                                                                      |                            |
| 40 |                            |                      |                                                                                                                                                                                                                                                                      |                            |
| 41 |                            |                      |                                                                                                                                                                                                                                                                      |                            |
| 42 | Statistical methods        | <a href="#">#12a</a> | Describe all statistical methods, including those used to control for confounding                                                                                                                                                                                    |                            |
| 43 |                            |                      |                                                                                                                                                                                                                                                                      |                            |
| 44 |                            |                      |                                                                                                                                                                                                                                                                      |                            |
| 45 |                            |                      |                                                                                                                                                                                                                                                                      |                            |
| 46 | 6-7                        |                      |                                                                                                                                                                                                                                                                      |                            |
| 47 |                            |                      |                                                                                                                                                                                                                                                                      |                            |
| 48 | Statistical methods        | <a href="#">#12b</a> | Describe any methods used to examine subgroups and interactions                                                                                                                                                                                                      | 7-8                        |
| 49 |                            |                      |                                                                                                                                                                                                                                                                      |                            |
| 50 |                            |                      |                                                                                                                                                                                                                                                                      |                            |
| 51 |                            |                      |                                                                                                                                                                                                                                                                      |                            |
| 52 | Statistical methods        | <a href="#">#12c</a> | Explain how missing data were addressed                                                                                                                                                                                                                              | 7-8                        |
| 53 |                            |                      |                                                                                                                                                                                                                                                                      |                            |
| 54 | Statistical methods        | <a href="#">#12d</a> | If applicable, explain how loss to follow-up was addressed                                                                                                                                                                                                           | n/a Follow-up was complete |
| 55 |                            |                      |                                                                                                                                                                                                                                                                      |                            |
| 56 |                            |                      |                                                                                                                                                                                                                                                                      |                            |
| 57 |                            |                      |                                                                                                                                                                                                                                                                      |                            |
| 58 |                            |                      |                                                                                                                                                                                                                                                                      |                            |
| 59 |                            |                      |                                                                                                                                                                                                                                                                      |                            |
| 60 |                            |                      |                                                                                                                                                                                                                                                                      |                            |

for the final  
cohort1  
2  
3  
4  
5  
6  
7  
8  
9  
10  
11  
12  
13  
14  
15  
16  
17  
18  
19  
20  
21  
22  
23  
24  
25  
26  
27  
28  
29  
30  
31  
32  
33  
34  
35  
36  
37  
38  
39  
40  
41  
42  
43  
44  
45  
46  
47  
48  
49  
50  
51  
52  
53  
54  
55  
56  
57  
58  
59  
60

|                                                                   |                      |                                                                                                                                                                                                                                                                                |            |
|-------------------------------------------------------------------|----------------------|--------------------------------------------------------------------------------------------------------------------------------------------------------------------------------------------------------------------------------------------------------------------------------|------------|
| Statistical methods                                               | <a href="#">#12e</a> | Describe any sensitivity analyses                                                                                                                                                                                                                                              |            |
| 14-15                                                             |                      |                                                                                                                                                                                                                                                                                |            |
| <b>Results</b>                                                    |                      |                                                                                                                                                                                                                                                                                |            |
| Participants                                                      | <a href="#">#13a</a> | Report numbers of individuals at each stage of study—eg numbers potentially eligible, examined for eligibility, confirmed eligible, included in the study, completing follow-up, and analysed. Give information separately for for exposed and unexposed groups if applicable. | 5-6        |
| Participants                                                      | <a href="#">#13b</a> | Give reasons for non-participation at each stage                                                                                                                                                                                                                               | 5-6        |
| Participants                                                      | <a href="#">#13c</a> | Consider use of a flow diagram                                                                                                                                                                                                                                                 |            |
| Figure 1                                                          |                      |                                                                                                                                                                                                                                                                                |            |
| Descriptive data                                                  | <a href="#">#14a</a> | Give characteristics of study participants (eg demographic, clinical, social) and information on exposures and potential confounders. Give information separately for exposed and unexposed groups if applicable.                                                              | 9, table 1 |
| Descriptive data                                                  | <a href="#">#14b</a> | Indicate number of participants with missing data for each variable of interest                                                                                                                                                                                                |            |
| n/a All participants included in final analysis had complete data |                      |                                                                                                                                                                                                                                                                                |            |
| Descriptive data                                                  | <a href="#">#14c</a> | Summarise follow-up time (eg, average and total amount)                                                                                                                                                                                                                        |            |
| 5-6                                                               |                      |                                                                                                                                                                                                                                                                                |            |
| Outcome data                                                      | <a href="#">#15</a>  | Report numbers of outcome events or summary measures over time. Give information separately for exposed and unexposed groups if applicable.                                                                                                                                    |            |
| 9-10                                                              |                      |                                                                                                                                                                                                                                                                                |            |

|    |                          |                      |                                                                                                                                                                                                          |       |
|----|--------------------------|----------------------|----------------------------------------------------------------------------------------------------------------------------------------------------------------------------------------------------------|-------|
| 1  | Main results             | <a href="#">#16a</a> | Give unadjusted estimates and, if applicable, confounder-adjusted estimates and their precision (eg, 95% confidence interval). Make clear which confounders were adjusted for and why they were included | 10-11 |
| 2  |                          |                      |                                                                                                                                                                                                          |       |
| 3  |                          |                      |                                                                                                                                                                                                          |       |
| 4  |                          |                      |                                                                                                                                                                                                          |       |
| 5  |                          |                      |                                                                                                                                                                                                          |       |
| 6  |                          |                      |                                                                                                                                                                                                          |       |
| 7  |                          |                      |                                                                                                                                                                                                          |       |
| 8  |                          |                      |                                                                                                                                                                                                          |       |
| 9  | Main results             | <a href="#">#16b</a> | Report category boundaries when continuous variables were categorized                                                                                                                                    | 11-12 |
| 10 |                          |                      |                                                                                                                                                                                                          |       |
| 11 |                          |                      |                                                                                                                                                                                                          |       |
| 12 |                          |                      |                                                                                                                                                                                                          |       |
| 13 | Main results             | <a href="#">#16c</a> | If relevant, consider translating estimates of relative risk into absolute risk for a meaningful time period                                                                                             |       |
| 14 |                          |                      |                                                                                                                                                                                                          |       |
| 15 |                          |                      |                                                                                                                                                                                                          |       |
| 16 |                          |                      |                                                                                                                                                                                                          |       |
| 17 | 10-12                    |                      |                                                                                                                                                                                                          |       |
| 18 |                          |                      |                                                                                                                                                                                                          |       |
| 19 | Other analyses           | <a href="#">#17</a>  | Report other analyses done—eg analyses of subgroups and interactions, and sensitivity analyses                                                                                                           | 11-13 |
| 20 |                          |                      |                                                                                                                                                                                                          |       |
| 21 |                          |                      |                                                                                                                                                                                                          |       |
| 22 |                          |                      |                                                                                                                                                                                                          |       |
| 23 |                          |                      |                                                                                                                                                                                                          |       |
| 24 | <b>Discussion</b>        |                      |                                                                                                                                                                                                          |       |
| 25 |                          |                      |                                                                                                                                                                                                          |       |
| 26 |                          |                      |                                                                                                                                                                                                          |       |
| 27 | Key results              | <a href="#">#18</a>  | Summarise key results with reference to study objectives                                                                                                                                                 | 13-14 |
| 28 |                          |                      |                                                                                                                                                                                                          |       |
| 29 |                          |                      |                                                                                                                                                                                                          |       |
| 30 |                          |                      |                                                                                                                                                                                                          |       |
| 31 | Limitations              | <a href="#">#19</a>  | Discuss limitations of the study, taking into account sources of potential bias or imprecision. Discuss both direction and magnitude of any potential bias.                                              | 15-16 |
| 32 |                          |                      |                                                                                                                                                                                                          |       |
| 33 |                          |                      |                                                                                                                                                                                                          |       |
| 34 |                          |                      |                                                                                                                                                                                                          |       |
| 35 |                          |                      |                                                                                                                                                                                                          |       |
| 36 | Interpretation           | <a href="#">#20</a>  | Give a cautious overall interpretation considering objectives, limitations, multiplicity of analyses, results from similar studies, and other relevant evidence.                                         | 16    |
| 37 |                          |                      |                                                                                                                                                                                                          |       |
| 38 |                          |                      |                                                                                                                                                                                                          |       |
| 39 |                          |                      |                                                                                                                                                                                                          |       |
| 40 |                          |                      |                                                                                                                                                                                                          |       |
| 41 |                          |                      |                                                                                                                                                                                                          |       |
| 42 |                          |                      |                                                                                                                                                                                                          |       |
| 43 | Generalisability         | <a href="#">#21</a>  | Discuss the generalisability (external validity) of the study results                                                                                                                                    | 16    |
| 44 |                          |                      |                                                                                                                                                                                                          |       |
| 45 |                          |                      |                                                                                                                                                                                                          |       |
| 46 |                          |                      |                                                                                                                                                                                                          |       |
| 47 | <b>Other Information</b> |                      |                                                                                                                                                                                                          |       |
| 48 |                          |                      |                                                                                                                                                                                                          |       |
| 49 | Funding                  | <a href="#">#22</a>  | Give the source of funding and the role of the funders for the present study and, if applicable, for the original study on which the present article is based                                            | 17    |
| 50 |                          |                      |                                                                                                                                                                                                          |       |
| 51 |                          |                      |                                                                                                                                                                                                          |       |
| 52 |                          |                      |                                                                                                                                                                                                          |       |
| 53 |                          |                      |                                                                                                                                                                                                          |       |
| 54 |                          |                      |                                                                                                                                                                                                          |       |
| 55 |                          |                      |                                                                                                                                                                                                          |       |

## Notes:

- 12d: n/a Follow-up was complete for the final cohort

- 1 • 14b: n/a All participants included in final analysis had complete data The STROBE checklist is  
2 distributed under the terms of the Creative Commons Attribution License CC-BY. This checklist  
3 was completed on 26. January 2021 using <https://www.goodreports.org/>, a tool made by the  
4 [EQUATOR Network](#) in collaboration with [Penelope.ai](#)  
5  
6  
7  
8  
9  
10  
11  
12  
13  
14  
15  
16  
17  
18  
19  
20  
21  
22  
23  
24  
25  
26  
27  
28  
29  
30  
31  
32  
33  
34  
35  
36  
37  
38  
39  
40  
41  
42  
43  
44  
45  
46  
47  
48  
49  
50  
51  
52  
53  
54  
55  
56  
57  
58  
59  
60

For peer review only
