# Supplementary material for: Population heterogeneity in associations between hormonal contraception and antidepressant use in Sweden: a prospective cohort study applying intersectional multilevel analysis of individual heterogeneity and discriminatory accuracy (MAIHDA)
Source: PubMed Central journal article supplement (PMC8488727; doi:10.1136/bmjopen-2021-049553), 2021-10-01
Supplement: bmjopen-2021-049553supp005.pdf [file bmjopen-2021-049553supp005.pdf]

## Supplementary material 5

Supplementary table, summary statistics. Numbers are percentages (numbers within brackets).

|                                 |        | Hormonal<br>contraception | Mental health issues |
|---------------------------------|--------|---------------------------|----------------------|
| <i>Age</i>                      | 12-17  | 23.2 (63 181)             | 7.2 (19 536)         |
|                                 | 18-23  | 59.9 (192 315)            | 13.6 (43 729)        |
|                                 | 24-30  | 40.3 (130 103)            | 15.6 (50 447)        |
| <i>Income</i>                   | Low    | 40.8 (126 632)            | 15.9 (49 316)        |
|                                 | Middle | 38.9 (98 698)             | 12.2 (31 032)        |
|                                 | High   | 45.6 (160 269)            | 9.5 (33 363)         |
| <i>Immigrant<br/>background</i> | No     | 45.1 (363 390)            | 12.9 (103 938)       |
|                                 | Yes    | 20.1 (22 209)             | 8.9 (9 773)          |

**Supplementary table.** Percentage of women within each intersectional dimension using hormonal contraceptives and with previous mental health issues.
