# Supplementary material for: Population heterogeneity in associations between hormonal contraception and antidepressant use in Sweden: a prospective cohort study applying intersectional multilevel analysis of individual heterogeneity and discriminatory accuracy (MAIHDA)
Source: PubMed Central journal article supplement (PMC8488727; doi:10.1136/bmjopen-2021-049553), 2021-10-01
Supplement: bmjopen-2021-049553supp006.pdf [file bmjopen-2021-049553supp006.pdf]

## Supplementary material 6

| ATC     | Freq.   | Percent |
|---------|---------|---------|
| G02BA03 | 12 535  | 3.25    |
| G02BB   | 96      | 0.02    |
| G0BB01  | 26 022  | 6.75    |
| G02BB01 | 48      | 0.01    |
| G03AA03 | 4 786   | 1.24    |
| G03AA07 | 126 061 | 32.69   |
| G03AA09 | 3 227   | 0.84    |
| G03AA11 | 15 463  | 4.01    |
| G03AA12 | 4 596   | 13.69   |
| G03AA13 | 12 329  | 1.19    |
| G03AA14 | 5 958   | 3.20    |
| G03AB   | 5 958   | 1.55    |
| G03AB03 | 8 014   | 2.08    |
| G03AB04 | 5 341   | 1.39    |
| G03AC01 | 4 249   | 1.10    |
| G03AC02 | 2 483   | 0.64    |
| G03AC06 | 2 710   | 0.70    |
| G03AC08 | 21 284  | 5.52    |
| G03AC09 | 77 595  | 20.12   |

**Supplementary table, frequency table of hormonal contraceptives.** Frequency of all included hormonal contraceptives in the final cohort of 915 954 women.
