# Supplementary material for: Population heterogeneity in associations between hormonal contraception and antidepressant use in Sweden: a prospective cohort study applying intersectional multilevel analysis of individual heterogeneity and discriminatory accuracy (MAIHDA)
Source: PubMed Central journal article supplement (PMC8488727; doi:10.1136/bmjopen-2021-049553), 2021-10-01
Supplement: bmjopen-2021-049553supp008.pdf [file bmjopen-2021-049553supp008.pdf]

## Supplementary material 8

**Sensitivity analysis only including women with a recent health care contact (defined as any dispensed prescription or appointment at a hospital in the last 3 years) = 60.46% of the original population**

**Table 1.** Characteristics of the 553 789 women aged 12 - 30 years and residing in Sweden by 1<sup>st</sup> January 2013 by previous mental health issues and use of hormonal contraceptives. Values are percentages (number of women) if not otherwise indicated.

|                      | Previous mental health issues  |                       |                                |                        |
|----------------------|--------------------------------|-----------------------|--------------------------------|------------------------|
|                      | Yes                            |                       | No                             |                        |
|                      | 19.01 (n = 105 283)            |                       | 80.99 (n = 448 506)            |                        |
|                      | Use of Hormonal contraceptives |                       | Use of Hormonal contraceptives |                        |
|                      | Yes                            | No                    | Yes                            | No                     |
|                      | 42.42<br>(n = 44657)           | 57.58<br>(n = 60 626) | 44.41<br>(n = 199 170)         | 55.59<br>(n = 249 336) |
| Antidepressant drugs | 41.17 (19 886)                 | 39.77 (26 013)        | 2.73 (9 215)                   | 1.87 (8 699)           |
| Age                  |                                |                       |                                |                        |
| 12-17 years          | 15.11 (6 747)                  | 20.75 (12 581)        | 15.63 (31 133)                 | 37.24 (92 846)         |
| 18-23 years          | 48.78 (21 784)                 | 31.29 (18 968)        | 48.30 (96 200)                 | 22.75 (56 735)         |
| 24-30 years          | 36.11 (16 126)                 | 47.96 (29 077)        | 36.07 (71 837)                 | 40.01 (99 755)         |
| Income level         |                                |                       |                                |                        |
| Low                  | 39.70 (17 731)                 | 45.01 (27 286)        | 33.06 (65 847)                 | 35.08 (87 456)         |
| Middle               | 27.55 (12 302)                 | 27.85 (16 887)        | 26.00 (51 776)                 | 29.91 (74 575)         |
| High                 | 32.75 (14 624)                 | 27.14 (16 453)        | 40.94 (81 547)                 | 35.01 (87 305)         |
| Immigrant background |                                |                       |                                |                        |
| No                   | 94.50 (42 200)                 | 88.94 (53 919)        | 93.76 (186 745)                | 83.61 (208 465)        |
| Yes                  | 5.50 (2 457)                   | 11.06 (6 707)         | 6.24 (12 425)                  | 16.39 (40 871)         |

**Table 2.** Results from the Multilevel Analysis of Individual Heterogeneity and Discriminatory Accuracy (MAIHDA) distinguishing between measures of association and measures of variance and discriminatory accuracy. The analyses are stratified by the existence of previous mental issues. Values are point estimations with (95% Confidence Intervals)

|                                      | Without mental health issues |                     | With mental health issues |                     |
|--------------------------------------|------------------------------|---------------------|---------------------------|---------------------|
|                                      | Model 1                      | Model 2             | Model 1                   | Model 2             |
| <b>Measures of association, Odds</b> |                              |                     |                           |                     |
| Ratios                               |                              |                     |                           |                     |
| Age                                  |                              |                     |                           |                     |
| 12-17                                |                              | Reference           |                           | Reference           |
| 18-23                                |                              | 1.73 (1.33-2.22)    |                           | 1.52 (1.33-1.71)    |
| 24-30                                |                              | 1.90 (1.48-2.40)    |                           | 2.58 (2.29-2.91)    |
| Income                               |                              |                     |                           |                     |
| High                                 |                              | Reference           |                           | Reference           |
| Middle                               |                              | 1.16 (0.91-1.48)    |                           | 0.89 (0.79-1.01)    |
| Low                                  |                              | 1.17 (0.92-1.55)    |                           | 0.89 (0.78-1.01)    |
| Immigrant background                 |                              |                     |                           |                     |
| No                                   |                              | Reference           |                           | Reference           |
| Yes                                  |                              | 0.65 (0.53-0.81)    |                           | 0.55 (0.49-0.61)    |
| Hormonal contraceptives              |                              |                     |                           |                     |
| No                                   |                              | Reference           |                           | Reference           |
| Yes                                  |                              | 1.40 (1.12-1.71)    |                           | 1.18 (1.06-1.34)    |
| <b>Measures of variance</b>          |                              |                     |                           |                     |
| Variance*                            | 0.224 (0.130-0.372)          | 0.077 (0.038-0.141) | 0.287 (0.174-0.468)       | 0.017 (0.008-0.033) |
| VPC                                  | 6.38%                        | 2.29%               | 8.02%                     | 0.51%               |
| PCV                                  |                              | 65.67%              |                           | 94.09%              |
| AUC                                  | 0.61 (0.61-0.61)             | 0.61 (0.61-0.61)    | 0.64 (0.64-0.64)          | 0.64 (0.64-0.64)    |

\*Between-strata variance, variance partition coefficient (VPC), proportional change of the variance (PCV), Area under the curve (AUC)

**Table 3.** Absolute risk (AR) of antidepressant use, and AR difference (ARD) between user and non-users of hormonal contraceptives but otherwise sharing the same intersectional stratum. The values are calculated from the multilevel analysis of individual heterogeneity and discriminatory accuracy (MAIHDA)

| Previous mental health issues | Age (years) | Income level | Immigrant background | Number of women | Use of hormonal contraceptive |                    |                       |                  |
|-------------------------------|-------------|--------------|----------------------|-----------------|-------------------------------|--------------------|-----------------------|------------------|
|                               |             |              |                      |                 | Yes AR                        | No AR              | Yes-No difference ARD |                  |
| No                            | 12 – 17     | Low          | No                   | 14060           | 4.4                           | 1.8                | 2.7 (2 - 3.4)         |                  |
|                               |             |              | Yes                  | 3123            | 1.5                           | 0.8                | 0.8 (-0.1 - 2)        |                  |
|                               |             | Middle       | No                   | 37376           | 3.6                           | 1.3                | 2.2 (1.8 - 2.6)       |                  |
|                               |             |              | Yes                  | 4543            | 2.4                           | 1.0                | 1.4 (0.3 - 2.8)       |                  |
|                               | 18 – 23     | High         | No                   | 62712           | 2.4                           | 1.1                | 1.3 (1 - 1.5)         |                  |
|                               |             |              | Yes                  | 2165            | 2.8                           | 1.2                | 1.7 (0.4 - 3.3)       |                  |
|                               |             | Low          | No                   | 25939           | 4.2                           | 3.4                | 0.8 (0.3 - 1.2)       |                  |
|                               |             |              | Yes                  | 5720            | 2.5                           | 2.0                | 0.5 (-0.3 - 1.4)      |                  |
|                               | 24 – 30     | Middle       | No                   | 40241           | 3.3                           | 3.6                | -0.3 (-0.6 - 0.1)     |                  |
|                               |             |              | Yes                  | 4547            | 2.7                           | 1.8                | 0.9 (0 - 1.9)         |                  |
|                               |             | High         | No                   | 74281           | 2.7                           | 2.9                | -0.2 (-0.4 - 0.1)     |                  |
|                               |             |              | Yes                  | 2207            | 2.0                           | 2.7                | -0.6 (-1.9 - 0.5)     |                  |
|                               | Yes         | 12 – 17      | Low                  | No              | 83448                         | 3.6                | 3.7                   | 0 (-0.3 - 0.2)   |
|                               |             |              |                      | Yes             | 21013                         | 2.9                | 2.1                   | 0.8 (0.3 - 1.4)  |
|                               |             |              | Middle               | No              | 31818                         | 4.0                | 3.5                   | 0.5 (0.1 - 0.9)  |
|                               |             |              |                      | Yes             | 7826                          | 3.0                | 2.7                   | 0.3 (-0.5 - 1.2) |
| 18 – 23                       |             | High         | No                   | 25335           | 2.9                           | 3.0                | -0.1 (-0.5 - 0.3)     |                  |
|                               |             |              | Yes                  | 2152            | 2.5                           | 2.7                | -0.2 (-1.5 - 1.2)     |                  |
|                               |             | 24 – 30      | Low                  | No              | 3371                          | 30.1               | 22.3                  | 7.8 (4.7 - 10.9) |
|                               |             |              |                      | Yes             | 429                           | 20.4               | 13.4                  | 7 (-0.4 - 14.8)  |
| Middle                        | No          |              | 6787                 | 31.0            | 23.1                          | 7.9 (5.7 - 10.1)   |                       |                  |
|                               | Yes         |              | 565                  | 19.5            | 14.3                          | 5.2 (-1.5 - 12.7)  |                       |                  |
| Yes                           | 18 – 23     | High         | No                   | 7807            | 33.8                          | 27.7               | 6.1 (3.9 - 8.2)       |                  |
|                               |             |              | Yes                  | 369             | 29.7                          | 19.4               | 10.3 (1.2 - 19.6)     |                  |
|                               |             | Low          | No                   | 10205           | 38.8                          | 36.9               | 1.9 (0.1 - 3.8)       |                  |
|                               |             |              | Yes                  | 1068            | 28.1                          | 19.0               | 9.1 (3.5 - 14.6)      |                  |
|                               | 24 – 30     | Middle       | No                   | 12082           | 36.6                          | 35.0               | 1.6 (-0.1 - 3.3)      |                  |
|                               |             |              | Yes                  | 805             | 27.2                          | 19.1               | 8.1 (2 - 14.3)        |                  |
|                               |             | High         | No                   | 15994           | 37.2                          | 38.5               | -1.3 (-2.8 - 0.3)     |                  |
|                               |             |              | Yes                  | 598             | 26.3                          | 25.4               | 0.8 (-6.1 - 7.7)      |                  |
| Yes                           | Low         | No           | 26185                | 49.2            | 48.9                          | 0.3 (-0.9 - 1.6)   |                       |                  |
|                               |             | Yes          | 3759                 | 36.0            | 32.6                          | 3.4 (-0.3 - 7)     |                       |                  |
|                               | Middle      | No           | 7820                 | 49.2            | 50.4                          | -1.3 (-3.6 - 1)    |                       |                  |
|                               |             | Yes          | 1130                 | 31.4            | 37.2                          | -5.8 (-12.4 - 0.9) |                       |                  |

|      |     |      |      |      |                 |
|------|-----|------|------|------|-----------------|
| High | No  | 5868 | 47.8 | 47.8 | 0 (-2.6 - 2.6)  |
|      | Yes | 441  | 41.3 | 35.2 | 6.1 (-3.6 - 16) |
