# Supplementary material for: Population heterogeneity in associations between hormonal contraception and antidepressant use in Sweden: a prospective cohort study applying intersectional multilevel analysis of individual heterogeneity and discriminatory accuracy (MAIHDA)
Source: BMJ Open. 2021 Oct 1;11(10):e049553. doi: 10.1136/bmjopen-2021-049553 (PMC8488727; doi:10.1136/bmjopen-2021-049553)
Supplement: Supplementary data [file bmjopen-2021-049553supp007.pdf]

## Supplementary material 7

**Sensitivity analysis only including only new users and never-users of HC. Women with any dispensed prescription of HC during five years prior to baseline were excluded and only women with a HC prescription fill exclusively during follow-up are included as users. Non-users of HC are defined as not filing any prescription of HC during five years prior to baseline or during follow-up.**

**Table 1.** Characteristics of the 532 543 women aged 12 - 30 years by previous mental health issues and use of hormonal contraceptives. Values are percentages (number of women in parenthesis).

|                                 | Previous mental health issues |                      |                       |                       |
|---------------------------------|-------------------------------|----------------------|-----------------------|-----------------------|
|                                 | Yes<br>11.12 (59 238)         |                      | No<br>88.88 (473 305) |                       |
|                                 | Use of HC                     |                      | Use of HC             |                       |
|                                 | Yes<br>38.87 (23 034)         | No<br>61.13 (36 214) | Yes<br>1.83 (8 678)   | No<br>98.17 (464 627) |
| Antidepressant during follow-up | 60.11 (35 610)                | 39.89 (23 629)       |                       |                       |
| Age                             |                               |                      |                       |                       |
| 12-17 years                     | 32.53 (4 065)                 | 25.56 (11 946)       | 43.24 (38 426)        | 50.37 (193 658)       |
| 18-23 years                     | 37.18 (4 646)                 | 27.22 (12 722)       | 35.44 (31 489)        | 20.09 (77 244)        |
| 24-30 years                     | 30.28 (3 784)                 | 47.23 (22 075)       | 21.32 (18 948)        | 29.53 (113 540)       |
| Income level                    |                               |                      |                       |                       |
| Low inc.                        | 35.93 (4 489)                 | 43.77 (20 458)       | 24.00 (21 331)        | 30.34 (116 635)       |
| Medium inc.                     | 30.21 (3 775)                 | 28.13 (13 147)       | 29.43 (26 151)        | 30.46 (117 109)       |
| High inc.                       | 33.86 (4 231)                 | 28.11 (13 138)       | 46.57 (41 381)        | 39.20 (150 698)       |
| Immigrant background            |                               |                      |                       |                       |
| None                            | 92.84 (11 600)                | 88.12 (41 188)       | 91.78 (81 560)        | 81.40 (312 926)       |
| Yes                             | 7.16 (895)                    | 11.88 (5 555)        | 8.22 (7 303)          | 18.60 (71 516)        |

Table 2. Results from the Multilevel Analysis of Individual Heterogeneity and Discriminatory Accuracy (MAIHDA) distinguishing between measures of association (Odds Ratios) and measures of variance and discriminatory accuracy. The analyses are stratified by the existence of previous mental issues. Values are point estimations (with 95% credible intervals) or percentages where indicated.

|                                                          | Without metal health issues |                  | With mental health issues |                  |
|----------------------------------------------------------|-----------------------------|------------------|---------------------------|------------------|
|                                                          | Model 1                     | Model 2          | Model 1                   | Model 2          |
| <b>Measures of association</b>                           |                             |                  |                           |                  |
| <b>Age</b>                                               |                             |                  |                           |                  |
| 12-17 years                                              |                             | Reference        |                           | Reference        |
| 18-23 years                                              |                             | 1.76 (1.35-2.21) |                           | 1.64 (1.42-1.89) |
| 24-30 years                                              |                             | 2.34 (1.79-2.90) |                           | 2.69 (2.32-3.09) |
| <b>Income</b>                                            |                             |                  |                           |                  |
| High inc.                                                |                             | Reference        |                           | Reference        |
| Medium inc.                                              |                             | 1.06 (0.81-1.34) |                           | 0.84 (0.72-0.98) |
| Low inc.                                                 |                             | 1.08 (0.86-1.35) |                           | 0.87 (0.75-1.00) |
| <b>Immigrant background</b>                              |                             |                  |                           |                  |
| None                                                     |                             | Reference        |                           | Reference        |
| Yes                                                      |                             | 0.63 (0.51-0.76) |                           | 0.52 (0.46-0.59) |
| <b>Hormonal contraception</b>                            |                             |                  |                           |                  |
| No                                                       |                             | Reference        |                           | Reference        |
| Yes                                                      |                             | 1.86 (1.51-2.28) |                           | 1.18 (1.05-1.34) |
| <b>Measures of variance and discriminatory accuracy*</b> |                             |                  |                           |                  |
| Variance                                                 | 0.36 (0.22-0.60)            | 0.08 (0.04-0.15) | 0.31 (0.19-0.51)          | 0.02 (0.01-0.14) |
| VPC                                                      | 9.88%                       | 2.34%            | 8.67%                     | 0.63%            |
| PCV                                                      |                             | 76.32%           |                           | 92.73%           |
| AUC                                                      | 0.63 (0.63-0.63)            | 0.62 (0.62-0.62) | 0.65 (0.64-0.65)          | 0.64 (0.64-0.64) |

\*Between-strata variance, variance partition coefficient (VPC), proportional change of the variance (PCV), Area under the curve (AUC)

**Table 3.** Distribution of antidepressant use between different intersectional strata, and difference in usage between user and non-users of hormonal contraceptives but otherwise sharing the same intersectional stratum. The values are calculated from the multilevel analysis of individual heterogeneity and discriminatory accuracy (MAIHDA). Numbers are percentages.

| Previous mental health issues | Age (years) | Income level | Immigrant background | Number of women | Use of hormonal contraceptives (%) |      |                   |
|-------------------------------|-------------|--------------|----------------------|-----------------|------------------------------------|------|-------------------|
|                               |             |              |                      |                 | Yes                                | No   | Yes-No difference |
| No                            | 12 – 17     | Low          | No                   | 25342           | 3.7                                | 1.2  | 2.4 (1.9-3)       |
|                               |             |              | Yes                  | 7416            | 1.2                                | 0.4  | 0.7 (0.1-1.6)     |
|                               |             | Middle       | No                   | 69096           | 2.9                                | 1    | 1.9 (1.6-2.2)     |
|                               |             |              | Yes                  | 9839            | 2                                  | 0.6  | 1.4 (0.5-2.5)     |
|                               |             | High         | No                   | 115995          | 1.9                                | 0.9  | 1 (0.8-1.2)       |
|                               |             |              | Yes                  | 4396            | 2.5                                | 0.8  | 1.7 (0.6-3.2)     |
|                               | 18 – 23     | Low          | No                   | 15523           | 3.9                                | 2.7  | 1.2 (0.5-1.8)     |
|                               |             |              | Yes                  | 8238            | 2.2                                | 1.1  | 1 (0.2-2)         |
|                               |             | Middle       | No                   | 27757           | 2.9                                | 2.2  | 0.7 (0.3-1.1)     |
|                               |             |              | Yes                  | 6642            | 2.2                                | 1.1  | 1.1 (0.2-2.1)     |
|                               |             | High         | No                   | 47988           | 2.3                                | 2    | 0.3 (0-0.6)       |
|                               |             |              | Yes                  | 2585            | 2.5                                | 1.8  | 0.7 (-0.5-2.1)    |
|                               | 24 – 30     | Low          | No                   | 51819           | 4.2                                | 3.3  | 0.9 (0.4-1.3)     |
|                               |             |              | Yes                  | 29628           | 2.7                                | 1.3  | 1.4 (0.8-2.1)     |
|                               |             | Middle       | No                   | 22251           | 4.7                                | 2.8  | 1.9 (1.2-2.6)     |
|                               |             |              | Yes                  | 7675            | 2.8                                | 2.1  | 0.6 (-0.4-1.8)    |
|                               |             | High         | No                   | 18715           | 3.1                                | 2.6  | 0.6 (0-1.2)       |
|                               |             |              | Yes                  | 2400            | 2.9                                | 2.3  | 0.6 (-1-2.7)      |
| Yes                           | 12 – 17     | Low          | No                   | 2671            | 30.5                               | 21.8 | 8.6 (4.9-12.4)    |
|                               |             |              | Yes                  | 372             | 19.7                               | 12.6 | 7.1 (-1.3-16.6)   |
|                               |             | Middle       | No                   | 5554            | 31.6                               | 22.9 | 8.7 (6-11.5)      |
|                               |             |              | Yes                  | 507             | 17.3                               | 14.4 | 2.9 (-4.8-11.9)   |
|                               |             | High         | No                   | 6585            | 35.2                               | 27.9 | 7.3 (4.6-10)      |
|                               |             |              | Yes                  | 322             | 29.5                               | 19.6 | 9.9 (-0.5-21.1)   |
|                               | 18 – 23     | Low          | No                   | 4197            | 38.9                               | 39   | -0.1 (-3.5-3.4)   |
|                               |             |              | Yes                  | 666             | 29.2                               | 20.1 | 9.1 (0.7-17.9)    |
|                               |             | Middle       | No                   | 5049            | 38.2                               | 36.4 | 1.8 (-1.2-4.8)    |
|                               |             |              | Yes                  | 549             | 31.1                               | 18.6 | 12.5 (3.2-22.2)   |

|         |        |     |       |      |      |                 |
|---------|--------|-----|-------|------|------|-----------------|
| 24 – 30 | High   | No  | 6601  | 39.5 | 40.6 | -1.1 (-3.6-1.6) |
|         |        | Yes | 306   | 32.7 | 23.6 | 9.1 (-1.5-20.1) |
|         | Low    | No  | 14408 | 48.5 | 50.5 | -2 (-4.4-0.3)   |
|         |        | Yes | 2633  | 32.7 | 32.1 | 0.6 (-4.9-6.3)  |
|         | Middle | No  | 4486  | 49.5 | 50.8 | -1.3 (-5.3-2.7) |
|         |        | Yes | 777   | 34.4 | 36.5 | -2.1 (-11.7-8)  |
|         | High   | No  | 3237  | 46.3 | 49.3 | -3 (-7.6-1.7)   |
|         |        | Yes | 318   | 41.4 | 36.6 | 4.8 (-9-19.7)   |
